# Supplementary material for: Genome-Wide Identification and Analysis of the Ascorbate Peroxidase (APX) Gene Family of Winter Rapeseed (Brassica rapa L.) Under Abiotic Stress
Source: Front Genet. 2022 Jan 21;12:753624. doi: 10.3389/fgene.2021.753624 (PMC8814366; doi:10.3389/fgene.2021.753624)
Supplement: Supplementary file 1 [file Table2.XLSX]

## Sheet: Sheet2
Table S2 Basic physicochemical properties of BrPxds amino acids
Gene Name	Gene ID	Chr.	Genomic Location (bp)	Open Reading Frame	Exon	Intron	AA	MW (kDa)	pl	Phylogenetic cluster
Bra037176	Bra037176.1	A09	4138011:4139540	1530	4	3	337	37.474	9.05	VII
Bra000113	Bra000113.1	A03	9310856:9313219	2364	4	3	360	39.1	8.82	XIII
Bra022090	Bra022090.1	A02	19189955:19190950	996	1	0	331	36.537	7.09	II
Bra020370	Bra020370.1	A02	6442020:6443504	1485	3	2	316	34.811	9.97	VI
Bra038345	Bra038345.1	A02	11115722:11117219	1498	4	3	335	37.195	6.01	VII
Bra016127	Bra016127.1	A07	19295519:19297507	1989	3	2	362	39.762	8.58	IV
Bra003918	Bra003918.1	A07	15746959:15748850	1892	3	2	362	39.7799	9.17	IV
Bra031933	Bra031933.1	A02	27043829:27045482	1654	3	2	319	33.9254	8.82	XII
Bra011475	Bra011475.1	A01	2032183:2033673	1491	4	3	401	44.4452	5.05	X
Bra020071	Bra020071.1	A02	4918873:4920701	1829	4	3	329	35.3869	4.87	V
Bra037849	Bra037849.1	A09	3879753:3881217	1465	4	3	329	35.8444	9.6	II
Bra026207	Bra026207.1	A06	5576209:5577570	1362	4	3	317	34.3069	8.32	VI
Bra032477	Bra032477.1	A09	36235043:36236470	1428	4	3	321	35.1406	9.36	XIII
Bra013943	Bra013943.1	A01	8607946:8609344	1399	3	2	312	34.2074	10.54	IX
Bra011438	Bra011438.1	A01	2166149:2167750	1602	4	3	304	33.4688	5.83	III
Bra039872	Bra039872.1	A08	6133863:6135274	1412	2	1	342	38.1673	6.33	XI
Bra024267	Bra024267.1	A06	14628361:14631332	2972	3	2	334	36.1835	10.42	XII
Bra018677	Bra018677.1	A06	2668685:2670479	1795	9	8	305	33.9958	5.6	I
Bra030241	Bra030241.1	A04	9689421:9690565	1145	3	2	329	36.6949	6.12	XIII
Bra024972	Bra024972.1	A06	24481684:24482676	993	2	1	262	29.0284	8.46	II
Bra023449	Bra023449.1	A02	3418038:3420225	2188	4	3	368	39.6976	5.38	II
Bra022195	Bra022195.1	A05	19171085:19173147	2063	3	2	338	36.7486	4.7	X
Bra006423	Bra006423.1	A03	3456076:3457973	1898	3	2	310	33.6886	9.75	IX
Bra019132	Bra019132.1	A03	26161873:26163276	1404	3	2	312	34.3023	10.78	IX
Bra030607	Bra030607.1	A08	21115106:21116434	1329	4	3	332	36.6486	9.91	XIII
Bra023862	Bra023862.1	A01	20534877:20536581	1705	4	3	329	36.0384	9.56	XIII
Bra005850	Bra005850.1	A03	919037:920676	1640	4	3	324	34.9606	7.57	VI
Bra020072	Bra020072.1	A02	4921839:4923430	1592	4	3	324	34.8498	6.87	V
Bra024033	Bra024033.1	A03	28076237:28077822	1586	4	3	394	43.5402	5.48	X
Bra015668	Bra015668.1	A07	21447884:21450045	2162	10	9	440	47.6736	7.7	I
Bra015402	Bra015402.1	A10	2058729:2060068	1340	4	3	321	35.3639	9.47	XIII
Bra016930	Bra016930.1	A04	17546381:17547993	1613	4	3	326	35.4091	5.78	XII
Bra011683	Bra011683.1	A01	1066963:1072287	5325	10	9	723	80.9675	9	VII
Bra000228	Bra000228.1	A03	10029775:10031174	1400	4	3	327	35.6786	6.53	XII
Bra009221	Bra009221.1	A10	15709548:15711009	1462	4	3	358	37.4929	4.57	V
Bra011771	Bra011771.1	A01	637672:639003	1332	4	3	326	35.7247	9.15	II
Bra024635	Bra024635.1	A09	23896271:23897266	996	1	0	331	36.7807	5.69	II
Bra008291	Bra008291.1	A02	14502283:14503542	1260	4	3	319	34.5126	7.54	XII
Bra018007	Bra018007.1	A06	9475718:9480198	4481	4	3	353	38.664	5.41	V
Bra017830	Bra017830.1	A03	30743243:30744512	1270	3	2	251	27.3858	8.56	II
Bra030706	Bra030706.1	A08	20714562:20716095	1534	8	7	250	27.4952	5.72	I
Bra000058	Bra000058.1	A03	9103523:9105392	1870	4	3	350	37.898	5.25	V
Bra001986	Bra001986.1	A10	12465979:12467492	1514	4	3	317	34.6327	9.19	III
Bra028436	Bra028436.1	A02	305370:307397	2028	3	2	318	34.2298	8.53	XII
Bra000059	Bra000059.1	A03	9107404:9109415	2012	4	3	348	38.0261	5.68	V
Bra024102	Bra024102.1	A03	27617682:27619655	1974	4	3	325	36.026	9.62	II
Bra005456	Bra005456.1	A05	5582050:5584003	1954	3	2	318	35.409	9.65	IV
Bra017206	Bra017206.1	A04	16048013:16049785	1773	5	4	328	37.0547	7.09	X
Bra040175	Bra040175.1	A01	4487606:4488649	1044	1	0	347	38.5379	5.45	II
Bra015404	Bra015404.1	A10	2051392:2052817	1426	4	3	326	34.9939	8.72	XIII
Bra005458	Bra005458.1	A05	5592250:5594203	1954	3	2	318	35.409	9.65	IV
Bra039059	Bra039059.1	A09	1339316:1340296	981	1	0	326	36.0233	8.97	II
Bra014200	Bra014200.1	A08	2572359:2574967	2609	4	3	369	40.1383	5.65	V
Bra036842	Bra036842.1	A09	25450089:25451700	1612	4	3	337	37.4096	6.18	VII
Bra036445	Bra036445.1	A07	459111:460419	1309	3	2	317	34.2025	4.4	IX
Bra025604	Bra025604.1	A04	7538973:7539938	966	1	0	321	35.4134	8.59	II
Bra024268	Bra024268.1	A06	14635472:14637120	1649	3	2	333	36.4576	6.89	XII
Bra023639	Bra023639.1	A02	4329859:4331414	1556	3	2	310	33.8749	10.11	IX
Bra012061	Bra012061.1	A07	10245382:10246822	1441	4	3	310	34.3752	8.97	VII
Bra022567	Bra022567.1	A02	8871821:8872975	1155	3	2	322	35.76	9.37	III
Bra004014	Bra004014.1	A07	16315213:16316640	1428	4	3	334	37.1084	5.46	VII
Bra023099	Bra023099.1	A03	8683715:8685881	2167	5	4	330	37.1195	6.51	X
Bra037713	Bra037713.1	A04	18102898:18104698	1801	4	3	335	37.3438	9	X
Bra002269	Bra002269.1	A10	10576146:10578018	1873	4	3	330	35.7478	8.41	V
Bra011681	Bra011681.1	A01	1076913:1078143	1231	4	3	331	36.2109	8.7	VII
Bra024269	Bra024269.1	A06	14646774:14648054	1281	3	2	328	34.6953	8.78	XII
Bra013053	Bra013053.1	A03	20754777:20757060	2284	9	8	288	31.6989	5.52	I
Bra037007	Bra037007.1	A03	28991843:28993375	1533	4	3	304	33.3249	7.52	III
Bra034561	Bra034561.1	A08	12810021:12811537	1517	4	3	312	34.1339	8.51	III
Bra020191	Bra020191.1	A02	5475406:5477841	2436	4	3	333	36.5351	5.81	IX
Bra023149	Bra023149.1	A09	21227085:21228504	1420	2	1	347	38.4846	6.26	XI
Bra038526	Bra038526.1	A09	5104567:5105684	1118	3	2	314	34.9265	5.08	VIII
Bra031309	Bra031309.1	A05	16118925:16120287	1363	4	3	326	35.5189	9.22	XIII
Bra011170	Bra011170.1	A01	3530725:3532289	1565	4	3	324	36.1012	9.88	II
Bra009728	Bra009728.1	A06	16876641:16878367	1727	4	3	341	37.3566	8.49	X
Bra031934	Bra031934.1	A02	27034051:27035591	1541	3	2	333	35.6617	9.14	XII
Bra026470	Bra026470.1	A01	9117836:9120331	2496	4	3	326	36.2344	8.65	X
Bra017120	Bra017120.1	A04	16513268:16514892	1625	4	3	350	37.9232	6.89	V
Bra015695	Bra015695.1	A07	21318635:21319927	1293	4	3	337	36.7106	5.19	XII
Bra013938	Bra013938.1	A01	8552420:8554410	1991	4	3	326	35.2736	5.81	XII
Bra032476	Bra032476.1	A09	36231578:36232985	1408	4	3	320	35.2421	5.43	XIII
Bra002270	Bra002270.1	A10	10572529:10574278	1750	4	3	330	35.4958	4.88	V
Bra019131	Bra019131.1	A03	26165714:26166834	1121	3	2	312	33.6447	9.46	IX
Bra037877	Bra037877.1	A09	10748632:10752322	3691	4	3	352	38.8121	8.82	V
Bra001084	Bra001084.1	A03	14645784:14647975	2192	3	2	323	34.8398	5.75	IX
Bra017761	Bra017761.1	A03	30298508:30299789	1282	4	3	331	36.1832	9.2	VII
Bra017121	Bra017121.1	A04	16506897:16508740	1844	4	3	350	38.931	6.52	V
Bra036330	Bra036330.1	A02	22478344:22479883	1540	4	3	347	37.7811	6.23	VII
Bra031832	Bra031832.1	A02	27645699:27647058	1360	4	3	335	36.8131	9.59	II
Bra015403	Bra015403.1	A10	2055119:2056440	1322	4	3	320	35.6553	9.63	XIII
Bra028761	Bra028761.1	A02	2166934:2168775	1842	4	3	324	34.0515	9.08	VI
Bra035235	Bra035235.1	A08	9410614:9412060	1447	4	3	326	35.2873	8.1	XIII
Bra002271	Bra002271.1	A10	10568601:10570159	1559	4	3	280	30.0982	6.31	V
Bra023509	Bra023509.1	A02	3703839:3705388	1550	4	3	330	36.0735	8.63	XIII
Bra028285	Bra028285.1	A01	18942551:18943722	1172	3	2	322	35.9053	9.56	III
Bra006769	Bra006769.1	A03	4988097:4990546	2450	4	3	365	40.7353	9.48	VI
Bra029933	Bra029933.1	A01	15012594:15015129	2536	4	3	349	38.4859	8.08	V
Bra008775	Bra008775.1	A10	13802819:13804069	1251	3	2	264	27.9946	5.05	II
Bra032474	Bra032474.1	A09	36223870:36225285	1416	4	3	287	31.0471	8.86	XIII
Bra004343	Bra004343.1	A07	18120840:18122165	1326	4	3	335	37.1066	5.11	VII
Bra032475	Bra032475.1	A09	36228339:36229700	1362	4	3	319	35.515	9.08	XIII
Bra026822	Bra026822.1	A09	33879077:33880494	1418	4	3	288	31.2593	6.32	VI
Bra031598	Bra031598.1	A09	35650808:35652382	1575	6	5	253	27.9908	5.86	I
Bra030606	Bra030606.1	A08	21120182:21121767	1586	4	3	340	37.4832	9.52	XIII
Bra014895	Bra014895.1	A07	5466087:5467356	1270	2	1	351	38.8371	6.15	XI
Bra018006	Bra018006.1	A06	9453652:9456224	2573	4	3	354	39.0434	6.11	V
Bra033551	Bra033551.1	A01	11184435:11185797	1363	4	3	359	38.3756	4.43	VII
Bra039137	Bra039137.1	A05	23803495:23804707	1213	4	3	319	34.7052	9.06	XIII
Bra007831	Bra007831.1	A09	31145172:31146431	1260	4	3	333	35.9375	5.04	IX
Bra009220	Bra009220.1	A10	15706052:15707319	1268	4	3	338	35.2122	4.82	V
Bra008715	Bra008715.1	A10	13519069:13522162	3094	6	5	413	45.4079	9.2	XIII
Bra013576	Bra013576.1	A01	6423856:6425594	1739	4	3	331	37.5162	7.64	X
Bra009105	Bra009105.1	A10	15263739:15265119	1381	4	3	277	29.2797	8.2	VI
Bra005346	Bra005346.1	A05	4957095:4958299	1205	3	2	333	37.5621	5.26	VII
Bra021488	Bra021488.1	A01	25016095:25017308	1214	4	3	319	34.7353	9.19	XIII
Bra039920	Bra039920.1	A07	1630698:1631966	1269	4	3	336	36.4246	5.08	VII
Bra017686	Bra017686.1	A03	29765138:29766993	1856	9	8	287	31.7239	6.67	I
Bra033040	Bra033040.1	A02	21740522:21741481	960	1	0	319	35.1512	9.26	II
