# Supplementary material for: Genome-Wide Identification and Analysis of the Ascorbate Peroxidase (APX) Gene Family of Winter Rapeseed (Brassica rapa L.) Under Abiotic Stress
Source: Front Genet. 2022 Jan 21;12:753624. doi: 10.3389/fgene.2021.753624 (PMC8814366; doi:10.3389/fgene.2021.753624)
Supplement: Supplementary file 2 [file Table3.XLSX]

## Sheet: meme
Table S3 Motif prediction of Brpxd protein by MEME server
TRAINING SET
********************************************************************************
DATAFILE= ../PERR_pep_confirmed.fa
ALPHABET= ACDEFGHIKLMNPQRSTVWY
Sequence name Weight Length Sequence name Weight Length
------------- ------ ------ ------------- ------ ------
Bra037176.1 1.0000 337 Bra000113.1 1.0000 360
Bra022090.1 1.0000 331 Bra020370.1 1.0000 316
Bra038345.1 1.0000 335 Bra016127.1 1.0000 362
Bra003918.1 1.0000 362 Bra031933.1 1.0000 319
Bra011475.1 1.0000 401 Bra020071.1 1.0000 329
Bra037849.1 1.0000 329 Bra026207.1 1.0000 317
Bra032477.1 1.0000 321 Bra013943.1 1.0000 312
Bra011438.1 1.0000 304 Bra039872.1 1.0000 342
Bra024267.1 1.0000 334 Bra018677.1 1.0000 305
Bra030241.1 1.0000 329 Bra024972.1 1.0000 262
Bra023449.1 1.0000 368 Bra022195.1 1.0000 338
Bra006423.1 1.0000 310 Bra019132.1 1.0000 312
Bra030607.1 1.0000 332 Bra023862.1 1.0000 329
Bra005850.1 1.0000 324 Bra020072.1 1.0000 324
Bra024033.1 1.0000 394 Bra015668.1 1.0000 440
Bra015402.1 1.0000 321 Bra016930.1 1.0000 326
Bra011683.1 1.0000 723 Bra000228.1 1.0000 327
Bra009221.1 1.0000 358 Bra011771.1 1.0000 326
Bra024635.1 1.0000 331 Bra008291.1 1.0000 319
Bra018007.1 1.0000 353 Bra017830.1 1.0000 251
Bra030706.1 1.0000 250 Bra000058.1 1.0000 350
Bra001986.1 1.0000 317 Bra028436.1 1.0000 318
Bra000059.1 1.0000 348 Bra024102.1 1.0000 325
Bra005456.1 1.0000 318 Bra017206.1 1.0000 328
Bra040175.1 1.0000 347 Bra015404.1 1.0000 326
Bra005458.1 1.0000 318 Bra039059.1 1.0000 326
Bra014200.1 1.0000 369 Bra036842.1 1.0000 337
Bra036445.1 1.0000 317 Bra025604.1 1.0000 321
Bra024268.1 1.0000 333 Bra023639.1 1.0000 310
Bra012061.1 1.0000 310 Bra022567.1 1.0000 322
Bra004014.1 1.0000 334 Bra023099.1 1.0000 330
Bra037713.1 1.0000 335 Bra002269.1 1.0000 330
Bra011681.1 1.0000 331 Bra024269.1 1.0000 328
Bra013053.1 1.0000 288 Bra037007.1 1.0000 304
Bra034561.1 1.0000 312 Bra020191.1 1.0000 333
Bra023149.1 1.0000 347 Bra038526.1 1.0000 314
Bra031309.1 1.0000 326 Bra011170.1 1.0000 324
Bra009728.1 1.0000 341 Bra031934.1 1.0000 333
Bra026470.1 1.0000 326 Bra017120.1 1.0000 350
Bra015695.1 1.0000 337 Bra013938.1 1.0000 326
Bra032476.1 1.0000 320 Bra002270.1 1.0000 330
Bra019131.1 1.0000 312 Bra037877.1 1.0000 352
Bra001084.1 1.0000 323 Bra017761.1 1.0000 331
Bra017121.1 1.0000 350 Bra036330.1 1.0000 347
Bra031832.1 1.0000 335 Bra015403.1 1.0000 320
Bra028761.1 1.0000 324 Bra035235.1 1.0000 326
Bra002271.1 1.0000 280 Bra023509.1 1.0000 330
Bra028285.1 1.0000 322 Bra006769.1 1.0000 365
Bra029933.1 1.0000 349 Bra008775.1 1.0000 264
Bra032474.1 1.0000 287 Bra004343.1 1.0000 335
Bra032475.1 1.0000 319 Bra026822.1 1.0000 288
Bra031598.1 1.0000 253 Bra030606.1 1.0000 340
Bra014895.1 1.0000 351 Bra018006.1 1.0000 354
Bra033551.1 1.0000 359 Bra039137.1 1.0000 319
Bra007831.1 1.0000 333 Bra009220.1 1.0000 338
Bra008715.1 1.0000 413 Bra013576.1 1.0000 331
Bra009105.1 1.0000 277 Bra005346.1 1.0000 333
Bra021488.1 1.0000 319 Bra039920.1 1.0000 336
Bra017686.1 1.0000 287 Bra033040.1 1.0000 319
********************************************************************************
********************************************************************************
COMMAND LINE SUMMARY
********************************************************************************
This information can also be useful in the event you wish to report a
problem with the MEME software.
command: meme ../PERR_pep_confirmed.fa -protein -oc ./ -nostatus -time 18000 -maxsize 6000000 -mod anr -nmotifs 10 -minw 6 -maxw 100
model: mod= anr nmotifs= 10 evt= inf
object function= E-value of product of p-values
width: minw= 6 maxw= 100
width: wg= 11 ws= 1 endgaps= yes
nsites: minsites= 2 maxsites= 50 wnsites= 0.8
theta: spmap= pam spfuzz= 120
global: substring= yes branching= no wbranch= no
em: prior= megap b= 195615 maxiter= 50
distance= 1e-05
data: n= 39123 N= 118 shuffle= -1
sample: seed= 0 ctfrac= -1 maxwords= -1
Dirichlet mixture priors file: prior30.plib
Letter frequencies in dataset:
A 0.081 C 0.026 D 0.064 E 0.039 F 0.053 G 0.071 H 0.017 I 0.048 K 0.048
L 0.097 M 0.021 N 0.055 P 0.045 Q 0.031 R 0.062 S 0.088 T 0.056 V 0.072
W 0.004 Y 0.022
Background letter frequencies (from dataset with add-one prior applied):
A 0.081 C 0.026 D 0.064 E 0.039 F 0.053 G 0.071 H 0.017 I 0.048 K 0.048
L 0.097 M 0.022 N 0.055 P 0.045 Q 0.031 R 0.062 S 0.088 T 0.056 V 0.072
W 0.004 Y 0.022
********************************************************************************
********************************************************************************
MOTIF GFEVIDRIKAALEKACPGVVSCADILALAARDSVVLAGGPSW MEME-1	width = 42 sites = 50 llr = 4024 E-value = 4.5e-1181
********************************************************************************
--------------------------------------------------------------------------------
	Motif GFEVIDRIKAALEKACPGVVSCADILALAARDSVVLAGGPSW MEME-1 Description
--------------------------------------------------------------------------------
Simplified A 1:::::12:44::22:::::::9:::7:78::4::12:::::
pos.-specific C :::::::::::::::a:::::a::::::::::::::::::::
probability D ::2::71::1:::::::::::::a:::::::7::::::::::
matrix E ::4::21:::2:a:2:::::::::::::::::::1:::::::
F :8:1::::::::::::::::::::::::::::::1:::::::
G 8:1::::::::::::::6::::::::::::::1::::7a:::
H ::::::::::::::::::::::::::::::::::::::::::
I :::17::5::11::::::1:::::72:3:::1:11:1::::1
K ::1:::1:a:1::31::1:::::::::::::::::::1::1:
L :::1::::::16::1:::::::::17:6::::::252:::::
M :::::::1:::::::::::::::::::::::::::1::::::
N 1:1::12::::::::::::::::::::::::::::::1::::
P ::::::::::::::::a::::::::::::::::::::::a::
Q ::::::1:::1::11::1::::::::::::1::::1::::::
R ::::::2:::1::2:::1::::::::::::9:::::::::1:
S :::::::::3:::1:::1::a:1:::::11::51::2:::3:
T ::::::1::2::::::::3:::::::3::1:::11:1:::::
V ::163::1::13::2:::5a::::21::1::::7411:::::
W ::::::::::::::::::::::::::::::::::::::::27
Y :2:1::::::::::::::::::::::::::::::::::::23
bits 7.8
7
6.3
5.5 * * *
Relative 4.7 * * * *
Entropy 3.9 * * * ** * * * ** *
(116.1 bits) 3.1 ** ** * * ** ****** ** ** *
2.3 ** *** ** ** ***************** * *** *
1.6 ****** ****** ******************** * *****
0.8 ******************************************
0.0 ------------------------------------------
Multilevel GFEVIDRIKAALEKACPGVVSCADILALAARDSVVLAGGPSW
consensus D V A S V E T VITI A S Y
sequence
--------------------------------------------------------------------------------
--------------------------------------------------------------------------------
	Motif GFEVIDRIKAALEKACPGVVSCADILALAARDSVVLAGGPSW MEME-1 sites sorted by position p-value
--------------------------------------------------------------------------------
Sequence name Start P-value Site
------------- ----- --------- ------------------------------------------
Bra011683.1 496 4.45e-43 SSNPNSKSAR GFEVVDQIKAQLEKQCPGTVSCADILTLAARDSSVLTGGPSW MVPLGRRDSR
Bra020072.1 94 5.99e-42 LAIPNLNSAR GFEVIDTIKADVEYACPGVVSCADILTLAARDSVVLSGGPQW RVALGRTDGL
Bra028761.1 104 7.15e-42 NAGPNRNSAR GFTVIDTIKSAVEKACPGVVSCADILAIAARDSVVQLGGPNW NVKVGRRDAK
Bra005850.1 104 2.42e-41 NAASNHNSAR GFNVIDNIKSAVERVCPGVVSCADILAIAARDSVVTLGGPRW RLNLGRRDAR
Bra012061.1 107 9.28e-41 RSNPNRNSAR GFEVIEEIKHALEQECPETVSCADILALAARDSTVITGGPSW EVPLGRRDAR
Bra020370.1 95 3.96e-40 TAGPNNNSVR GFEVIDKIKSRVEKLCPGVVSCADIVAISARDSVLLLGGPRW SVKLGRRDSK
Bra039920.1 109 4.63e-40 GSNPNSNSAR GFDVVDQIKAALENECPGTVSCADLLTLAARDSSVLTGGPSW MVPLGRRDSR
Bra032476.1 97 8.64e-40 RDAIPNLSLR GYEVVDTVKSVLESECPGVVSCADILALVARDAVLAIKGPWW PVPLGRRDGR
Bra017120.1 105 1.37e-39 DAAPNANSAR GFDVVDRMKAEIEEVCPGTVSCADVLAIAAQISVLLSGGPWW PVSLGRRDGS
Bra032477.1 98 2.16e-39 RDAIPNLSVR GYEVVDAAKAALEKKCPGVVSCADVLALVARDAVLVINGPWW PVPLGRRDGR
Bra036330.1 120 4.55e-39 NAGPNKNSIK GFEVIDEIKAKLEQVCPQIVSCADILALAARGSTILSGGPSW ELPLGRRDST
Bra031309.1 98 1.09e-38 KDAPPNLTLR GFGFVERIKTILEAECPKTVSCADIIALTARDAVVATGGPWW SVPTGRRDGR
Bra023862.1 101 1.93e-38 RDAPPNLTLR GFGFVERIKTLLEAECPKTVSCADIIALTARDSVVATGGPWW SVPTGRRDGR
Bra031933.1 96 3.91e-38 QTARSNVNLR GFDVIENAKTQLEAACPGVVSCADILALAARDSVVLTRGISW QVPTGRRDGR
Bra037877.1 105 4.49e-38 DAFGNANSAR GFDVIDRMKAAVEKTCPKTVSCADLLAIAAQKSVVLAGGPSW TVASGRRDSL
Bra026207.1 96 6.81e-38 DAVPNFQSAR GFEVIDQAKSAVERVCPGVVSCADIIAVAARDASEYVGGPKY AVKVGRRDST
Bra016930.1 97 7.81e-38 QAALASSGLR GFEVIDDAKARLESVCPEVVSCADILALAARDAVDLSSGPSW TVPTGRKDGR
Bra032475.1 96 1.35e-37 RRRSPNLTLK GYEVVDAVKSALEIACPGVVSCADVLALVARDAVLVIRGPWW PVPLGRRDGR
Bra017121.1 105 1.76e-37 DAAPNANSAR GFDVIDRMKDEIELACPRTVSCADILTIASQISVLLSGGPWW PVPLGRRDSL
Bra026822.1 95 2.02e-37 DSVANFQSAR GFEVIDEAKSAVESVCPGVVSCADIIAVAARDASEYVGGPRY AVKVGRRDST
Bra029933.1 102 2.02e-37 DAAGNANSAR GFPVIDRMKAAVERACPRTVSCADMLTIAAQQSVTLAGGPSW RVPLGRRDSL
Bra028285.1 99 2.02e-37 KDGPPNISVR SFYVIDNAKTKLEKVCPRTVSCADVIAIAARDVVTLSGGPYW SVLKGRKDGR
Bra004343.1 103 2.30e-37 KASPNINSLK GYEIVDRIKNIIESECPGVVSCADLLTISARDATILVGGPYW DVPVGRKDSK
Bra008291.1 96 2.30e-37 RFAAGNAGVG GFDVIDAAKSELERLCPGVVSCADIVALAARDAVVAAKGPLY NVLTGRRDGQ
Bra011475.1 145 2.63e-37 KEASPNQSLK GFDVIEWIKSELEKVCPGVVSCADVLVLAAREAVLMAGGPFY PLETGRRDSV
Bra000058.1 105 3.92e-37 DAAPNANSAR GFNVIDRMKAKLETACPKTVSCADVLTIASQISVLLSGGPWW PLPLGRRDSL
Bra014895.1 123 4.47e-37 RRSPASKTLR GFELIDDIKSEIEKACPGLVSCADILTAASRDATFQLGGPYW PNAYGRRDST
Bra015403.1 98 6.61e-37 RYAAPNLSVR GYEVVDAVKSALERKCPGVVSCADVLSLVARDAVIVINGPWW PVPLGRRDGR
Bra018007.1 107 9.75e-37 DAGGETKSAR GFPVIDTMKAAVESACPSTVSCADMLTIAAQQSVTLAGGPSW RVPLGRRDSL
Bra015695.1 114 1.43e-36 RFAPGNAGVG GFDVIDNAKSELERLCPGVVSCADIVALAARNAVVAAKGPFY EVPTGRRDGL
Bra006769.1 102 1.63e-36 TAGPNNNSVR GFDVVDKIKSRVERLCPGVVSCADILAIIARDSVLLLDGPGW SVKLGRRDST
Bra004014.1 102 2.10e-36 KASPNINSLK GYKIVDRIKNIIESECPGVVSCADLLTISARDATILVGGPYW DVPVGRKDSK
Bra015404.1 98 3.47e-36 KDAAPNLTVR GFGFIEAIKAVLEAQCPGIVSCADIIALASRDAIVFTGGPNW SVPTGRRDGR
Bra013938.1 97 8.28e-36 KFAFGHEGVR GFEIIEAVKAEVEAACPGVVSCADIVALAARDAISLANGPAY EVPTGRRDGR
Bra035235.1 99 1.35e-35 KVAPPNLTVR GFDFIDLVKTVLERKCPGVVSCADIITLATRDSVAAIGGPTW NVPTGRRDGR
Bra022567.1 99 1.35e-35 KDGPPNISVR SFYVIEDAKRKLEKVCPRTVSCADVIAIAARDVVTLSGGPYW NVLKGRKDGT
Bra023509.1 105 1.94e-35 KNAPPNLSLR GFEVIDNVKAAVEEECPGVVSCSDVLALVARDAVVELDGLSW GVETGRRDGR
Bra037007.1 89 4.47e-35 KDSPANLSLR GYEIIDDAKKKIEATCPGVVSCADIIAMAARDAVFSANGPYY QIPKGRFDGK
Bra006423.1 91 1.14e-34 KTAGPNGSVR EFALIDQIKAQLEAACPSTVSCADIITLATRDSVALAGGPSY SIPTGRRDGL
Bra009220.1 109 3.60e-34 NAGPNANSAR GFNVVDNIKTALENACPGVVSCSDVLALASEASVSLSGGPSW TVLLGRRDSL
Bra001084.1 97 1.10e-33 KNAGPNGSVR GYELIDEIKTALEAQCPSKVSCSDIVTLATRDSVFFGGGPSY VVPTGRRDGF
Bra039872.1 114 1.10e-33 RRSPASKTLR GFELIDDIKSEMEKSCPKLVSCADILAAATRSATYQLGGPYW PNAYGRRDSK
Bra037713.1 107 5.67e-33 RNAPQNRGLG AFVIIDKIKKVLEQRCPGIVSCADILNLAARDAVHLAGAPSY PVFTGRRDGL
Bra017206.1 104 7.82e-33 QKSTRSFGMR NFKYIKTIKDALEKECPGTVSCADIVALSARDGIVMLKGPKI DMIKTGRRDS
Bra005458.1 91 3.08e-32 AEENKELREE GFESIIKAKALVESHCPSRVSCSDILAIAARDFIHLAGGPYY QVKKGRWDGK
Bra023099.1 104 6.43e-31 QKSTRSFGMR NFKYVKVIKDALEKECPSTVSCADIVALSARDGIVMLKGPKI DMIKTGRRDS
Bra013576.1 105 1.05e-30 KEHDRSFGLR NFRYIEEIKEALERECPGVVSCSDILVLSAREGIEAVGGPHI PLKTGRRDGR
Bra003918.1 122 1.41e-30 SIPNLTLRQA AFVVINNLRALVHKQCGQVVSCSDILALAARDSVVLSGGPDY DVPLGRRDSL
Bra016127.1 122 1.41e-30 SIPNLTLRQA AFVVINNLRALVHKQCGQVVSCSDILALAARDSVVLSGGPDY AVPLGRRDSL
Bra022090.1 105 1.71e-30 DDLNDSLPGD AFDIVNRIKTALELSCPGVVSCADILAQATRGLVTMVGGPYF DVKLGRKDGL
--------------------------------------------------------------------------------
--------------------------------------------------------------------------------
	Motif GFEVIDRIKAALEKACPGVVSCADILALAARDSVVLAGGPSW MEME-1 block diagrams
--------------------------------------------------------------------------------
SEQUENCE NAME POSITION P-VALUE MOTIF DIAGRAM
------------- ---------------- -------------
Bra011683.1 4.4e-43 495_[1]_186
Bra020072.1 6e-42 93_[1]_189
Bra028761.1 7.2e-42 103_[1]_179
Bra005850.1 2.4e-41 103_[1]_179
Bra012061.1 9.3e-41 106_[1]_162
Bra020370.1 4e-40 94_[1]_180
Bra039920.1 4.6e-40 108_[1]_186
Bra032476.1 8.6e-40 96_[1]_182
Bra017120.1 1.4e-39 104_[1]_204
Bra032477.1 2.2e-39 97_[1]_182
Bra036330.1 4.5e-39 119_[1]_186
Bra031309.1 1.1e-38 97_[1]_187
Bra023862.1 1.9e-38 100_[1]_187
Bra031933.1 3.9e-38 95_[1]_182
Bra037877.1 4.5e-38 104_[1]_206
Bra026207.1 6.8e-38 95_[1]_180
Bra016930.1 7.8e-38 96_[1]_188
Bra032475.1 1.3e-37 95_[1]_182
Bra017121.1 1.8e-37 104_[1]_204
Bra026822.1 2e-37 94_[1]_152
Bra029933.1 2e-37 101_[1]_206
Bra028285.1 2e-37 98_[1]_182
Bra004343.1 2.3e-37 102_[1]_191
Bra008291.1 2.3e-37 95_[1]_182
Bra011475.1 2.6e-37 144_[1]_215
Bra000058.1 3.9e-37 104_[1]_204
Bra014895.1 4.5e-37 122_[1]_187
Bra015403.1 6.6e-37 97_[1]_181
Bra018007.1 9.8e-37 106_[1]_205
Bra015695.1 1.4e-36 113_[1]_182
Bra006769.1 1.6e-36 101_[1]_222
Bra004014.1 2.1e-36 101_[1]_191
Bra015404.1 3.5e-36 97_[1]_187
Bra013938.1 8.3e-36 96_[1]_188
Bra035235.1 1.3e-35 98_[1]_186
Bra022567.1 1.3e-35 98_[1]_182
Bra023509.1 1.9e-35 104_[1]_184
Bra037007.1 4.5e-35 88_[1]_174
Bra006423.1 1.1e-34 90_[1]_178
Bra009220.1 3.6e-34 108_[1]_188
Bra001084.1 1.1e-33 96_[1]_185
Bra039872.1 1.1e-33 113_[1]_187
Bra037713.1 5.7e-33 106_[1]_187
Bra017206.1 7.8e-33 103_[1]_183
Bra005458.1 3.1e-32 90_[1]_186
Bra023099.1 6.4e-31 103_[1]_185
Bra013576.1 1.1e-30 104_[1]_185
Bra003918.1 1.4e-30 121_[1]_199
Bra016127.1 1.4e-30 121_[1]_199
Bra022090.1 1.7e-30 104_[1]_185
--------------------------------------------------------------------------------
--------------------------------------------------------------------------------
	Motif GFEVIDRIKAALEKACPGVVSCADILALAARDSVVLAGGPSW MEME-1 in BLOCKS format
--------------------------------------------------------------------------------
BL MOTIF GFEVIDRIKAALEKACPGVVSCADILALAARDSVVLAGGPSW width=42 seqs=50
Bra011683.1 ( 496) GFEVVDQIKAQLEKQCPGTVSCADILTLAARDSSVLTGGPSW 1
Bra020072.1 ( 94) GFEVIDTIKADVEYACPGVVSCADILTLAARDSVVLSGGPQW 1
Bra028761.1 ( 104) GFTVIDTIKSAVEKACPGVVSCADILAIAARDSVVQLGGPNW 1
Bra005850.1 ( 104) GFNVIDNIKSAVERVCPGVVSCADILAIAARDSVVTLGGPRW 1
Bra012061.1 ( 107) GFEVIEEIKHALEQECPETVSCADILALAARDSTVITGGPSW 1
Bra020370.1 ( 95) GFEVIDKIKSRVEKLCPGVVSCADIVAISARDSVLLLGGPRW 1
Bra039920.1 ( 109) GFDVVDQIKAALENECPGTVSCADLLTLAARDSSVLTGGPSW 1
Bra032476.1 ( 97) GYEVVDTVKSVLESECPGVVSCADILALVARDAVLAIKGPWW 1
Bra017120.1 ( 105) GFDVVDRMKAEIEEVCPGTVSCADVLAIAAQISVLLSGGPWW 1
Bra032477.1 ( 98) GYEVVDAAKAALEKKCPGVVSCADVLALVARDAVLVINGPWW 1
Bra036330.1 ( 120) GFEVIDEIKAKLEQVCPQIVSCADILALAARGSTILSGGPSW 1
Bra031309.1 ( 98) GFGFVERIKTILEAECPKTVSCADIIALTARDAVVATGGPWW 1
Bra023862.1 ( 101) GFGFVERIKTLLEAECPKTVSCADIIALTARDSVVATGGPWW 1
Bra031933.1 ( 96) GFDVIENAKTQLEAACPGVVSCADILALAARDSVVLTRGISW 1
Bra037877.1 ( 105) GFDVIDRMKAAVEKTCPKTVSCADLLAIAAQKSVVLAGGPSW 1
Bra026207.1 ( 96) GFEVIDQAKSAVERVCPGVVSCADIIAVAARDASEYVGGPKY 1
Bra016930.1 ( 97) GFEVIDDAKARLESVCPEVVSCADILALAARDAVDLSSGPSW 1
Bra032475.1 ( 96) GYEVVDAVKSALEIACPGVVSCADVLALVARDAVLVIRGPWW 1
Bra017121.1 ( 105) GFDVIDRMKDEIELACPRTVSCADILTIASQISVLLSGGPWW 1
Bra026822.1 ( 95) GFEVIDEAKSAVESVCPGVVSCADIIAVAARDASEYVGGPRY 1
Bra029933.1 ( 102) GFPVIDRMKAAVERACPRTVSCADMLTIAAQQSVTLAGGPSW 1
Bra028285.1 ( 99) SFYVIDNAKTKLEKVCPRTVSCADVIAIAARDVVTLSGGPYW 1
Bra004343.1 ( 103) GYEIVDRIKNIIESECPGVVSCADLLTISARDATILVGGPYW 1
Bra008291.1 ( 96) GFDVIDAAKSELERLCPGVVSCADIVALAARDAVVAAKGPLY 1
Bra011475.1 ( 145) GFDVIEWIKSELEKVCPGVVSCADVLVLAAREAVLMAGGPFY 1
Bra000058.1 ( 105) GFNVIDRMKAKLETACPKTVSCADVLTIASQISVLLSGGPWW 1
Bra014895.1 ( 123) GFELIDDIKSEIEKACPGLVSCADILTAASRDATFQLGGPYW 1
Bra015403.1 ( 98) GYEVVDAVKSALERKCPGVVSCADVLSLVARDAVIVINGPWW 1
Bra018007.1 ( 107) GFPVIDTMKAAVESACPSTVSCADMLTIAAQQSVTLAGGPSW 1
Bra015695.1 ( 114) GFDVIDNAKSELERLCPGVVSCADIVALAARNAVVAAKGPFY 1
Bra006769.1 ( 102) GFDVVDKIKSRVERLCPGVVSCADILAIIARDSVLLLDGPGW 1
Bra004014.1 ( 102) GYKIVDRIKNIIESECPGVVSCADLLTISARDATILVGGPYW 1
Bra015404.1 ( 98) GFGFIEAIKAVLEAQCPGIVSCADIIALASRDAIVFTGGPNW 1
Bra013938.1 ( 97) GFEIIEAVKAEVEAACPGVVSCADIVALAARDAISLANGPAY 1
Bra035235.1 ( 99) GFDFIDLVKTVLERKCPGVVSCADIITLATRDSVAAIGGPTW 1
Bra022567.1 ( 99) SFYVIEDAKRKLEKVCPRTVSCADVIAIAARDVVTLSGGPYW 1
Bra023509.1 ( 105) GFEVIDNVKAAVEEECPGVVSCSDVLALVARDAVVELDGLSW 1
Bra037007.1 ( 89) GYEIIDDAKKKIEATCPGVVSCADIIAMAARDAVFSANGPYY 1
Bra006423.1 ( 91) EFALIDQIKAQLEAACPSTVSCADIITLATRDSVALAGGPSY 1
Bra009220.1 ( 109) GFNVVDNIKTALENACPGVVSCSDVLALASEASVSLSGGPSW 1
Bra001084.1 ( 97) GYELIDEIKTALEAQCPSKVSCSDIVTLATRDSVFFGGGPSY 1
Bra039872.1 ( 114) GFELIDDIKSEMEKSCPKLVSCADILAAATRSATYQLGGPYW 1
Bra037713.1 ( 107) AFVIIDKIKKVLEQRCPGIVSCADILNLAARDAVHLAGAPSY 1
Bra017206.1 ( 104) NFKYIKTIKDALEKECPGTVSCADIVALSARDGIVMLKGPKI 1
Bra005458.1 ( 91) GFESIIKAKALVESHCPSRVSCSDILAIAARDFIHLAGGPYY 1
Bra023099.1 ( 104) NFKYVKVIKDALEKECPSTVSCADIVALSARDGIVMLKGPKI 1
Bra013576.1 ( 105) NFRYIEEIKEALERECPGVVSCSDILVLSAREGIEAVGGPHI 1
Bra003918.1 ( 122) AFVVINNLRALVHKQCGQVVSCSDILALAARDSVVLSGGPDY 1
Bra016127.1 ( 122) AFVVINNLRALVHKQCGQVVSCSDILALAARDSVVLSGGPDY 1
Bra022090.1 ( 105) AFDIVNRIKTALELSCPGVVSCADILAQATRGLVTMVGGPYF 1
//
--------------------------------------------------------------------------------
--------------------------------------------------------------------------------
	Motif GFEVIDRIKAALEKACPGVVSCADILALAARDSVVLAGGPSW MEME-1 position-specific scoring matrix
--------------------------------------------------------------------------------
log-odds matrix: alength= 20 w= 42 n= 34285 bayes= 11.029 E= 4.5e-1181
-48 -478 -385 -133 -577 355 -364 -518 -385 -592 -453 -40 -475 -415 -432 -151 -444 -507 -302 -436
-743 -655 -799 -713 396 -762 -346 -600 -700 -572 -547 -654 -732 -589 -692 -714 -688 -648 -154 291
-148 -481 162 322 -467 -31 -193 -392 48 -409 -300 14 -23 -150 -121 -286 -108 -35 -275 75
-393 -420 -657 -501 54 -568 -423 134 -515 -19 -250 -557 -552 -466 -551 -208 -374 309 -281 137
-555 -535 -856 -737 -600 -816 -813 382 -773 -431 -417 -798 -782 -778 -870 -788 -529 207 -642 -641
-402 -505 355 165 -541 -440 -282 -191 -95 -524 -437 -22 -495 -316 -471 -417 -427 -477 -321 -395
51 -475 55 138 -461 -373 -188 -387 81 -207 -295 142 -359 138 155 -282 77 -169 201 -299
139 -527 -835 -700 -536 -772 -698 334 -726 -110 244 -759 -741 -693 -792 -733 -514 84 -519 -573
-402 -438 -531 -393 -598 -500 -346 -406 425 -513 -399 -406 -462 -365 -58 -495 -405 -506 -277 -439
201 -502 -7 -37 -494 -381 35 -423 -1 -440 -332 -30 -387 -178 -128 154 141 -418 -303 -329
207 -480 -135 199 -466 -386 -202 20 107 -36 -300 -279 -372 102 -1 -297 -269 5 -278 -310
-608 -584 -909 -765 -451 -840 -709 136 -792 251 4 -834 -769 -679 -818 -823 -581 204 -441 -554
-546 -637 -283 463 -673 -563 -48 -547 -561 -662 -570 -486 -646 -366 -613 -607 -564 -605 -440 -556
88 -476 -294 35 -462 -374 -189 -124 241 -126 -296 -35 -360 103 141 59 -107 -383 -270 -15
143 -475 -294 240 -461 -374 36 -385 48 -37 -295 -265 -360 166 -119 -92 -35 115 -270 -300
-476 526 -632 -509 -595 -615 -494 -482 -590 -571 -460 -599 -599 -543 -586 -579 -472 -567 -454 -554
-647 -757 -769 -693 -830 -83 -658 -796 -712 -793 -768 -784 442 -673 -761 -709 -699 -788 -610 -745
-483 -621 -514 5 -701 307 -324 -561 115 -565 -471 -418 -563 97 45 10 -460 -567 -402 -481
-394 -415 -658 -495 -414 -561 -429 50 -125 -104 -260 -548 -553 -454 -162 -498 243 284 -300 -369
-797 -769 -885 -872 -838 -790 -767 -531 -890 -735 -727 -905 -803 -847 -896 -898 -784 379 -651 -782
-769 -804 -880 -881 -923 -758 -757 -971 -899 -935 -934 -896 -791 -840 -890 350 -823 -935 -651 -812
-476 526 -632 -509 -595 -615 -494 -482 -590 -571 -460 -599 -599 -543 -586 -579 -472 -567 -454 -554
338 -459 -754 -661 -734 -458 -627 -672 -717 -713 -599 -643 -576 -603 -710 67 -443 -550 -541 -669
-884 -840 395 -689 -910 -777 -718 -939 -864 -920 -917 -751 -797 -813 -870 -892 -866 -951 -638 -789
-384 -412 -498 -403 -355 -521 -419 381 -402 -28 45 -453 -500 -401 -487 -449 -328 126 -261 -312
-587 -564 -887 -753 -488 -832 -737 206 -784 273 -319 -820 -772 -705 -832 -810 -560 101 -486 -579
300 -440 -727 -634 -711 -442 -607 -641 -689 -686 -572 -145 -564 -584 -689 -182 218 -83 -522 -649
-110 -490 -711 -542 -367 -647 -483 250 -558 260 12 -626 -581 -71 -576 -589 -457 -72 -310 -411
315 -224 -480 -347 -431 -269 -369 -147 -389 -383 -280 -444 -493 -372 -436 15 -75 12 -253 -384
327 -441 -738 -640 -715 -443 -612 -648 -695 -691 -576 -627 -564 -587 -693 21 83 -527 -525 -653
-485 -495 -573 -114 -645 -535 -276 -513 -163 -528 -457 -447 -496 164 377 -507 -464 -572 -294 -462
-265 -456 366 -4 -494 -195 -249 -100 -223 -487 -401 -106 -484 -82 -447 -277 -408 -441 -272 -353
229 -445 -741 -640 -142 -21 -602 -589 -690 -224 -545 -626 -563 -582 -689 235 -427 -82 -509 -623
-488 -506 -792 -669 -582 -717 -686 139 -708 -428 -406 -737 -706 -694 -767 -21 105 321 -573 -608
-86 -352 -175 53 16 -477 115 82 -421 87 -189 -466 -471 -373 -461 -111 80 224 -210 -7
62 -363 -582 -104 -44 -492 -348 -66 -426 236 178 -478 -467 78 -458 -205 -127 -14 -212 72
136 -360 -595 -432 -352 -177 -357 109 -440 87 -203 -481 -481 -390 -478 121 126 78 -224 -297
-345 -506 -96 -354 -601 342 -351 -547 59 -616 -483 17 -489 -405 -102 -213 -443 -537 -333 -449
-191 -505 -430 -404 -615 374 -406 -557 -428 -628 -492 -394 -510 -455 -474 -410 -474 -540 -341 -476
-325 -508 -480 -365 -535 -480 -377 -141 -385 -227 -421 -488 436 -352 -460 -394 -384 -448 -399 -486
-146 -474 -59 -136 -53 -165 37 -386 48 -207 -295 -35 -359 -12 -1 152 -107 -381 513 284
-746 -657 -801 -714 -94 -764 -338 28 -698 -571 -545 -649 -735 -584 -688 -714 -685 -646 718 357
--------------------------------------------------------------------------------
--------------------------------------------------------------------------------
	Motif GFEVIDRIKAALEKACPGVVSCADILALAARDSVVLAGGPSW MEME-1 position-specific probability matrix
--------------------------------------------------------------------------------
letter-probability matrix: alength= 20 w= 42 nsites= 50 E= 4.5e-1181
0.080000 0.000000 0.000000 0.020000 0.000000 0.800000 0.000000 0.000000 0.000000 0.000000 0.000000 0.060000 0.000000 0.000000 0.000000 0.040000 0.000000 0.000000 0.000000 0.000000
0.000000 0.000000 0.000000 0.000000 0.840000 0.000000 0.000000 0.000000 0.000000 0.000000 0.000000 0.000000 0.000000 0.000000 0.000000 0.000000 0.000000 0.000000 0.000000 0.160000
0.020000 0.000000 0.220000 0.400000 0.000000 0.060000 0.000000 0.000000 0.060000 0.000000 0.000000 0.060000 0.040000 0.000000 0.020000 0.000000 0.020000 0.060000 0.000000 0.040000
0.000000 0.000000 0.000000 0.000000 0.080000 0.000000 0.000000 0.120000 0.000000 0.080000 0.000000 0.000000 0.000000 0.000000 0.000000 0.020000 0.000000 0.640000 0.000000 0.060000
0.000000 0.000000 0.000000 0.000000 0.000000 0.000000 0.000000 0.700000 0.000000 0.000000 0.000000 0.000000 0.000000 0.000000 0.000000 0.000000 0.000000 0.300000 0.000000 0.000000
0.000000 0.000000 0.700000 0.180000 0.000000 0.000000 0.000000 0.020000 0.040000 0.000000 0.000000 0.060000 0.000000 0.000000 0.000000 0.000000 0.000000 0.000000 0.000000 0.000000
0.120000 0.000000 0.100000 0.100000 0.000000 0.000000 0.000000 0.000000 0.080000 0.020000 0.000000 0.160000 0.000000 0.080000 0.200000 0.000000 0.100000 0.020000 0.020000 0.000000
0.220000 0.000000 0.000000 0.000000 0.000000 0.000000 0.000000 0.500000 0.000000 0.040000 0.120000 0.000000 0.000000 0.000000 0.000000 0.000000 0.000000 0.120000 0.000000 0.000000
0.000000 0.000000 0.000000 0.000000 0.000000 0.000000 0.000000 0.000000 0.960000 0.000000 0.000000 0.000000 0.000000 0.000000 0.040000 0.000000 0.000000 0.000000 0.000000 0.000000
0.360000 0.000000 0.060000 0.020000 0.000000 0.000000 0.020000 0.000000 0.040000 0.000000 0.000000 0.040000 0.000000 0.000000 0.020000 0.280000 0.160000 0.000000 0.000000 0.000000
0.380000 0.000000 0.020000 0.160000 0.000000 0.000000 0.000000 0.060000 0.100000 0.080000 0.000000 0.000000 0.000000 0.060000 0.060000 0.000000 0.000000 0.080000 0.000000 0.000000
0.000000 0.000000 0.000000 0.000000 0.000000 0.000000 0.000000 0.120000 0.000000 0.560000 0.020000 0.000000 0.000000 0.000000 0.000000 0.000000 0.000000 0.300000 0.000000 0.000000
0.000000 0.000000 0.000000 0.960000 0.000000 0.000000 0.040000 0.000000 0.000000 0.000000 0.000000 0.000000 0.000000 0.000000 0.000000 0.000000 0.000000 0.000000 0.000000 0.000000
0.160000 0.000000 0.000000 0.040000 0.000000 0.000000 0.000000 0.020000 0.280000 0.040000 0.000000 0.040000 0.000000 0.060000 0.180000 0.140000 0.020000 0.000000 0.000000 0.020000
0.240000 0.000000 0.000000 0.220000 0.000000 0.000000 0.020000 0.000000 0.060000 0.080000 0.000000 0.000000 0.000000 0.100000 0.020000 0.040000 0.040000 0.180000 0.000000 0.000000
0.000000 1.000000 0.000000 0.000000 0.000000 0.000000 0.000000 0.000000 0.000000 0.000000 0.000000 0.000000 0.000000 0.000000 0.000000 0.000000 0.000000 0.000000 0.000000 0.000000
0.000000 0.000000 0.000000 0.000000 0.000000 0.040000 0.000000 0.000000 0.000000 0.000000 0.000000 0.000000 0.960000 0.000000 0.000000 0.000000 0.000000 0.000000 0.000000 0.000000
0.000000 0.000000 0.000000 0.040000 0.000000 0.620000 0.000000 0.000000 0.100000 0.000000 0.000000 0.000000 0.000000 0.060000 0.080000 0.100000 0.000000 0.000000 0.000000 0.000000
0.000000 0.000000 0.000000 0.000000 0.000000 0.000000 0.000000 0.060000 0.020000 0.040000 0.000000 0.000000 0.000000 0.000000 0.020000 0.000000 0.320000 0.540000 0.000000 0.000000
0.000000 0.000000 0.000000 0.000000 0.000000 0.000000 0.000000 0.000000 0.000000 0.000000 0.000000 0.000000 0.000000 0.000000 0.000000 0.000000 0.000000 1.000000 0.000000 0.000000
0.000000 0.000000 0.000000 0.000000 0.000000 0.000000 0.000000 0.000000 0.000000 0.000000 0.000000 0.000000 0.000000 0.000000 0.000000 1.000000 0.000000 0.000000 0.000000 0.000000
0.000000 1.000000 0.000000 0.000000 0.000000 0.000000 0.000000 0.000000 0.000000 0.000000 0.000000 0.000000 0.000000 0.000000 0.000000 0.000000 0.000000 0.000000 0.000000 0.000000
0.860000 0.000000 0.000000 0.000000 0.000000 0.000000 0.000000 0.000000 0.000000 0.000000 0.000000 0.000000 0.000000 0.000000 0.000000 0.140000 0.000000 0.000000 0.000000 0.000000
0.000000 0.000000 1.000000 0.000000 0.000000 0.000000 0.000000 0.000000 0.000000 0.000000 0.000000 0.000000 0.000000 0.000000 0.000000 0.000000 0.000000 0.000000 0.000000 0.000000
0.000000 0.000000 0.000000 0.000000 0.000000 0.000000 0.000000 0.680000 0.000000 0.080000 0.040000 0.000000 0.000000 0.000000 0.000000 0.000000 0.000000 0.200000 0.000000 0.000000
0.000000 0.000000 0.000000 0.000000 0.000000 0.000000 0.000000 0.200000 0.000000 0.660000 0.000000 0.000000 0.000000 0.000000 0.000000 0.000000 0.000000 0.140000 0.000000 0.000000
0.660000 0.000000 0.000000 0.000000 0.000000 0.000000 0.000000 0.000000 0.000000 0.000000 0.000000 0.020000 0.000000 0.000000 0.000000 0.020000 0.260000 0.040000 0.000000 0.000000
0.040000 0.000000 0.000000 0.000000 0.000000 0.000000 0.000000 0.300000 0.000000 0.580000 0.020000 0.000000 0.000000 0.020000 0.000000 0.000000 0.000000 0.040000 0.000000 0.000000
0.720000 0.000000 0.000000 0.000000 0.000000 0.000000 0.000000 0.020000 0.000000 0.000000 0.000000 0.000000 0.000000 0.000000 0.000000 0.120000 0.040000 0.100000 0.000000 0.000000
0.800000 0.000000 0.000000 0.000000 0.000000 0.000000 0.000000 0.000000 0.000000 0.000000 0.000000 0.000000 0.000000 0.000000 0.000000 0.100000 0.100000 0.000000 0.000000 0.000000
0.000000 0.000000 0.000000 0.020000 0.000000 0.000000 0.000000 0.000000 0.000000 0.000000 0.000000 0.000000 0.000000 0.120000 0.860000 0.000000 0.000000 0.000000 0.000000 0.000000
0.020000 0.000000 0.740000 0.040000 0.000000 0.040000 0.000000 0.060000 0.020000 0.000000 0.000000 0.020000 0.000000 0.040000 0.000000 0.020000 0.000000 0.000000 0.000000 0.000000
0.400000 0.000000 0.000000 0.000000 0.020000 0.060000 0.000000 0.000000 0.000000 0.020000 0.000000 0.000000 0.000000 0.000000 0.000000 0.460000 0.000000 0.040000 0.000000 0.000000
0.000000 0.000000 0.000000 0.000000 0.000000 0.000000 0.000000 0.120000 0.000000 0.000000 0.000000 0.000000 0.000000 0.000000 0.000000 0.080000 0.120000 0.680000 0.000000 0.000000
0.040000 0.000000 0.020000 0.060000 0.060000 0.000000 0.040000 0.080000 0.000000 0.180000 0.000000 0.000000 0.000000 0.000000 0.000000 0.040000 0.100000 0.360000 0.000000 0.020000
0.140000 0.000000 0.000000 0.020000 0.040000 0.000000 0.000000 0.020000 0.000000 0.500000 0.080000 0.000000 0.000000 0.060000 0.000000 0.020000 0.020000 0.060000 0.000000 0.040000
0.220000 0.000000 0.000000 0.000000 0.000000 0.020000 0.000000 0.100000 0.000000 0.180000 0.000000 0.000000 0.000000 0.000000 0.000000 0.220000 0.140000 0.120000 0.000000 0.000000
0.000000 0.000000 0.040000 0.000000 0.000000 0.720000 0.000000 0.000000 0.100000 0.000000 0.000000 0.080000 0.000000 0.000000 0.040000 0.020000 0.000000 0.000000 0.000000 0.000000
0.020000 0.000000 0.000000 0.000000 0.000000 0.980000 0.000000 0.000000 0.000000 0.000000 0.000000 0.000000 0.000000 0.000000 0.000000 0.000000 0.000000 0.000000 0.000000 0.000000
0.000000 0.000000 0.000000 0.000000 0.000000 0.000000 0.000000 0.020000 0.000000 0.020000 0.000000 0.000000 0.960000 0.000000 0.000000 0.000000 0.000000 0.000000 0.000000 0.000000
0.020000 0.000000 0.040000 0.000000 0.040000 0.020000 0.020000 0.000000 0.060000 0.020000 0.000000 0.040000 0.000000 0.020000 0.060000 0.280000 0.020000 0.000000 0.180000 0.180000
0.000000 0.000000 0.000000 0.000000 0.020000 0.000000 0.000000 0.060000 0.000000 0.000000 0.000000 0.000000 0.000000 0.000000 0.000000 0.000000 0.000000 0.000000 0.660000 0.260000
--------------------------------------------------------------------------------
--------------------------------------------------------------------------------
	Motif GFEVIDRIKAALEKACPGVVSCADILALAARDSVVLAGGPSW MEME-1 regular expression
--------------------------------------------------------------------------------
GF[ED]V[IV]DR[IA]K[AS]A[LV]EK[AE]CPG[VT]VSCAD[IV][LI][AT][LI]AARD[SA]VVL[AS]GGPS[WY]
--------------------------------------------------------------------------------
Time 168.03 secs.
********************************************************************************
********************************************************************************
MOTIF KSCPNAEKIVRNVVKQAVKSDPRLAASLLRLHFHDCFVNGCDASILLDST MEME-2	width = 50 sites = 50 llr = 4383 E-value = 7.5e-1257
********************************************************************************
--------------------------------------------------------------------------------
	Motif KSCPNAEKIVRNVVKQAVKSDPRLAASLLRLHFHDCFVNGCDASILLDST MEME-2 Description
--------------------------------------------------------------------------------
Simplified A :::::5:1::::1:1:4:21::::882:::::::::::::::6::::111
pos.-specific C ::a::::::::::::::::::::::::::::::::a::::a:::::::::
probability D ::::1::2:::2:::1::::5:::::::::::::a::::::a:::::61:
matrix E 1:::::61:::11:111::11:::::::::::::::::1::::::::1::
F :::::12::::::::::2:::1:::::::::2a:::9:::::::::::::
G 1:::::::::1:::::::1:::1:1:1::::::::::::a::4:::::1:
H 1:::::::::::::::1:::1::::::::::6:a::::::::::::::1:
I ::::::::83:::3:::2:::::2:::23::::::::1::::::5:3:::
K 3:::1::2::12::221:21:::::::::::::::::::::::::::1::
L :::::11::::::1::12:::::2:::67:61::::::::::::197:::
M :::::::::::::1:::::::::2::::::3::::::::::::::1::::
N 1:::3::1:::2:::1:::11::1::::::::::::::4::::::::11:
P :::a:::::::::::::::::6:::21::::::::::::::::::::::1
Q 1:::1:::::1:1:12:1111:::::::::::::::::2:::::::::::
R 1:::1:::::51::1:::12:14::::::a::::::::2:::::::::::
S 15::1::2:::11:11::22::2:::4::::::::::::::::a::::32
T 13::1:::1:112111::1:1122:::1:::::::::::::::::::::5
V :::::3::17::362:13:::::1:::::::::::::8::::::4:::::
W ::::::::::::::::::::::::::::::::::::::::::::::::::
Y ::::::::::::::::11::::::::::::::::::::::::::::::::
bits 7.8
7
6.3
5.5 * * * *
Relative 4.7 * * * *
Entropy 3.9 ** * ****** ***
(126.5 bits) 3.1 ** ** * * ******* ***** *
2.3 *** ** ** * * ** *********** ********
1.6 *** ** *** * ** **************************** *
0.8 **************************************************
0.0 --------------------------------------------------
Multilevel KSCPNAEKIVRXVVXQAVKRDPRIAASLLRLHFHDCFVNGCDASILLDST
consensus T V I TI S TL A I MF R G V I S
sequence M
--------------------------------------------------------------------------------
--------------------------------------------------------------------------------
	Motif KSCPNAEKIVRNVVKQAVKSDPRLAASLLRLHFHDCFVNGCDASILLDST MEME-2 sites sorted by position p-value
--------------------------------------------------------------------------------
Sequence name Start P-value Site
------------- ----- --------- --------------------------------------------------
Bra029933.1 35 1.98e-45 DAQLTPTFYD SSCPNVTNIVRETIVNELRSDPRIAASILRLHFHDCFVNGCDASILLDNT TSFRTEKDAA
Bra008291.1 31 1.18e-44 KAQLQFGFYS KTCPSAESIVRKVVQQAVTRDPGNAAVLLRLHFHDCFVEGCDGSILIKHA VNDDERFAAG
Bra018007.1 40 1.38e-44 DAQLTPTFYD TSCPNVTNIVRDTIVDELRSDPRIAASILRLHFHDCFVNGCDASILLDNS TSFRTEKDAG
Bra037877.1 38 1.89e-44 HAQLSTSFYD KTCPQVFDIATNTIVNALRSDPRIAASILRLHFHDCFVNGCDASILLDNT TSFRTEKDAF
Bra023862.1 36 3.51e-44 DAQLQMNFYA KSCPNAEKIISDHIQKHIHNGPSLAAPLIRMHFHDCFVRGCDGSVLINST SGNAERDAPP
Bra011683.1 429 8.75e-44 GGKLNPGFYA HSCPQAGEIVRSVVAQAVARETRMAASLMRLHFHDCFVQGCDGSLLLDSS GRIVSEKSSN
Bra039920.1 42 1.02e-43 EGNLFPGFYR SSCPRAEEIVRSVVAQAVAREARMAASLMRLHFHDCFVQGCDGSLLLDSS GSIITEKGSN
Bra015695.1 49 1.18e-43 AQQLQFGFYS ETCPSAESIVGDVVKQAVTKDPRNAAVLLRLHFHDCFVEGCDGSILIKHE VNDDERFAPG
Bra031309.1 33 1.18e-43 DAQLQMNFYA KSCPKAEKIISDHIEKHIHNGPSLAAPLIRMHFHDCFVRGCDGSVLINST SGNAEKDAPP
Bra000058.1 38 2.87e-43 NAQLRPDFYF GTCPHVFDIIGNVIVDELASDPRIAASILRLHFHDCFVNGCDASILLDNS TSFRTEKDAA
Bra036330.1 53 3.32e-43 SSGLFPQFYQ FSCPQADEIVMTVLEKAIARNPRMAASLLRLHFHDCFVQGCDASILLDDS ATIKSERNAG
Bra035235.1 32 3.84e-43 EAQLKLGFYD KTCPNAEKIVQAVVNQHIRNVPSLAAGLIRMHFHDCFVRGCDGSILINAT SSNQQVEKVA
Bra015404.1 33 1.05e-42 QAQLQMNFYA NTCPNAEKIVQDFVSNHISNAPSLAAALLRMHFHDCFVRGCDGSVLINST SGNAEKDAAP
Bra015403.1 33 1.84e-42 PKGLYLNYYK HRCPDAESIVRRVTVQYVSHEPSLAAALLRMHFHDCFVRGCDGSILLKYP YNETERYAAP
Bra017121.1 38 3.69e-42 NAQLRPDFYF RTCRQVFDIIGNVIVDELSSDPRIAASLLRLHFHDCFVNGCDASILLDNS TSFRTEKDAA
Bra017120.1 38 4.24e-42 NAQLRPDFYF RTCPGVFLIVGKVIVEELGSDPRIAASLLRLHFHDCFVNGCDASVLLDNS TSFRSEKDAA
Bra012061.1 40 5.57e-42 GGYLFPQFYD HSCPKAQEIVQLIVAKAFAQDPRMPASLLRLHFHDCFVKGCDASILLDNS GSIISEKRSN
Bra009220.1 42 7.32e-42 NAQLNATFYS GTCPNASAIVRTTIQQALQSDSRIGASLIRLHFHDCFVNGCDASILLDDS GSIQSEKNAG
Bra032476.1 32 2.79e-41 GDLYEGYYRY NNCPQMEDIVRNVTYHYIYKDPTLAAALLRMHFHDCFVRGCDGSVLIKSP NNDAERDAIP
Bra032477.1 33 3.18e-41 PKGLDLNYYK HRCPDAEAIVRRTTVQYVSRQTSLAAALLRMHFHDCFVRGCDGSILLKSP TKDAERDAIP
Bra016930.1 34 4.13e-41 SQSLKNGYYS TSCPKAESIVRSTVESHFDSDPTISPGLLRLHFHDCFVQGCDGSVLIKGK SAEQAALASS
Bra037007.1 23 6.95e-41 VMGLSMSYYM MSCPAAEQIVTNTVNNALRADPTLAAGLIRMLFHDCFIEGCDASILLDST KDNTAEKDSP
Bra006769.1 35 7.91e-41 HAQLSSDFYK ESCPSLFYAVRREVQRAVTRERRMAASLLRLFFHDCFVNGCDGSILLDDT SSSMGEKTAG
Bra020072.1 30 1.02e-40 KAQLNPNIYA KSCPYLVLIVRRQVMNALKADTRMAASLIRLHFHDCFVNGCDASVLLDGD DSEKLAIPNL
Bra026207.1 29 2.82e-40 QAQLSPTFYD QSCPNALSTIRSSIRTAISRERRMAASLIRLHFHDCFVNGCDASVMLVAT PTMESERDAV
Bra037849.1 34 8.60e-40 TAQLKPNFYG KSCPNVEAIVKKVVQQKVKETFVTIPATLRLFFHDCFVNGCDASVLIQST PNNKAEKDHP
Bra004343.1 36 9.72e-40 DLPLTLDYYK STCPTVFDVIKKEMECIVKEDPRNAAIVIRLHFHDCFVQGCDASVLLDET ETLQGEKKAS
Bra028761.1 37 9.72e-40 KAQLTTNFYS TSCPNLLSTVKSGVKSAVSSQPRMGASILRLFFHDCFVNGCDGSILLDDT SSFTGEQNAG
Bra004014.1 35 1.10e-39 DFPLTLDYYK STCPTVFDVVKKEMECIVKEDPRNAAILIRFHFHDCFVQGCDGSVLLDET ETFQGEKKAS
Bra023509.1 40 2.01e-39 AQGLKVGFYD KTCPKAEAIVKKSVSDAMKNDPTIGAPLLRMFFHDCFVRGCDGSVLLELK NKKDEKNAPP
Bra020370.1 28 2.01e-39 QAQLSSDFYA ESCPSLFPAVRRVMQRAVAKERRMAASLLRLFFHDCFINGCDGSILLDDT SSFRGEKTAG
Bra024102.1 34 2.27e-39 SAQLRTGFYQ NSCPNVESIVRNAVRQKFQQTFVTAPATLRLFFHDCFVRGCDASILIASP SEKDHPDDMS
Bra011771.1 31 7.44e-39 SAQLRSNFYA GSCPNVEKIVRDAVQKKVQQTFTTIPATLRLYFHDCFVNGCDASVMIAST GNNKAEKDHP
Bra026822.1 28 1.06e-38 QAQLSPTFYD QICPNALSTIRSSIRTAISRERRMAASLIRLHFHDCFVNGCDASVMLVAT PTMESERDSV
Bra028285.1 33 1.06e-38 EAALNAHYYD RSCPAAEKVILETVKKAILHDPKVHARLLRMFFHDCFIRGCDASILLDST KSNQAEKDGP
Bra003918.1 54 1.33e-38 VKGLSWSFYQ KACPKVEKIIRKELKKVFKRDIGLAAAILRIHFHDCFVQGCEGSVLLDGS ASGPGEQSSI
Bra016127.1 54 1.68e-38 VKGLSWSFYQ KACPKVESIIRKELKKVFKRDIGLAAAILRIHFHDCFVQGCEASVLLDGS ASGPGEQSSI
Bra022567.1 33 4.20e-38 EAALDAHYYD RSCPVAEKIILETVKNATLYDPKVPARLLRMFFHDCFIRGCDASILLDST MSTQAEKDGP
Bra001084.1 30 1.61e-37 FSQLRVGFYS QSCPNAEIIVQNLVRERFGLDPSITAALTRMHFHDCFVQGCDASLLIDPT TTQPSPEKNA
Bra039872.1 51 2.01e-37 DNLLSLNYYD KSCPNFEKIVDNKVRQWTKSDPSLGPALLRLLFHDCGVTGCDASVLLDHE GSERRSPASK
Bra031933.1 33 1.02e-36 GQATRVGFYS TTCPTAETIVRNAVTAGFNSNPRIAPGILRMHFHDCFVLGCDGSILISGA NTEQTARSNV
Bra005850.1 37 4.48e-36 EAQLSQGFYS SSCPLLLPIVRTAVTSAVAFDPRMGASLLRLFYLDCFVNGCDASILLDDT SSFTGEQNAA
Bra039059.1 38 6.11e-36 DSRLTTDFYS KSCPRFLDIVRDTISDKQITHPTTAAAVIRLFFHDCFPNGCDASILVSST AFNVAERDSS
Bra020191.1 35 1.14e-34 YGELRLGFYS KSCPGVEETVFRVVKKAFSDNSTLAPLMIRLYFHDCFSNGCDASLLLDST TSPTEKKAGP
Bra022090.1 37 1.87e-34 VAILRTDYYQ KTCPDFNKIVRDAVIAKQGQQPTTAAGTLRLFFHDCFLEGCDASVLIATN SFNKAERDDD
Bra011475.1 79 2.06e-34 SYSLHYDFYQ DSCPTAERIITIGIREVYAAKPSVAPSLIRLLFHDCFIEGCDASVLLDAD ESLTSEKEAS
Bra013576.1 39 2.99e-33 EPGLMMNFYK DTCPQAEDIIREQVKLLYKRHKNTAFSWLRNIFHDCAVESCDASLLLDST RRELGEKEHD
Bra037713.1 44 3.88e-32 KLTWHFYKVY NTCENAENFVRHQVEILYKNDTTIAPKLLRLLYSDCFVTGCDASVLLEGP NSERNAPQNR
Bra024635.1 30 1.47e-31 QADLSSDYYS KTCPDFDQTLVQVVTDKQIAAPTTAAGTLRLFFHDCMVDGCDASILVAST SGKTSERDAD
Bra023099.1 38 3.85e-31 NAELEMNYYR ESCPRAEEIIRQQVETLYYKHGNTAVSWLRNLFHDCVVKSCDASLLLETA RGVESEQKST
--------------------------------------------------------------------------------
--------------------------------------------------------------------------------
	Motif KSCPNAEKIVRNVVKQAVKSDPRLAASLLRLHFHDCFVNGCDASILLDST MEME-2 block diagrams
--------------------------------------------------------------------------------
SEQUENCE NAME POSITION P-VALUE MOTIF DIAGRAM
------------- ---------------- -------------
Bra029933.1 2e-45 34_[2]_265
Bra008291.1 1.2e-44 30_[2]_239
Bra018007.1 1.4e-44 39_[2]_264
Bra037877.1 1.9e-44 37_[2]_265
Bra023862.1 3.5e-44 35_[2]_244
Bra011683.1 8.7e-44 428_[2]_245
Bra039920.1 1e-43 41_[2]_245
Bra015695.1 1.2e-43 48_[2]_239
Bra031309.1 1.2e-43 32_[2]_244
Bra000058.1 2.9e-43 37_[2]_263
Bra036330.1 3.3e-43 52_[2]_245
Bra035235.1 3.8e-43 31_[2]_245
Bra015404.1 1e-42 32_[2]_244
Bra015403.1 1.8e-42 32_[2]_238
Bra017121.1 3.7e-42 37_[2]_263
Bra017120.1 4.2e-42 37_[2]_263
Bra012061.1 5.6e-42 39_[2]_221
Bra009220.1 7.3e-42 41_[2]_247
Bra032476.1 2.8e-41 31_[2]_239
Bra032477.1 3.2e-41 32_[2]_239
Bra016930.1 4.1e-41 33_[2]_243
Bra037007.1 6.9e-41 22_[2]_232
Bra006769.1 7.9e-41 34_[2]_281
Bra020072.1 1e-40 29_[2]_245
Bra026207.1 2.8e-40 28_[2]_239
Bra037849.1 8.6e-40 33_[2]_246
Bra004343.1 9.7e-40 35_[2]_250
Bra028761.1 9.7e-40 36_[2]_238
Bra004014.1 1.1e-39 34_[2]_250
Bra023509.1 2e-39 39_[2]_241
Bra020370.1 2e-39 27_[2]_239
Bra024102.1 2.3e-39 33_[2]_242
Bra011771.1 7.4e-39 30_[2]_246
Bra026822.1 1.1e-38 27_[2]_211
Bra028285.1 1.1e-38 32_[2]_240
Bra003918.1 1.3e-38 53_[2]_259
Bra016127.1 1.7e-38 53_[2]_259
Bra022567.1 4.2e-38 32_[2]_240
Bra001084.1 1.6e-37 29_[2]_244
Bra039872.1 2e-37 50_[2]_242
Bra031933.1 1e-36 32_[2]_237
Bra005850.1 4.5e-36 36_[2]_238
Bra039059.1 6.1e-36 37_[2]_239
Bra020191.1 1.1e-34 34_[2]_249
Bra022090.1 1.9e-34 36_[2]_245
Bra011475.1 2.1e-34 78_[2]_273
Bra013576.1 3e-33 38_[2]_243
Bra037713.1 3.9e-32 43_[2]_242
Bra024635.1 1.5e-31 29_[2]_252
Bra023099.1 3.9e-31 37_[2]_243
--------------------------------------------------------------------------------
--------------------------------------------------------------------------------
	Motif KSCPNAEKIVRNVVKQAVKSDPRLAASLLRLHFHDCFVNGCDASILLDST MEME-2 in BLOCKS format
--------------------------------------------------------------------------------
BL MOTIF KSCPNAEKIVRNVVKQAVKSDPRLAASLLRLHFHDCFVNGCDASILLDST width=50 seqs=50
Bra029933.1 ( 35) SSCPNVTNIVRETIVNELRSDPRIAASILRLHFHDCFVNGCDASILLDNT 1
Bra008291.1 ( 31) KTCPSAESIVRKVVQQAVTRDPGNAAVLLRLHFHDCFVEGCDGSILIKHA 1
Bra018007.1 ( 40) TSCPNVTNIVRDTIVDELRSDPRIAASILRLHFHDCFVNGCDASILLDNS 1
Bra037877.1 ( 38) KTCPQVFDIATNTIVNALRSDPRIAASILRLHFHDCFVNGCDASILLDNT 1
Bra023862.1 ( 36) KSCPNAEKIISDHIQKHIHNGPSLAAPLIRMHFHDCFVRGCDGSVLINST 1
Bra011683.1 ( 429) HSCPQAGEIVRSVVAQAVARETRMAASLMRLHFHDCFVQGCDGSLLLDSS 1
Bra039920.1 ( 42) SSCPRAEEIVRSVVAQAVAREARMAASLMRLHFHDCFVQGCDGSLLLDSS 1
Bra015695.1 ( 49) ETCPSAESIVGDVVKQAVTKDPRNAAVLLRLHFHDCFVEGCDGSILIKHE 1
Bra031309.1 ( 33) KSCPKAEKIISDHIEKHIHNGPSLAAPLIRMHFHDCFVRGCDGSVLINST 1
Bra000058.1 ( 38) GTCPHVFDIIGNVIVDELASDPRIAASILRLHFHDCFVNGCDASILLDNS 1
Bra036330.1 ( 53) FSCPQADEIVMTVLEKAIARNPRMAASLLRLHFHDCFVQGCDASILLDDS 1
Bra035235.1 ( 32) KTCPNAEKIVQAVVNQHIRNVPSLAAGLIRMHFHDCFVRGCDGSILINAT 1
Bra015404.1 ( 33) NTCPNAEKIVQDFVSNHISNAPSLAAALLRMHFHDCFVRGCDGSVLINST 1
Bra015403.1 ( 33) HRCPDAESIVRRVTVQYVSHEPSLAAALLRMHFHDCFVRGCDGSILLKYP 1
Bra017121.1 ( 38) RTCRQVFDIIGNVIVDELSSDPRIAASLLRLHFHDCFVNGCDASILLDNS 1
Bra017120.1 ( 38) RTCPGVFLIVGKVIVEELGSDPRIAASLLRLHFHDCFVNGCDASVLLDNS 1
Bra012061.1 ( 40) HSCPKAQEIVQLIVAKAFAQDPRMPASLLRLHFHDCFVKGCDASILLDNS 1
Bra009220.1 ( 42) GTCPNASAIVRTTIQQALQSDSRIGASLIRLHFHDCFVNGCDASILLDDS 1
Bra032476.1 ( 32) NNCPQMEDIVRNVTYHYIYKDPTLAAALLRMHFHDCFVRGCDGSVLIKSP 1
Bra032477.1 ( 33) HRCPDAEAIVRRTTVQYVSRQTSLAAALLRMHFHDCFVRGCDGSILLKSP 1
Bra016930.1 ( 34) TSCPKAESIVRSTVESHFDSDPTISPGLLRLHFHDCFVQGCDGSVLIKGK 1
Bra037007.1 ( 23) MSCPAAEQIVTNTVNNALRADPTLAAGLIRMLFHDCFIEGCDASILLDST 1
Bra006769.1 ( 35) ESCPSLFYAVRREVQRAVTRERRMAASLLRLFFHDCFVNGCDGSILLDDT 1
Bra020072.1 ( 30) KSCPYLVLIVRRQVMNALKADTRMAASLIRLHFHDCFVNGCDASVLLDGD 1
Bra026207.1 ( 29) QSCPNALSTIRSSIRTAISRERRMAASLIRLHFHDCFVNGCDASVMLVAT 1
Bra037849.1 ( 34) KSCPNVEAIVKKVVQQKVKETFVTIPATLRLFFHDCFVNGCDASVLIQST 1
Bra004343.1 ( 36) STCPTVFDVIKKEMECIVKEDPRNAAIVIRLHFHDCFVQGCDASVLLDET 1
Bra028761.1 ( 37) TSCPNLLSTVKSGVKSAVSSQPRMGASILRLFFHDCFVNGCDGSILLDDT 1
Bra004014.1 ( 35) STCPTVFDVVKKEMECIVKEDPRNAAILIRFHFHDCFVQGCDGSVLLDET 1
Bra023509.1 ( 40) KTCPKAEAIVKKSVSDAMKNDPTIGAPLLRMFFHDCFVRGCDGSVLLELK 1
Bra020370.1 ( 28) ESCPSLFPAVRRVMQRAVAKERRMAASLLRLFFHDCFINGCDGSILLDDT 1
Bra024102.1 ( 34) NSCPNVESIVRNAVRQKFQQTFVTAPATLRLFFHDCFVRGCDASILIASP 1
Bra011771.1 ( 31) GSCPNVEKIVRDAVQKKVQQTFTTIPATLRLYFHDCFVNGCDASVMIAST 1
Bra026822.1 ( 28) QICPNALSTIRSSIRTAISRERRMAASLIRLHFHDCFVNGCDASVMLVAT 1
Bra028285.1 ( 33) RSCPAAEKVILETVKKAILHDPKVHARLLRMFFHDCFIRGCDASILLDST 1
Bra003918.1 ( 54) KACPKVEKIIRKELKKVFKRDIGLAAAILRIHFHDCFVQGCEGSVLLDGS 1
Bra016127.1 ( 54) KACPKVESIIRKELKKVFKRDIGLAAAILRIHFHDCFVQGCEASVLLDGS 1
Bra022567.1 ( 33) RSCPVAEKIILETVKNATLYDPKVPARLLRMFFHDCFIRGCDASILLDST 1
Bra001084.1 ( 30) QSCPNAEIIVQNLVRERFGLDPSITAALTRMHFHDCFVQGCDASLLIDPT 1
Bra039872.1 ( 51) KSCPNFEKIVDNKVRQWTKSDPSLGPALLRLLFHDCGVTGCDASVLLDHE 1
Bra031933.1 ( 33) TTCPTAETIVRNAVTAGFNSNPRIAPGILRMHFHDCFVLGCDGSILISGA 1
Bra005850.1 ( 37) SSCPLLLPIVRTAVTSAVAFDPRMGASLLRLFYLDCFVNGCDASILLDDT 1
Bra039059.1 ( 38) KSCPRFLDIVRDTISDKQITHPTTAAAVIRLFFHDCFPNGCDASILVSST 1
Bra020191.1 ( 35) KSCPGVEETVFRVVKKAFSDNSTLAPLMIRLYFHDCFSNGCDASLLLDST 1
Bra022090.1 ( 37) KTCPDFNKIVRDAVIAKQGQQPTTAAGTLRLFFHDCFLEGCDASVLIATN 1
Bra011475.1 ( 79) DSCPTAERIITIGIREVYAAKPSVAPSLIRLLFHDCFIEGCDASVLLDAD 1
Bra013576.1 ( 39) DTCPQAEDIIREQVKLLYKRHKNTAFSWLRNIFHDCAVESCDASLLLDST 1
Bra037713.1 ( 44) NTCENAENFVRHQVEILYKNDTTIAPKLLRLLYSDCFVTGCDASVLLEGP 1
Bra024635.1 ( 30) KTCPDFDQTLVQVVTDKQIAAPTTAAGTLRLFFHDCMVDGCDASILVAST 1
Bra023099.1 ( 38) ESCPRAEEIIRQQVETLYYKHGNTAVSWLRNLFHDCVVKSCDASLLLETA 1
//
--------------------------------------------------------------------------------
--------------------------------------------------------------------------------
	Motif KSCPNAEKIVRNVVKQAVKSDPRLAASLLRLHFHDCFVNGCDASILLDST MEME-2 position-specific scoring matrix
--------------------------------------------------------------------------------
log-odds matrix: alength= 20 w= 50 n= 33341 bayes= 10.5131 E= 7.5e-1257
-273 -475 -59 111 -145 -31 212 -387 250 -404 -11 50 -359 103 34 16 49 -382 -269 -299
-123 -296 -419 -376 -444 -397 -323 -182 -329 -449 -325 -147 -373 -339 -126 280 217 -446 -260 -336
-476 526 -632 -509 -595 -615 -494 -482 -590 -571 -460 -599 -599 -543 -586 -579 -472 -567 -454 -554
-321 -507 -474 -103 -547 -475 -372 -466 -379 -478 -438 -482 436 -347 -175 -389 -381 -461 -401 -488
-80 -475 26 -135 -461 -83 36 -387 130 -207 -295 228 -359 190 -1 -12 49 -169 -269 -15
262 -547 -829 -670 58 -727 -588 -258 -685 19 8 -728 -691 -591 -709 -681 -522 193 -373 -476
-308 -509 -55 372 143 -169 -231 -405 -202 -6 -328 -116 -394 -21 -311 -171 -40 -171 -309 -341
0 -475 118 161 -461 -373 -188 -124 196 -126 -295 14 -23 57 -119 92 -107 -382 -269 -15
-103 -515 -787 -667 -141 -741 -687 397 -688 -387 -367 -722 -722 -677 -767 -696 78 4 -532 -564
-195 -531 -848 -727 -596 -809 -792 254 -764 -201 -414 -791 -772 -767 -854 -780 -523 321 -634 -638
-277 -475 -135 -141 -145 7 -192 -383 108 -126 -10 -269 -363 138 289 -92 13 -168 -271 -302
-146 -475 118 111 -461 -373 36 -124 167 -207 -295 158 -359 57 87 39 13 -382 -269 -299
27 -441 -320 136 -140 -84 119 -109 -65 -195 -267 -287 -375 136 -287 -49 171 189 -255 -296
-543 -529 -839 -709 -556 -786 -727 243 -740 -61 145 -770 -752 -717 -813 -749 8 294 -552 -594
-35 -475 -293 180 -461 -373 -188 -124 167 -404 -11 -34 -359 210 87 -46 13 99 -269 -15
-80 46 79 78 -461 -373 36 -124 182 -207 -295 103 -359 271 -48 -46 13 -382 -269 -299
215 -414 -352 133 -401 -170 243 -20 126 -64 -245 -314 -394 -199 -133 -320 -272 -22 205 132
-333 -360 -594 -429 150 -488 -352 186 -437 88 14 -479 -482 88 -474 -423 -38 190 -217 177
88 -475 -133 -135 -461 -31 120 -36 196 -126 -295 -108 -359 103 63 76 13 -382 -269 75
0 -475 -133 78 -145 -373 120 -387 81 -207 -295 103 -359 138 168 119 -107 -382 -269 -15
-85 -510 280 184 -498 -83 174 -423 -68 -440 -332 15 -388 101 -300 -310 11 -174 -306 -334
-170 -493 -460 -345 -16 -195 -358 -56 -133 -463 -423 -468 390 -332 5 -124 24 -446 -388 -474
-443 -593 -431 -313 -647 -28 -302 -535 8 -545 -449 -39 -521 -258 276 96 177 -88 -398 -450
-405 -425 -672 -510 -397 -571 -439 228 -520 129 328 46 -560 -468 -559 -509 145 -6 -294 -369
320 -216 -471 -338 -423 4 -32 -72 -380 -375 -272 -435 -78 -363 -427 -132 -145 -222 -244 -376
324 -451 -751 -654 -142 -452 -615 -603 -709 -669 -572 -636 197 -595 -703 -405 -435 -176 -519 -614
146 -391 -419 -260 -383 64 -276 -12 -95 -175 -230 -368 32 -257 -61 211 -289 -62 -239 -299
-487 -486 -686 -514 -344 -639 -462 156 -531 276 14 -611 -553 -441 -544 -581 61 -81 293 -398
-626 -603 -879 -709 -394 -811 -623 238 -728 280 97 -800 -712 -594 -727 -783 -150 -397 -372 -499
-809 -752 -831 -797 -873 -752 -604 -840 -597 -839 -814 -792 -736 -662 401 -833 -797 -907 -554 -743
-602 -584 -826 -653 -125 -771 -579 -14 -672 273 350 -57 -669 -551 -674 -732 -570 -398 -350 -474
-738 -655 -805 -715 218 -767 511 -124 -701 4 -494 -654 -735 -584 -691 -717 -681 -621 -153 117
-581 -507 -679 -584 414 -664 -359 -441 -611 -402 -403 -607 -603 -551 -641 -582 -595 -505 -136 103
-542 -560 -545 -503 -488 -585 578 -619 -582 -229 -486 -387 -580 -285 -467 -211 -513 -608 -310 -247
-884 -840 395 -689 -910 -777 -718 -939 -864 -920 -917 -751 -797 -813 -870 -892 -866 -951 -638 -789
-476 526 -632 -509 -595 -615 -494 -482 -590 -571 -460 -599 -599 -543 -586 -579 -472 -567 -454 -554
-266 -326 -512 -412 405 -287 -379 -257 -460 -214 -83 -494 -432 -449 -523 -409 -442 -225 -67 -48
-178 -270 -440 -319 -377 -449 -295 81 -368 -204 -230 -436 -180 -356 -385 -258 -213 345 -272 -397
-346 -542 -142 163 -542 -432 -245 -456 6 -215 -364 259 -428 247 174 -353 -42 -451 -333 -369
-360 -518 -445 -420 -629 373 -420 -572 -444 -642 -507 -409 -523 -470 -489 -136 -488 -555 -355 -491
-476 526 -632 -509 -595 -615 -494 -482 -590 -571 -460 -599 -599 -543 -586 -579 -472 -567 -454 -554
-404 -478 381 -3 -516 -439 -271 -447 -418 -510 -424 -175 -505 -359 -470 -418 -430 -464 -294 -375
292 -510 -788 -711 -780 241 -662 -729 -764 -765 -657 -687 -614 -649 -752 -464 -493 -610 -575 -708
-769 -804 -880 -881 -923 -758 -757 -971 -899 -935 -934 -896 -791 -840 -890 350 -823 -935 -651 -812
-559 -539 -861 -739 -574 -819 -799 329 -775 32 -395 -801 -781 -764 -865 -792 -533 247 -603 -629
-622 -601 -852 -682 -388 -791 -602 -285 -701 325 149 -779 -691 -573 -700 -761 -591 -413 -362 -489
-605 -581 -904 -762 -456 -840 -713 252 -790 278 -290 -833 -769 -682 -819 -823 -578 -61 -448 -558
-5 -583 302 90 -579 -430 -279 -498 126 -516 -412 53 -443 -32 -377 -104 -355 -90 -386 -408
-1 -490 81 32 -479 64 174 -406 -177 -210 -315 126 -110 -163 -282 180 -36 -401 -287 -15
-51 -469 -70 4 -553 -447 -308 -429 -29 -522 -374 -116 97 -291 -412 120 311 -430 -361 -425
--------------------------------------------------------------------------------
--------------------------------------------------------------------------------
	Motif KSCPNAEKIVRNVVKQAVKSDPRLAASLLRLHFHDCFVNGCDASILLDST MEME-2 position-specific probability matrix
--------------------------------------------------------------------------------
letter-probability matrix: alength= 20 w= 50 nsites= 50 E= 7.5e-1257
0.000000 0.000000 0.040000 0.080000 0.020000 0.060000 0.080000 0.000000 0.300000 0.000000 0.020000 0.080000 0.000000 0.060000 0.080000 0.100000 0.080000 0.000000 0.000000 0.000000
0.040000 0.000000 0.000000 0.000000 0.000000 0.000000 0.000000 0.020000 0.000000 0.000000 0.000000 0.020000 0.000000 0.000000 0.040000 0.540000 0.340000 0.000000 0.000000 0.000000
0.000000 1.000000 0.000000 0.000000 0.000000 0.000000 0.000000 0.000000 0.000000 0.000000 0.000000 0.000000 0.000000 0.000000 0.000000 0.000000 0.000000 0.000000 0.000000 0.000000
0.000000 0.000000 0.000000 0.020000 0.000000 0.000000 0.000000 0.000000 0.000000 0.000000 0.000000 0.000000 0.960000 0.000000 0.020000 0.000000 0.000000 0.000000 0.000000 0.000000
0.040000 0.000000 0.080000 0.000000 0.000000 0.040000 0.020000 0.000000 0.120000 0.020000 0.000000 0.300000 0.000000 0.120000 0.060000 0.080000 0.080000 0.020000 0.000000 0.020000
0.520000 0.000000 0.000000 0.000000 0.080000 0.000000 0.000000 0.000000 0.000000 0.100000 0.020000 0.000000 0.000000 0.000000 0.000000 0.000000 0.000000 0.280000 0.000000 0.000000
0.000000 0.000000 0.040000 0.560000 0.160000 0.020000 0.000000 0.000000 0.000000 0.100000 0.000000 0.020000 0.000000 0.020000 0.000000 0.020000 0.040000 0.020000 0.000000 0.000000
0.080000 0.000000 0.160000 0.120000 0.000000 0.000000 0.000000 0.020000 0.200000 0.040000 0.000000 0.060000 0.040000 0.040000 0.020000 0.180000 0.020000 0.000000 0.000000 0.020000
0.040000 0.000000 0.000000 0.000000 0.020000 0.000000 0.000000 0.780000 0.000000 0.000000 0.000000 0.000000 0.000000 0.000000 0.000000 0.000000 0.100000 0.060000 0.000000 0.000000
0.020000 0.000000 0.000000 0.000000 0.000000 0.000000 0.000000 0.280000 0.000000 0.020000 0.000000 0.000000 0.000000 0.000000 0.000000 0.000000 0.000000 0.680000 0.000000 0.000000
0.000000 0.000000 0.020000 0.000000 0.020000 0.080000 0.000000 0.000000 0.100000 0.040000 0.020000 0.000000 0.000000 0.080000 0.520000 0.040000 0.060000 0.020000 0.000000 0.000000
0.020000 0.000000 0.160000 0.080000 0.000000 0.000000 0.020000 0.020000 0.160000 0.020000 0.000000 0.180000 0.000000 0.040000 0.120000 0.120000 0.060000 0.000000 0.000000 0.000000
0.100000 0.000000 0.000000 0.100000 0.020000 0.040000 0.040000 0.020000 0.020000 0.020000 0.000000 0.000000 0.000000 0.080000 0.000000 0.060000 0.200000 0.300000 0.000000 0.000000
0.000000 0.000000 0.000000 0.000000 0.000000 0.000000 0.000000 0.260000 0.000000 0.060000 0.060000 0.000000 0.000000 0.000000 0.000000 0.000000 0.060000 0.560000 0.000000 0.000000
0.060000 0.000000 0.000000 0.140000 0.000000 0.000000 0.000000 0.020000 0.160000 0.000000 0.020000 0.040000 0.000000 0.140000 0.120000 0.060000 0.060000 0.160000 0.000000 0.020000
0.040000 0.040000 0.120000 0.060000 0.000000 0.000000 0.020000 0.020000 0.180000 0.020000 0.000000 0.120000 0.000000 0.220000 0.040000 0.060000 0.060000 0.000000 0.000000 0.000000
0.400000 0.000000 0.000000 0.100000 0.000000 0.020000 0.100000 0.040000 0.120000 0.060000 0.000000 0.000000 0.000000 0.000000 0.020000 0.000000 0.000000 0.060000 0.020000 0.060000
0.000000 0.000000 0.000000 0.000000 0.160000 0.000000 0.000000 0.180000 0.000000 0.180000 0.020000 0.000000 0.000000 0.060000 0.000000 0.000000 0.040000 0.280000 0.000000 0.080000
0.160000 0.000000 0.020000 0.000000 0.000000 0.060000 0.040000 0.040000 0.200000 0.040000 0.000000 0.020000 0.000000 0.060000 0.100000 0.160000 0.060000 0.000000 0.000000 0.040000
0.080000 0.000000 0.020000 0.060000 0.020000 0.000000 0.040000 0.000000 0.080000 0.020000 0.000000 0.120000 0.000000 0.080000 0.220000 0.220000 0.020000 0.000000 0.000000 0.020000
0.040000 0.000000 0.500000 0.140000 0.000000 0.040000 0.060000 0.000000 0.020000 0.000000 0.000000 0.060000 0.000000 0.060000 0.000000 0.000000 0.060000 0.020000 0.000000 0.000000
0.020000 0.000000 0.000000 0.000000 0.060000 0.020000 0.000000 0.040000 0.020000 0.000000 0.000000 0.000000 0.640000 0.000000 0.080000 0.040000 0.080000 0.000000 0.000000 0.000000
0.000000 0.000000 0.000000 0.000000 0.000000 0.060000 0.000000 0.000000 0.040000 0.000000 0.000000 0.040000 0.000000 0.000000 0.440000 0.180000 0.200000 0.040000 0.000000 0.000000
0.000000 0.000000 0.000000 0.000000 0.000000 0.000000 0.000000 0.240000 0.000000 0.240000 0.220000 0.080000 0.000000 0.000000 0.000000 0.000000 0.160000 0.060000 0.000000 0.000000
0.760000 0.000000 0.000000 0.000000 0.000000 0.100000 0.020000 0.040000 0.000000 0.000000 0.000000 0.000000 0.040000 0.000000 0.000000 0.020000 0.020000 0.000000 0.000000 0.000000
0.780000 0.000000 0.000000 0.000000 0.020000 0.000000 0.000000 0.000000 0.000000 0.000000 0.000000 0.000000 0.180000 0.000000 0.000000 0.000000 0.000000 0.020000 0.000000 0.000000
0.240000 0.000000 0.000000 0.000000 0.000000 0.120000 0.000000 0.040000 0.020000 0.020000 0.000000 0.000000 0.060000 0.000000 0.040000 0.420000 0.000000 0.040000 0.000000 0.000000
0.000000 0.000000 0.000000 0.000000 0.000000 0.000000 0.000000 0.160000 0.000000 0.640000 0.020000 0.000000 0.000000 0.000000 0.000000 0.000000 0.100000 0.040000 0.040000 0.000000
0.000000 0.000000 0.000000 0.000000 0.000000 0.000000 0.000000 0.260000 0.000000 0.680000 0.040000 0.000000 0.000000 0.000000 0.000000 0.000000 0.020000 0.000000 0.000000 0.000000
0.000000 0.000000 0.000000 0.000000 0.000000 0.000000 0.000000 0.000000 0.000000 0.000000 0.000000 0.000000 0.000000 0.000000 1.000000 0.000000 0.000000 0.000000 0.000000 0.000000
0.000000 0.000000 0.000000 0.000000 0.020000 0.000000 0.000000 0.040000 0.000000 0.640000 0.260000 0.040000 0.000000 0.000000 0.000000 0.000000 0.000000 0.000000 0.000000 0.000000
0.000000 0.000000 0.000000 0.000000 0.240000 0.000000 0.600000 0.020000 0.000000 0.100000 0.000000 0.000000 0.000000 0.000000 0.000000 0.000000 0.000000 0.000000 0.000000 0.040000
0.000000 0.000000 0.000000 0.000000 0.960000 0.000000 0.000000 0.000000 0.000000 0.000000 0.000000 0.000000 0.000000 0.000000 0.000000 0.000000 0.000000 0.000000 0.000000 0.040000
0.000000 0.000000 0.000000 0.000000 0.000000 0.000000 0.960000 0.000000 0.000000 0.020000 0.000000 0.000000 0.000000 0.000000 0.000000 0.020000 0.000000 0.000000 0.000000 0.000000
0.000000 0.000000 1.000000 0.000000 0.000000 0.000000 0.000000 0.000000 0.000000 0.000000 0.000000 0.000000 0.000000 0.000000 0.000000 0.000000 0.000000 0.000000 0.000000 0.000000
0.000000 1.000000 0.000000 0.000000 0.000000 0.000000 0.000000 0.000000 0.000000 0.000000 0.000000 0.000000 0.000000 0.000000 0.000000 0.000000 0.000000 0.000000 0.000000 0.000000
0.020000 0.000000 0.000000 0.000000 0.920000 0.020000 0.000000 0.000000 0.000000 0.000000 0.020000 0.000000 0.000000 0.000000 0.000000 0.000000 0.000000 0.020000 0.000000 0.000000
0.000000 0.000000 0.000000 0.000000 0.000000 0.000000 0.000000 0.100000 0.000000 0.020000 0.000000 0.000000 0.020000 0.000000 0.000000 0.020000 0.000000 0.840000 0.000000 0.000000
0.000000 0.000000 0.020000 0.120000 0.000000 0.000000 0.000000 0.000000 0.040000 0.020000 0.000000 0.360000 0.000000 0.180000 0.220000 0.000000 0.040000 0.000000 0.000000 0.000000
0.000000 0.000000 0.000000 0.000000 0.000000 0.960000 0.000000 0.000000 0.000000 0.000000 0.000000 0.000000 0.000000 0.000000 0.000000 0.040000 0.000000 0.000000 0.000000 0.000000
0.000000 1.000000 0.000000 0.000000 0.000000 0.000000 0.000000 0.000000 0.000000 0.000000 0.000000 0.000000 0.000000 0.000000 0.000000 0.000000 0.000000 0.000000 0.000000 0.000000
0.000000 0.000000 0.960000 0.040000 0.000000 0.000000 0.000000 0.000000 0.000000 0.000000 0.000000 0.000000 0.000000 0.000000 0.000000 0.000000 0.000000 0.000000 0.000000 0.000000
0.620000 0.000000 0.000000 0.000000 0.000000 0.380000 0.000000 0.000000 0.000000 0.000000 0.000000 0.000000 0.000000 0.000000 0.000000 0.000000 0.000000 0.000000 0.000000 0.000000
0.000000 0.000000 0.000000 0.000000 0.000000 0.000000 0.000000 0.000000 0.000000 0.000000 0.000000 0.000000 0.000000 0.000000 0.000000 1.000000 0.000000 0.000000 0.000000 0.000000
0.000000 0.000000 0.000000 0.000000 0.000000 0.000000 0.000000 0.480000 0.000000 0.120000 0.000000 0.000000 0.000000 0.000000 0.000000 0.000000 0.000000 0.400000 0.000000 0.000000
0.000000 0.000000 0.000000 0.000000 0.000000 0.000000 0.000000 0.000000 0.000000 0.940000 0.060000 0.000000 0.000000 0.000000 0.000000 0.000000 0.000000 0.000000 0.000000 0.000000
0.000000 0.000000 0.000000 0.000000 0.000000 0.000000 0.000000 0.280000 0.000000 0.680000 0.000000 0.000000 0.000000 0.000000 0.000000 0.000000 0.000000 0.040000 0.000000 0.000000
0.080000 0.000000 0.560000 0.060000 0.000000 0.000000 0.000000 0.000000 0.120000 0.000000 0.000000 0.080000 0.000000 0.020000 0.000000 0.040000 0.000000 0.040000 0.000000 0.000000
0.080000 0.000000 0.120000 0.040000 0.000000 0.120000 0.060000 0.000000 0.000000 0.020000 0.000000 0.140000 0.020000 0.000000 0.000000 0.340000 0.040000 0.000000 0.000000 0.020000
0.060000 0.000000 0.040000 0.040000 0.000000 0.000000 0.000000 0.000000 0.040000 0.000000 0.000000 0.020000 0.100000 0.000000 0.000000 0.220000 0.480000 0.000000 0.000000 0.000000
--------------------------------------------------------------------------------
--------------------------------------------------------------------------------
	Motif KSCPNAEKIVRNVVKQAVKSDPRLAASLLRLHFHDCFVNGCDASILLDST MEME-2 regular expression
--------------------------------------------------------------------------------
K[ST]CPN[AV]EKI[VI]RX[VT][VI]XQAVK[RS]DP[RT][ILM]AA[SA]L[LI]R[LM][HF]FHDCFV[NR]GCD[AG]S[IV]L[LI]DS[TS]
--------------------------------------------------------------------------------
Time 321.74 secs.
********************************************************************************
********************************************************************************
MOTIF LEAACPGVVSCADILALAARDAVVLAGGPSWPVPLGRRDGR MEME-3	width = 41 sites = 50 llr = 3930 E-value = 6.1e-1150
********************************************************************************
--------------------------------------------------------------------------------
	Motif LEAACPGVVSCADILALAARDAVVLAGGPSWPVPLGRRDGR MEME-3 Description
--------------------------------------------------------------------------------
Simplified A 1:24:::::::8:::6185::4:214:::::1:1:::::::
pos.-specific C ::::a:::::a::::::::::::::::::::::::::::::
probability D ::::::::::::a:::::::7::::::::::1::::::a::
matrix E :9:1:::::::::::::::11:::::1::::2:2:::::::
F :::::::::::::::::::::::1::::::1::::::::::
G ::::::5:::::::::::::::::::8a:1:::::a:::7:
H :::::::::::::::::::::::::::::::::::::::::
I 1::::::1:::::9111:::::1::1::::::1::::::::
K ::21:::1:::::::::::::::::::::::1:1:::2::1
L 6:1:::::::::::7:6::::11:61:::::::16::1::4
M ::::::::::::::::1:::::::1::::::::::::::::
N ::11::2::::::::::::::::::::::::1:::::::::
P ::1::9::::::::::::::::::::::9::3:4:::::::
Q :::1::1::::::::::::::::::::::::1:::::::::
R 1::::11::::::::::::9:::::::::1:1::::a7::4
S ::11::1::a:2::::::1::3:1:::::4:1:::::::3:
T :::1:::3:::::::3::3:::::13::::::::2::::::
V 1::1:::4a::::11::1:::28411::::::8::::::::
W :::::::::::::::::::::::::::::15::::::::::
Y :::::::::::::::::::::::::::::23::::::::::
bits 7.8
7
6.3
5.5 * *
Relative 4.7 * * *
Entropy 3.9 * ** * * * ** * ** *
(113.4 bits) 3.1 * ** ****** * * *** * * ****
2.3 * ** ************* * *** * * ******
1.6 ** ******************* *****************
0.8 *****************************************
0.0 -----------------------------------------
Multilevel LEAACPGVVSCADILALAARDAVVLAGGPSWPVPLGRRDGR
consensus T S T T S A T YE ET SL
sequence
--------------------------------------------------------------------------------
--------------------------------------------------------------------------------
	Motif LEAACPGVVSCADILALAARDAVVLAGGPSWPVPLGRRDGR MEME-3 sites sorted by position p-value
--------------------------------------------------------------------------------
Sequence name Start P-value Site
------------- ----- --------- -----------------------------------------
Bra024268.1 118 2.21e-41 FNVIEEAKTQ LEIACPLTVSCADILALAARDFVVLTGGPWWPVPLGRLDGR VSLASNVDLP
Bra024269.1 116 1.27e-40 FEVIDNAKTQ LEAACPGVVSCADILALAARDSVVLTRGTSWPVPTGRRDGR VSLASNANNL
Bra014200.1 152 1.73e-39 FDVIEDIKTD IESACPITVSCADIVALAAREAVVLTGGPYWPVPLGRRDSL TASEQAANTN
Bra028436.1 106 4.38e-39 FEVIDDAKTQ LEAACPGVVSCADILTLAARDSIALTKGQSWQVPTGRRDGR ISLATNVNNL
Bra017761.1 115 5.94e-39 FDVVDQIKAQ LEKECPGTVSCADALTLAARDSSVLTGGPSWMVPLGRRDSR SASLSGSNNN
Bra023639.1 102 5.94e-39 FDLIDRIKAQ LEAACPSTVSCADIITLATRDSVALAGGPSYSIPTGRRDGL VSNNVDVALP
Bra015402.1 109 1.69e-38 YEVVDAAKSA LEKKCPGVVSCADVLALVARDAVLVINGPWWPVPLGRRDGR ISRKSEVNLP
Bra030607.1 120 1.95e-38 WEVVDAVKSV LERKCPGVVSCADVLALVARDAVAVIRGPWWPVPLGRRDGR ISRLSEANLP
Bra011681.1 115 6.19e-38 FEVVDQIKAQ LEKQCPGTVSGADILTLAARDSSVLTGGPSWMVPLGRRDSR SASLSGSNNN
Bra019132.1 106 6.19e-38 YEIIDEAKRQ LEAACPRTVSCADIVTLATRDSVALAGGPRFSVPTGRRDGL RSSPNDVNLP
Bra008775.1 49 7.13e-38 FDTVAKAKLA VEAQCPGLVSCADILALAARDVVVLAGGPGFKVELGRRDGL VSHASSVDGK
Bra000228.1 108 1.65e-37 FEVIDDAKAQ LELECPGVVSCADILALAARDAVDLSSGPSWRVPTGRKDGR ISLASEASNL
Bra023449.1 94 2.17e-37 FDTVNKAKLA VEAQCPGRVSCADIMALAARDVVVLAGGPGFKVELGRRDGL VSNASRVDRK
Bra002271.1 61 2.49e-37 FEVVDTIKAA VESACPGVVSCADILTLAARESVYMTGGPMWRVALGRKDGL VANQSSANNL
Bra036445.1 104 2.49e-37 FELIDEIKAE LEAQCPSNVSCADIMALATRDSVALAGGPSYNIPTGRRDGL RTNANGVFNL
Bra013943.1 106 2.49e-37 YEIIDEAKRL LEAACPRTVSCSDIVTLATRDSVALAGGPRFSVPTGRRDGL RSSPNDVNLP
Bra038526.1 92 4.29e-37 FEVVDDIKEA LEKACPSTVSCADIVIMASRDAVALTGGPDWEVKLGRKDSL TASQKDSDDI
Bra024267.1 119 4.29e-37 FEAIEEAKAR LEVACPRTVSCADILTLAAREAVVLTGGQGWRVPLGRLDGR ISQASDVILP
Bra009105.1 116 4.91e-37 FNVIDNIKTA VEAACPGVVSCADILAIAARDSVVLLGGPNWNVKVGRRDAR TASQAAANNN
Bra021488.1 109 9.56e-37 FGIIDDSKAA LEKVCPGIVSCSDILALIARDAMVALEGPSWEVETGRRDGR GSNINEVNLP
Bra005346.1 112 1.42e-36 FEVIDYIKYL LEEACPLTVSCSDIITMAARDSVFLRGGPWWEVYLGRRDSI KASFAGANQY
Bra039137.1 109 1.42e-36 FGIIDDSKAA LEKVCPGIVSCSDILALVARDAMVALEGPTWEVETGRRDGR VSNINEVNLP
Bra030241.1 108 1.42e-36 FEVVDYIKEA LEKACPATVSCADIVIMASRDAVALTGGPDWEVKLGRKDSL TASQKDSDDI
Bra030606.1 128 1.62e-36 VVDAVKSSLE RTWGCRGVVSCADILALVARDAVAVIGGPWWPVPLGRRDGR ISKLSEVNLP
Bra002270.1 113 2.72e-36 FEVIDDIKTA LENVCPGVVSCADILAIAAEISVSLAGGPSWDVLLGRRDGR TANRGEAVTA
Bra002269.1 113 2.72e-36 FEVIDDIKTA LENVCPGVVSCADILAIAAEISVSLAGGPSWDVLLGRRDGR TANRGDAVAA
Bra024102.1 111 3.09e-36 TVVKAKQAVD RDPKCRNKVSCADILALATREVVVLTGGPSYPVELGRRDGR LSTKASVQNN
Bra008715.1 115 7.52e-36 FEIIDNVKEA VEKECPGVVSCSDVLALVARDAVVALNGPSWGVETGRRDGR VTNINEARAN
Bra036842.1 121 1.24e-35 FEVIDDIKSA LEDECPQTVSCADILALVARDTTVITGGPSWEVYLGRRDAR EACLIASNNN
Bra011170.1 110 2.30e-35 TVVKAKQAVD RDPNCRKKVSCADILALATREVVVLTGGPSYPVELGRRDGR LSTKASVQHS
Bra034561.1 108 2.94e-35 YEIIYDTKQE IENTCPGVVSCADILAMAARDAVFWAGGPFYQIPKGRFDGK RSKIEDTKNL
Bra024972.1 47 3.32e-35 TCPDFNKITA LELSCPGVVSCADILAQATRDLVTMVGGPYFDVKLGRKDGH ESKAHKVRGN
Bra011438.1 100 1.24e-34 YEIVDDAKAE IENTCPGVVSCADIIAMAARDAVFWAGGPYYQIANGRFDGK RSKIEDTRNL
Bra031832.1 121 1.57e-34 VVIKAKKALD AIPSCRNKVSCADILALATRDVVVAAEGPSYPVELGRRDGL ESTAASVHGN
Bra009728.1 119 1.57e-34 FVIIDKIKQV LESRCPGVVSCADILNLATRDAVHMAGAPSYPVFTGRRDGG ALTADAVDLP
Bra017830.1 37 1.77e-34 TVIKAKQALD AVANCRNKVSCADILTIATRDVVNLAGGPRYEVELGRRDGL SSTADSVEGK
Bra009221.1 118 3.55e-34 FNVVDDIKTA LENACPGIVSCSDILALASEASVSLAGGPTWAVLLGRRDGL TANLSGANTG
Bra040175.1 112 7.92e-34 FDIVTRIKAA LEESCPGVVSCADILAQSTHDVVTMIGGPSYEVKLGRKDGF ESKAHKVREN
Bra033040.1 110 1.39e-33 FDAVVRAKTA LELACPNTVSCSDIISAATRDLLVTVGGPYYPVFLGRRDSR TSKASLLASL
Bra039059.1 117 1.56e-33 FDVIVRAKTA LELACPQTVSCSDIISVATRDLLVTVGGPYYPVHLGRRDSR TSKASLLADL
Bra000059.1 116 1.95e-33 FNVIDRMKTQ IERACPRTVSCADILTIASQVSVLLSGGPSWSVPLGRRDGL QAFFVGANTL
Bra005456.1 102 2.44e-33 FESIIKAKAL VESHCPSRVSCSDILAIAARDFIHLAGGPYYQVKKGRWDGK RSTATNVPPN
Bra011771.1 112 3.39e-33 TVIKAKQALD AVANCRNKVSCADILTIATRDVVNLAGGPRYEVELGRLDGL SSTAASVEGK
Bra025604.1 110 6.55e-33 FDVVIRAKTA LELACPNTVSCSDILAAAVRDLLVTVGGPYYEISLGRRDSR VSRSSLLLAD
Bra037849.1 115 6.55e-33 VVIKAKKAID AIPSCRNKVSCADILALATRDVIVAAKGPSYKVELGRRDGL VSTAASVNGN
Bra022195.1 122 3.88e-31 RELIGSIKTS LEVECPQQVSCSDLIILAAREAVALTGGPLIAVPLGRKDSL STPSKHVADS
Bra007831.1 116 9.53e-31 FDVIESAKNV LEIFCPGIVSCADVLVLAARDAVEALGGPVVAIPTGRRDGT VSAAENVRPN
Bra024033.1 142 2.10e-30 LDVIAFIKSE LENTCPGVVSCADTLALATKEAVSLAGGPKYSLRIGRKDSL VTFKDIAQRE
Bra023149.1 130 5.52e-30 FELIEDIKSE IEKSCPGLVSCADILTAASRSATYQLGGPYWPNAYGRRDST NSYARDVEKV
Bra024635.1 109 1.08e-29 FDLITRIKTA LELKCPNVVSCSDILVGATRSLVKMVGGPRINVKYGRKDSL DSDMNRVEGK
--------------------------------------------------------------------------------
--------------------------------------------------------------------------------
	Motif LEAACPGVVSCADILALAARDAVVLAGGPSWPVPLGRRDGR MEME-3 block diagrams
--------------------------------------------------------------------------------
SEQUENCE NAME POSITION P-VALUE MOTIF DIAGRAM
------------- ---------------- -------------
Bra024268.1 2.2e-41 117_[3]_175
Bra024269.1 1.3e-40 115_[3]_172
Bra014200.1 1.7e-39 151_[3]_177
Bra028436.1 4.4e-39 105_[3]_172
Bra017761.1 5.9e-39 114_[3]_176
Bra023639.1 5.9e-39 101_[3]_168
Bra015402.1 1.7e-38 108_[3]_172
Bra030607.1 2e-38 119_[3]_172
Bra011681.1 6.2e-38 114_[3]_176
Bra019132.1 6.2e-38 105_[3]_166
Bra008775.1 7.1e-38 48_[3]_175
Bra000228.1 1.6e-37 107_[3]_179
Bra023449.1 2.2e-37 93_[3]_234
Bra002271.1 2.5e-37 60_[3]_179
Bra036445.1 2.5e-37 103_[3]_173
Bra013943.1 2.5e-37 105_[3]_166
Bra038526.1 4.3e-37 91_[3]_182
Bra024267.1 4.3e-37 118_[3]_175
Bra009105.1 4.9e-37 115_[3]_121
Bra021488.1 9.6e-37 108_[3]_170
Bra005346.1 1.4e-36 111_[3]_181
Bra039137.1 1.4e-36 108_[3]_170
Bra030241.1 1.4e-36 107_[3]_181
Bra030606.1 1.6e-36 127_[3]_172
Bra002270.1 2.7e-36 112_[3]_177
Bra002269.1 2.7e-36 112_[3]_177
Bra024102.1 3.1e-36 110_[3]_174
Bra008715.1 7.5e-36 114_[3]_258
Bra036842.1 1.2e-35 120_[3]_176
Bra011170.1 2.3e-35 109_[3]_174
Bra034561.1 2.9e-35 107_[3]_164
Bra024972.1 3.3e-35 46_[3]_175
Bra011438.1 1.2e-34 99_[3]_164
Bra031832.1 1.6e-34 120_[3]_174
Bra009728.1 1.6e-34 118_[3]_182
Bra017830.1 1.8e-34 36_[3]_174
Bra009221.1 3.6e-34 117_[3]_200
Bra040175.1 7.9e-34 111_[3]_195
Bra033040.1 1.4e-33 109_[3]_169
Bra039059.1 1.6e-33 116_[3]_169
Bra000059.1 1.9e-33 115_[3]_192
Bra005456.1 2.4e-33 101_[3]_176
Bra011771.1 3.4e-33 111_[3]_174
Bra025604.1 6.6e-33 109_[3]_171
Bra037849.1 6.6e-33 114_[3]_174
Bra022195.1 3.9e-31 121_[3]_176
Bra007831.1 9.5e-31 115_[3]_177
Bra024033.1 2.1e-30 141_[3]_212
Bra023149.1 5.5e-30 129_[3]_177
Bra024635.1 1.1e-29 108_[3]_182
--------------------------------------------------------------------------------
--------------------------------------------------------------------------------
	Motif LEAACPGVVSCADILALAARDAVVLAGGPSWPVPLGRRDGR MEME-3 in BLOCKS format
--------------------------------------------------------------------------------
BL MOTIF LEAACPGVVSCADILALAARDAVVLAGGPSWPVPLGRRDGR width=41 seqs=50
Bra024268.1 ( 118) LEIACPLTVSCADILALAARDFVVLTGGPWWPVPLGRLDGR 1
Bra024269.1 ( 116) LEAACPGVVSCADILALAARDSVVLTRGTSWPVPTGRRDGR 1
Bra014200.1 ( 152) IESACPITVSCADIVALAAREAVVLTGGPYWPVPLGRRDSL 1
Bra028436.1 ( 106) LEAACPGVVSCADILTLAARDSIALTKGQSWQVPTGRRDGR 1
Bra017761.1 ( 115) LEKECPGTVSCADALTLAARDSSVLTGGPSWMVPLGRRDSR 1
Bra023639.1 ( 102) LEAACPSTVSCADIITLATRDSVALAGGPSYSIPTGRRDGL 1
Bra015402.1 ( 109) LEKKCPGVVSCADVLALVARDAVLVINGPWWPVPLGRRDGR 1
Bra030607.1 ( 120) LERKCPGVVSCADVLALVARDAVAVIRGPWWPVPLGRRDGR 1
Bra011681.1 ( 115) LEKQCPGTVSGADILTLAARDSSVLTGGPSWMVPLGRRDSR 1
Bra019132.1 ( 106) LEAACPRTVSCADIVTLATRDSVALAGGPRFSVPTGRRDGL 1
Bra008775.1 ( 49) VEAQCPGLVSCADILALAARDVVVLAGGPGFKVELGRRDGL 1
Bra000228.1 ( 108) LELECPGVVSCADILALAARDAVDLSSGPSWRVPTGRKDGR 1
Bra023449.1 ( 94) VEAQCPGRVSCADIMALAARDVVVLAGGPGFKVELGRRDGL 1
Bra002271.1 ( 61) VESACPGVVSCADILTLAARESVYMTGGPMWRVALGRKDGL 1
Bra036445.1 ( 104) LEAQCPSNVSCADIMALATRDSVALAGGPSYNIPTGRRDGL 1
Bra013943.1 ( 106) LEAACPRTVSCSDIVTLATRDSVALAGGPRFSVPTGRRDGL 1
Bra038526.1 ( 92) LEKACPSTVSCADIVIMASRDAVALTGGPDWEVKLGRKDSL 1
Bra024267.1 ( 119) LEVACPRTVSCADILTLAAREAVVLTGGQGWRVPLGRLDGR 1
Bra009105.1 ( 116) VEAACPGVVSCADILAIAARDSVVLLGGPNWNVKVGRRDAR 1
Bra021488.1 ( 109) LEKVCPGIVSCSDILALIARDAMVALEGPSWEVETGRRDGR 1
Bra005346.1 ( 112) LEEACPLTVSCSDIITMAARDSVFLRGGPWWEVYLGRRDSI 1
Bra039137.1 ( 109) LEKVCPGIVSCSDILALVARDAMVALEGPTWEVETGRRDGR 1
Bra030241.1 ( 108) LEKACPATVSCADIVIMASRDAVALTGGPDWEVKLGRKDSL 1
Bra030606.1 ( 128) RTWGCRGVVSCADILALVARDAVAVIGGPWWPVPLGRRDGR 1
Bra002270.1 ( 113) LENVCPGVVSCADILAIAAEISVSLAGGPSWDVLLGRRDGR 1
Bra002269.1 ( 113) LENVCPGVVSCADILAIAAEISVSLAGGPSWDVLLGRRDGR 1
Bra024102.1 ( 111) RDPKCRNKVSCADILALATREVVVLTGGPSYPVELGRRDGR 1
Bra008715.1 ( 115) VEKECPGVVSCSDVLALVARDAVVALNGPSWGVETGRRDGR 1
Bra036842.1 ( 121) LEDECPQTVSCADILALVARDTTVITGGPSWEVYLGRRDAR 1
Bra011170.1 ( 110) RDPNCRKKVSCADILALATREVVVLTGGPSYPVELGRRDGR 1
Bra034561.1 ( 108) IENTCPGVVSCADILAMAARDAVFWAGGPFYQIPKGRFDGK 1
Bra024972.1 ( 47) LELSCPGVVSCADILAQATRDLVTMVGGPYFDVKLGRKDGH 1
Bra011438.1 ( 100) IENTCPGVVSCADIIAMAARDAVFWAGGPYYQIANGRFDGK 1
Bra031832.1 ( 121) AIPSCRNKVSCADILALATRDVVVAAEGPSYPVELGRRDGL 1
Bra009728.1 ( 119) LESRCPGVVSCADILNLATRDAVHMAGAPSYPVFTGRRDGG 1
Bra017830.1 ( 37) AVANCRNKVSCADILTIATRDVVNLAGGPRYEVELGRRDGL 1
Bra009221.1 ( 118) LENACPGIVSCSDILALASEASVSLAGGPTWAVLLGRRDGL 1
Bra040175.1 ( 112) LEESCPGVVSCADILAQSTHDVVTMIGGPSYEVKLGRKDGF 1
Bra033040.1 ( 110) LELACPNTVSCSDIISAATRDLLVTVGGPYYPVFLGRRDSR 1
Bra039059.1 ( 117) LELACPQTVSCSDIISVATRDLLVTVGGPYYPVHLGRRDSR 1
Bra000059.1 ( 116) IERACPRTVSCADILTIASQVSVLLSGGPSWSVPLGRRDGL 1
Bra005456.1 ( 102) VESHCPSRVSCSDILAIAARDFIHLAGGPYYQVKKGRWDGK 1
Bra011771.1 ( 112) AVANCRNKVSCADILTIATRDVVNLAGGPRYEVELGRLDGL 1
Bra025604.1 ( 110) LELACPNTVSCSDILAAAVRDLLVTVGGPYYEISLGRRDSR 1
Bra037849.1 ( 115) AIPSCRNKVSCADILALATRDVIVAAKGPSYKVELGRRDGL 1
Bra022195.1 ( 122) LEVECPQQVSCSDLIILAAREAVALTGGPLIAVPLGRKDSL 1
Bra007831.1 ( 116) LEIFCPGIVSCADVLVLAARDAVEALGGPVVAIPTGRRDGT 1
Bra024033.1 ( 142) LENTCPGVVSCADTLALATKEAVSLAGGPKYSLRIGRKDSL 1
Bra023149.1 ( 130) IEKSCPGLVSCADILTAASRSATYQLGGPYWPNAYGRRDST 1
Bra024635.1 ( 109) LELKCPNVVSCSDILVGATRSLVKMVGGPRINVKYGRKDSL 1
//
--------------------------------------------------------------------------------
--------------------------------------------------------------------------------
	Motif LEAACPGVVSCADILALAARDAVVLAGGPSWPVPLGRRDGR MEME-3 position-specific scoring matrix
--------------------------------------------------------------------------------
log-odds matrix: alength= 20 w= 41 n= 34403 bayes= 9.91495 E= 6.1e-1150
-17 -469 -691 -525 -385 -632 -478 102 -541 272 -201 -609 -569 -467 -23 -573 -436 68 -322 -414
-489 -657 -131 456 -684 -549 -425 -155 -457 -635 -541 -471 -582 -308 -575 -562 -261 -211 -456 -556
131 -474 -133 35 -460 -373 -189 -36 182 17 -294 103 70 -147 -48 -12 -257 -86 202 -299
198 -475 -293 138 -145 -165 36 -387 81 -404 -295 14 -359 138 -119 16 13 4 -269 -299
-476 526 -632 -509 -595 -615 -494 -482 -590 -571 -460 -599 -599 -543 -586 -579 -472 -567 -454 -554
-662 -769 -768 -691 -829 -721 -656 -797 -701 -792 -769 -785 427 -670 115 -721 -706 -793 -609 -741
-165 -507 -343 -196 -513 278 -234 -130 -62 -133 -344 139 -412 96 33 -19 -312 -428 -305 -349
-369 -415 -562 -375 -407 -503 -326 75 129 -106 -250 -141 -498 -48 -52 -434 242 223 -262 -333
-797 -769 -885 -872 -838 -790 -767 -531 -890 -735 -727 -905 -803 -847 -896 -898 -784 379 -651 -782
-769 -804 -880 -881 -923 -758 -757 -971 -899 -935 -934 -896 -791 -840 -890 350 -823 -935 -651 -812
-419 523 -582 -454 -541 -361 -444 -425 -537 -516 -403 -545 -552 -490 -533 -523 -415 -510 -408 -504
320 -463 -761 -671 -743 -460 -633 -683 -728 -724 -609 -645 -576 -608 -717 143 -445 -560 -549 -677
-884 -840 395 -689 -910 -777 -718 -939 -864 -920 -917 -751 -797 -813 -870 -892 -866 -951 -638 -789
-226 -433 -536 -440 -392 -556 -458 402 -440 -117 -155 -490 -535 -441 -526 -486 -172 58 -302 -350
-561 -546 -772 -603 -382 -731 -550 126 -623 292 93 -704 -632 -520 -632 -683 -528 42 -348 -464
283 -385 -652 -532 -571 -412 -515 25 -570 -518 -423 -150 -546 -511 -599 -99 213 -80 -407 -517
-88 -411 -586 -413 -292 -227 -370 114 -431 280 184 -515 -459 -8 -445 -486 -374 -150 -225 -327
331 -281 -542 -411 -490 -322 -430 -131 -454 -435 -338 -497 -525 -430 -498 -155 -329 51 -315 -445
271 -453 -756 -663 -735 -450 -627 -670 -720 -715 -598 -635 -566 -598 -708 21 258 -178 -543 -670
-410 -373 -512 -60 -546 -459 -46 -426 -91 -454 -397 -391 -393 -114 383 -443 -412 -526 -180 -393
-258 -465 365 103 -502 -424 -256 -140 -394 -493 -407 -161 -486 -331 -452 -205 -412 -269 -281 -361
209 -394 -645 -492 -40 -471 -422 -264 -506 7 -273 -530 -515 -448 -538 169 -124 130 -292 -368
-182 -273 -445 -322 -375 -450 -297 45 -370 -115 16 -438 -377 -357 -389 -183 -80 338 -269 -389
119 -439 -141 -38 5 -389 119 -315 -66 -119 -265 -38 -376 -173 -288 -14 -36 230 -255 76
24 -386 -586 -416 -308 -519 -360 -72 -430 264 197 -497 -464 -81 -453 -455 -15 -30 281 -309
204 -355 -588 -424 -343 -480 -348 82 -431 34 -194 -473 -477 -382 -160 -110 222 55 -216 -288
-316 -480 -383 5 -578 355 -362 -518 -79 -592 -453 -89 -475 -412 -116 -224 -444 -507 -302 -436
-191 -505 -430 -404 -615 374 -406 -557 -428 -628 -492 -394 -510 -455 -474 -410 -474 -540 -341 -476
-317 -502 -472 -357 -545 -471 -370 -463 -378 -476 -436 -479 434 16 -452 -385 -149 -458 -399 -486
-277 -456 -61 -149 -142 -31 -198 -347 -60 -200 -8 -111 -367 -159 62 194 -35 -162 430 267
-744 -656 -801 -714 99 -764 -339 -29 -698 -567 -541 -650 -735 -584 -688 -714 -684 -183 678 395
-35 -476 -10 227 -462 -165 -189 -388 48 -405 79 14 235 138 -1 16 -257 -382 -270 -300
-371 -430 -642 -520 -518 -640 -509 132 -567 -201 -353 -161 -573 -557 -597 -600 -390 350 -462 -547
-37 -477 -306 237 -55 -382 33 -391 147 -77 -305 -278 295 -160 -124 -162 -267 -387 -279 73
-352 -375 -588 -421 -325 -504 -356 -68 -45 265 -154 -158 -473 -370 -457 -439 187 -123 -220 69
-734 -797 -774 -762 -886 382 -699 -897 -782 -900 -849 -764 -764 -775 -804 -785 -808 -891 -606 -763
-809 -752 -831 -797 -873 -752 -604 -840 -597 -839 -814 -792 -736 -662 401 -833 -797 -907 -554 -743
-510 -553 -616 -405 -58 -565 -295 -526 181 -85 -456 -465 -541 -268 349 -526 -474 -567 200 -351
-884 -840 395 -689 -910 -777 -718 -939 -864 -920 -917 -751 -797 -813 -870 -892 -866 -951 -638 -789
-78 -456 -706 -635 -730 328 -606 -670 -687 -714 -595 -608 -564 -589 -688 153 -437 -552 -529 -656
-428 -495 -582 -371 -139 -180 27 -108 52 189 -327 -455 -535 -276 275 -475 -45 -375 -321 -393
--------------------------------------------------------------------------------
--------------------------------------------------------------------------------
	Motif LEAACPGVVSCADILALAARDAVVLAGGPSWPVPLGRRDGR MEME-3 position-specific probability matrix
--------------------------------------------------------------------------------
letter-probability matrix: alength= 20 w= 41 nsites= 50 E= 6.1e-1150
0.080000 0.000000 0.000000 0.000000 0.000000 0.000000 0.000000 0.100000 0.000000 0.640000 0.000000 0.000000 0.000000 0.000000 0.060000 0.000000 0.000000 0.120000 0.000000 0.000000
0.000000 0.000000 0.040000 0.860000 0.000000 0.000000 0.000000 0.040000 0.000000 0.000000 0.000000 0.000000 0.000000 0.000000 0.000000 0.000000 0.020000 0.040000 0.000000 0.000000
0.220000 0.000000 0.020000 0.040000 0.000000 0.000000 0.000000 0.040000 0.180000 0.120000 0.000000 0.120000 0.080000 0.000000 0.040000 0.080000 0.000000 0.040000 0.020000 0.000000
0.360000 0.000000 0.000000 0.100000 0.020000 0.020000 0.020000 0.000000 0.080000 0.000000 0.000000 0.060000 0.000000 0.080000 0.020000 0.100000 0.060000 0.080000 0.000000 0.000000
0.000000 1.000000 0.000000 0.000000 0.000000 0.000000 0.000000 0.000000 0.000000 0.000000 0.000000 0.000000 0.000000 0.000000 0.000000 0.000000 0.000000 0.000000 0.000000 0.000000
0.000000 0.000000 0.000000 0.000000 0.000000 0.000000 0.000000 0.000000 0.000000 0.000000 0.000000 0.000000 0.860000 0.000000 0.140000 0.000000 0.000000 0.000000 0.000000 0.000000
0.020000 0.000000 0.000000 0.000000 0.000000 0.520000 0.000000 0.020000 0.020000 0.040000 0.000000 0.160000 0.000000 0.060000 0.080000 0.080000 0.000000 0.000000 0.000000 0.000000
0.000000 0.000000 0.000000 0.000000 0.000000 0.000000 0.000000 0.080000 0.120000 0.040000 0.000000 0.020000 0.000000 0.020000 0.040000 0.000000 0.320000 0.360000 0.000000 0.000000
0.000000 0.000000 0.000000 0.000000 0.000000 0.000000 0.000000 0.000000 0.000000 0.000000 0.000000 0.000000 0.000000 0.000000 0.000000 0.000000 0.000000 1.000000 0.000000 0.000000
0.000000 0.000000 0.000000 0.000000 0.000000 0.000000 0.000000 0.000000 0.000000 0.000000 0.000000 0.000000 0.000000 0.000000 0.000000 1.000000 0.000000 0.000000 0.000000 0.000000
0.000000 0.980000 0.000000 0.000000 0.000000 0.020000 0.000000 0.000000 0.000000 0.000000 0.000000 0.000000 0.000000 0.000000 0.000000 0.000000 0.000000 0.000000 0.000000 0.000000
0.760000 0.000000 0.000000 0.000000 0.000000 0.000000 0.000000 0.000000 0.000000 0.000000 0.000000 0.000000 0.000000 0.000000 0.000000 0.240000 0.000000 0.000000 0.000000 0.000000
0.000000 0.000000 1.000000 0.000000 0.000000 0.000000 0.000000 0.000000 0.000000 0.000000 0.000000 0.000000 0.000000 0.000000 0.000000 0.000000 0.000000 0.000000 0.000000 0.000000
0.020000 0.000000 0.000000 0.000000 0.000000 0.000000 0.000000 0.860000 0.000000 0.020000 0.000000 0.000000 0.000000 0.000000 0.000000 0.000000 0.020000 0.080000 0.000000 0.000000
0.000000 0.000000 0.000000 0.000000 0.000000 0.000000 0.000000 0.120000 0.000000 0.740000 0.040000 0.000000 0.000000 0.000000 0.000000 0.000000 0.000000 0.100000 0.000000 0.000000
0.580000 0.000000 0.000000 0.000000 0.000000 0.000000 0.000000 0.060000 0.000000 0.000000 0.000000 0.020000 0.000000 0.000000 0.000000 0.040000 0.260000 0.040000 0.000000 0.000000
0.060000 0.000000 0.000000 0.000000 0.000000 0.020000 0.000000 0.140000 0.000000 0.620000 0.100000 0.000000 0.000000 0.040000 0.000000 0.000000 0.000000 0.020000 0.000000 0.000000
0.840000 0.000000 0.000000 0.000000 0.000000 0.000000 0.000000 0.020000 0.000000 0.000000 0.000000 0.000000 0.000000 0.000000 0.000000 0.020000 0.000000 0.120000 0.000000 0.000000
0.540000 0.000000 0.000000 0.000000 0.000000 0.000000 0.000000 0.000000 0.000000 0.000000 0.000000 0.000000 0.000000 0.000000 0.000000 0.100000 0.340000 0.020000 0.000000 0.000000
0.000000 0.000000 0.000000 0.060000 0.000000 0.000000 0.020000 0.000000 0.020000 0.000000 0.000000 0.000000 0.000000 0.020000 0.880000 0.000000 0.000000 0.000000 0.000000 0.000000
0.020000 0.000000 0.740000 0.140000 0.000000 0.000000 0.000000 0.040000 0.000000 0.000000 0.000000 0.000000 0.000000 0.000000 0.000000 0.040000 0.000000 0.020000 0.000000 0.000000
0.360000 0.000000 0.000000 0.000000 0.040000 0.000000 0.000000 0.000000 0.000000 0.100000 0.000000 0.000000 0.000000 0.000000 0.000000 0.300000 0.020000 0.180000 0.000000 0.000000
0.000000 0.000000 0.000000 0.000000 0.000000 0.000000 0.000000 0.060000 0.000000 0.060000 0.040000 0.000000 0.000000 0.000000 0.000000 0.040000 0.040000 0.760000 0.000000 0.000000
0.200000 0.000000 0.020000 0.020000 0.060000 0.000000 0.040000 0.000000 0.020000 0.040000 0.000000 0.040000 0.000000 0.000000 0.000000 0.080000 0.040000 0.400000 0.000000 0.040000
0.120000 0.000000 0.000000 0.000000 0.000000 0.000000 0.000000 0.020000 0.000000 0.580000 0.100000 0.000000 0.000000 0.020000 0.000000 0.000000 0.060000 0.060000 0.040000 0.000000
0.360000 0.000000 0.000000 0.000000 0.000000 0.000000 0.000000 0.080000 0.000000 0.120000 0.000000 0.000000 0.000000 0.000000 0.020000 0.040000 0.280000 0.100000 0.000000 0.000000
0.000000 0.000000 0.000000 0.060000 0.000000 0.800000 0.000000 0.000000 0.040000 0.000000 0.000000 0.040000 0.000000 0.000000 0.040000 0.020000 0.000000 0.000000 0.000000 0.000000
0.020000 0.000000 0.000000 0.000000 0.000000 0.980000 0.000000 0.000000 0.000000 0.000000 0.000000 0.000000 0.000000 0.000000 0.000000 0.000000 0.000000 0.000000 0.000000 0.000000
0.000000 0.000000 0.000000 0.000000 0.000000 0.000000 0.000000 0.000000 0.000000 0.000000 0.000000 0.000000 0.940000 0.040000 0.000000 0.000000 0.020000 0.000000 0.000000 0.000000
0.000000 0.000000 0.040000 0.000000 0.020000 0.060000 0.000000 0.000000 0.020000 0.020000 0.020000 0.020000 0.000000 0.000000 0.100000 0.380000 0.040000 0.020000 0.100000 0.160000
0.000000 0.000000 0.000000 0.000000 0.100000 0.000000 0.000000 0.040000 0.000000 0.000000 0.000000 0.000000 0.000000 0.000000 0.000000 0.000000 0.000000 0.020000 0.500000 0.340000
0.060000 0.000000 0.060000 0.200000 0.000000 0.020000 0.000000 0.000000 0.060000 0.000000 0.040000 0.060000 0.260000 0.080000 0.060000 0.100000 0.000000 0.000000 0.000000 0.000000
0.000000 0.000000 0.000000 0.000000 0.000000 0.000000 0.000000 0.120000 0.000000 0.020000 0.000000 0.020000 0.000000 0.000000 0.000000 0.000000 0.000000 0.840000 0.000000 0.000000
0.060000 0.000000 0.000000 0.220000 0.040000 0.000000 0.020000 0.000000 0.140000 0.060000 0.000000 0.000000 0.380000 0.000000 0.020000 0.020000 0.000000 0.000000 0.000000 0.040000
0.000000 0.000000 0.000000 0.000000 0.000000 0.000000 0.000000 0.020000 0.040000 0.620000 0.000000 0.020000 0.000000 0.000000 0.000000 0.000000 0.240000 0.020000 0.000000 0.040000
0.000000 0.000000 0.000000 0.000000 0.000000 1.000000 0.000000 0.000000 0.000000 0.000000 0.000000 0.000000 0.000000 0.000000 0.000000 0.000000 0.000000 0.000000 0.000000 0.000000
0.000000 0.000000 0.000000 0.000000 0.000000 0.000000 0.000000 0.000000 0.000000 0.000000 0.000000 0.000000 0.000000 0.000000 1.000000 0.000000 0.000000 0.000000 0.000000 0.000000
0.000000 0.000000 0.000000 0.000000 0.040000 0.000000 0.000000 0.000000 0.180000 0.060000 0.000000 0.000000 0.000000 0.000000 0.700000 0.000000 0.000000 0.000000 0.020000 0.000000
0.000000 0.000000 1.000000 0.000000 0.000000 0.000000 0.000000 0.000000 0.000000 0.000000 0.000000 0.000000 0.000000 0.000000 0.000000 0.000000 0.000000 0.000000 0.000000 0.000000
0.040000 0.000000 0.000000 0.000000 0.000000 0.700000 0.000000 0.000000 0.000000 0.000000 0.000000 0.000000 0.000000 0.000000 0.000000 0.260000 0.000000 0.000000 0.000000 0.000000
0.000000 0.000000 0.000000 0.000000 0.020000 0.020000 0.020000 0.020000 0.060000 0.380000 0.000000 0.000000 0.000000 0.000000 0.440000 0.000000 0.040000 0.000000 0.000000 0.000000
--------------------------------------------------------------------------------
--------------------------------------------------------------------------------
	Motif LEAACPGVVSCADILALAARDAVVLAGGPSWPVPLGRRDGR MEME-3 regular expression
--------------------------------------------------------------------------------
LEAACPG[VT]VSC[AS]DIL[AT]LA[AT]RD[AS]V[VA]L[AT]GGPS[WY][PE]V[PE][LT]GRRD[GS][RL]
--------------------------------------------------------------------------------
Time 462.92 secs.
********************************************************************************
********************************************************************************
MOTIF NLPSPTSNVSQLJSKFASKGLNVKDLVALSGAHTIGFAHCSSFRNRLY MEME-4	width = 48 sites = 50 llr = 3803 E-value = 1.1e-1023
********************************************************************************
--------------------------------------------------------------------------------
	Motif NLPSPTSNVSQLJSKFASKGLNVKDLVALSGAHTIGFAHCSSFRNRLY MEME-4 Description
--------------------------------------------------------------------------------
Simplified A :::1::2:111::1::32:::::::::5:::7:::::4:::::11:::
pos.-specific C :::::::::::::::::::::::::::::::::::::::a::::::::
probability D 1:::::11:21::1:::1:::2::8:::::::::::::::::::2:::
matrix E :::::11::::::1::1::::::12::::::::::::::::1:11:::
F :::::21:1::::::a::::1:::::::::::::::3::::17::::1
G :::2:1:1::1:::::1::9::::::::::a2:::a:1::2:::1:::
H ::::::::::::::::::::::::::::::::a:::::5:::::1:::
I :3::::1:2::23:::::::::1:::1:::::::7:1:::::2:::3:
K 1:::::::::1:112:113::::2::::::::::::1:::11:1::::
L :6:::11:2::62:2:::::8:21:5:1a1::::2::::::1::::6:
M ::::::1:::::::1::::::::::4::::::::::::::::1:::::
N 5::::213:11::11::21::4::::::::::::::::1::1::2:::
P ::a18::1::::::::::::::::::::::::::::::::1:::::::
Q :::::::::12:111:1:2:::11::::::::::::2:1:::::1:::
R :::::1:::::::11::12::::2::::::::::::1:2:1::2:9::
S :::3:123:21::21:12:::3:::::1:8:2:1:::41:23:22:::
T :::::2:2:221121::::::121:::1:::::9:::1::11:1:::1
V :1::::::3:1:::::::1:::4:::82:1::::1:2:::1111::1:
W ::::::::::::::::::::::::::::::::::::::::::::::::
Y :::::::::::::::::::::::::::::::::::::::::::::::8
bits 7.8
7
6.3 *
5.5 * *
Relative 4.7 * * *
Entropy 3.9 * * * ** * * * *
(109.7 bits) 3.1 * * * * *** * * **** * * * *
2.3 ** * * *** *** ******** *** * ***
1.6 *** * ** ** * ***** **************** * ***
0.8 ************************************************
0.0 ------------------------------------------------
Multilevel NLPSPTSNVSQLISKFASKGLNVKDLVALSGAHTIGFAHCSSFRNRLY
consensus I SL IL L Q STR M V QS G I I
sequence I R D
--------------------------------------------------------------------------------
--------------------------------------------------------------------------------
	Motif NLPSPTSNVSQLJSKFASKGLNVKDLVALSGAHTIGFAHCSSFRNRLY MEME-4 sites sorted by position p-value
--------------------------------------------------------------------------------
Sequence name Start P-value Site
------------- ----- --------- ------------------------------------------------
Bra015404.1 159 3.18e-42 RISNASEALA NIPPPTSNFTNLQTLFANQGLDLKDLVLLSGAHTIGVSHCSSFTNRLY NFTGRGDQDP
Bra023862.1 162 2.21e-41 RISKLAEATN NIPGPTSNFTTLQQRFAKQGLNLKDLVLLSGAHTIGVSHCSSMSERLY NFSTTVKQDP
Bra028285.1 159 8.02e-41 GRMSRANETI NLPGPTFNVSQLIQSFAARGLSVKDMVTLSGGHTIGFSHCSSFEARLH NFSKFHDIDP
Bra022567.1 159 3.92e-40 GTISRANETI NLPAPTFNVSQLIQSFAARGLSVKDMVTLSGGHTIGFSHCSSFEARLQ NFSKFHDVDP
Bra031309.1 159 7.76e-40 RISNLTEASN NIPPPTSNLTTLQRLFANQGLNLKDLVLLSGAHTIGVSHCSSMNTRLY NFSTTVKQDP
Bra035235.1 160 9.19e-40 RISNATEALN NIPPPFGNFSTLITLFGNQGLDVKDLVLLSGAHTIGVSHCSSFSNRLF NFTGVGDQDP
Bra032476.1 156 5.57e-39 DGRVSNISEA NLPSPFANVTTLKKNFADKGLNTKDLVVLSGAHTIGVSSCGLISSRIY NFTGKGDSDP
Bra011683.1 557 5.57e-39 RSASLSGSNN NIPAPNNTFQTILSKFNRQGLDVTDLVALSGSHTIGFSRCTSFRQRLY NQSGNGRPDM
Bra005458.1 152 8.96e-39 KRSTATNVPP NIPRSNSTVDQLINLFASKGLTVEDLVVLSGSHTIGFAHCKSFVGRLY DFKGIKRPDP
Bra020370.1 157 1.23e-38 KAGFSAANSG VIPSPFSTLKNLINRFKAQGLSVRDMVALSGAHTIGQANCLTFRNRIY NESNIDLSFA
Bra036330.1 181 2.28e-38 TTASLNGANT NIPAPNSTIQNLLTMFQRKGLNQEDLVSLSGGHTIGVARCTTFKQRLY NQNGNNQPDE
Bra028761.1 165 3.10e-38 KTASQAAANS NIPAPSMSLSQLISSFSAVGLSTRDMVALSGAHTIGQSRCVNFRARVY NETNINAAFA
Bra016127.1 184 4.88e-38 AFASQNTTLN NLPPPFANASQLIADFANRNLDITDLVALSGGHTIGIAHCPSFTDRLY PNQDPTMNKS
Bra004014.1 163 6.59e-38 KAASYELATS NIPTPEEGLISIISKFHNQGLSVEDMVALSGAHTIGKAQCRNFRSRIY GDFHVTSALN
Bra039920.1 170 8.87e-38 RSASLSGSNN NIPAPNNTFNTILSRFTNQGLDLTDLVALSGSHTIGFSRCTSFRQRLY NQSGNGSPDI
Bra006769.1 164 1.19e-37 TASFTTANSG VIPPPTSTLDNLINRFRAQGLSSRDMVALSGAHTIGQARCVTFRDRIY NESNNIELSF
Bra032475.1 155 2.14e-37 DGRISRISEA NLPSPFANVDTLKKNFSDKGLNTKDLVVLSGSHTIGVSSCGLISSRIY NFTGRGDFDP
Bra024102.1 161 3.81e-37 RLSTKASVQN NLPQPGFNLNQLNAMFNRHGLSQTDMIALSGAHTLGFAHCGKFSNRIY NFSPRTRIDP
Bra003918.1 184 5.06e-37 AFASQNTTLN NLPPPFAKASQLITDFANRNLNITDLVALSGGHTIGIAHCPSFTGRLY PNQDPTMNKF
Bra022090.1 166 2.04e-36 LESKAHKVRG NVPMPNQTVHDIHGMFKKNGFSLREMVALSGAHTIGFSHCKEFSDRLY GSKADPEINP
Bra017830.1 87 2.34e-36 LSSTADSVEG KLPHPTDNVNQLTSLFAKNGLSRKDMIALSGAHTLGFAHCKLVFNRIY NFNSTTQVDP
Bra032477.1 157 2.68e-36 DGRISRKSEV NLPSPFAGIAALKKNFFDKGLNTKDLVVLSGAHTIGISNCGLINSRIY NFTGKGDFDP
Bra015403.1 157 6.03e-36 DGRISRKSEV NLPSPLSGIAALKKKFFDKGLNTRDLVVLSGAHTIGISHCSVIHHGIY NFTGKSDSDS
Bra004343.1 164 1.52e-35 KTASYELAAT NLPTPEEGLVSIISKFYYQGLSVEDMVALVGAHTIGKAQCRNFRSRIY GDFGVTSALN
Bra005850.1 165 1.73e-35 RTASQAAANS SIPAPTSSLSQLITSFANLGFTAREMVALSGAHTIGQAQCRNFRTRIY QETNIDPTFA
Bra012061.1 168 4.87e-35 RGASLSGSNN DIPAPNNTFQTILTKFKRQGLNLVDLVSLSGSHTIGNSRCTSFRQRLY NQSGNGKPDL
Bra016930.1 157 6.27e-35 GRISLASEAS NLPSPLDSVAVQKQKFQAKGLDTHDLVTLLGAHTIGQTDCQFFRYRLY NFTVTGNSDP
Bra011771.1 162 1.51e-34 LSSTAASVEG KLPQPTDDVNKLTSLFAKNGLSLNEMIALSGAHTLGFAHCTKVFNRIY SFNKTTQVDP
Bra008775.1 99 2.19e-34 LVSHASSVDG KLPGPELDVTGLVNLFASNGLSITDMIALSGAHTLGFSHCDRFAHRLY NFSALMPVDP
Bra023509.1 166 8.32e-34 RVTNINEARS NLPSPLNNITSLITQFSSKGLDKKDLAVLSGGHTVGQGHCPLILNRLY NFTGKGDSDP
Bra026207.1 158 8.32e-34 AAFRAIADSG DLPSFRASLDELSDLFLRKGLNTRDLVALSGAHTLGQAQCVTFKERLY DNSSDIDAGF
Bra020191.1 162 1.19e-33 DGRESLASTV DLPGPQMSVSDTFKMFEKRKLSLTDMVVLLGGHTIGVAHCSFIMDRLY NFKNTGKPDP
Bra037849.1 165 4.32e-33 LVSTAASVNG NLPGPNDNVDKLNKLFAKNKLTQDDMIALSAAHTLGFAHCSKVANRIY NFNRTHPVDP
Bra026822.1 157 6.10e-33 TAFRAIADSG DLPSFRASLDDLSDLFLRKGLNTRDLVALSGAHTLGQATCVTFKERLY DNSSDIDAGF
Bra014895.1 183 7.67e-33 STDSYARDVE KVPSGRRDITALLETFQSYGLNVLDLVVLSGAHTIGKAYCGTIQSRLY NFNATYGTDP
Bra037007.1 149 1.21e-32 GKRSKIEDTR NLPSPFLNASQLIQTFGQRGFTPQDVVALSGAHTLGVARCQSFKARLT TPDSSMDSSF
Bra039872.1 174 1.21e-32 SKNSYARDVE KVPSGRRDITGLLETFQSYGLNVLDLVVLSGAHTIGKAYCGTIQSRLY NFNATHGTDP
Bra009220.1 170 4.13e-32 LTANQAGANS SIPSPVESLTNITSKFSAVGLNTNDLVALSGAHTFGRARCGVFSNRLF NFSGSGNPDP
Bra024635.1 159 1.11e-31 LDSDMNRVEG KLARPNMTMDHIISIFGSAGLTVQEMVALVGSHTIGFSHCKEFASRIF NSNAEHSADF
Bra026470.1 152 1.53e-31 HMDFKCRRAV DLPSPSISVEESLAYFKSKGLDVLDMTTLLGAHSMGKTHCSHIVNRLY NFKNTGKPDP
Bra020072.1 154 1.70e-31 GLVANQSSAN NLPSPFEPLDAITAKFVAVGLNVADVVALSGAHTFGQAKCDVFSNRLF NFDGAGSPDA
Bra037713.1 166 2.10e-30 DGLTSDKQTV DLPSPSISWDASMAYFKSRGLNVLDMATLLGSHSMGRTHCSYIVDRLY NFNKTGKPSP
Bra011475.1 206 3.16e-30 VVAFKEIAER ELPSPQASISVILARFGTRGFNERETVSLFGAHSIGITHCTFFEDRLY NFSGTGKPDP
Bra033040.1 160 3.87e-30 RTSKASLLAS LLPLPSSPIAKTIRQFESRGFSVQEMVALSGAHSIGFSHCKEFVGLVG RNSTGYNPRF
Bra031933.1 156 4.28e-30 GRVSLASNAN NLPGAGDSVAVQQQKFSAVRLSTRELVVLVGGHTIGQAGCGAFRNRLY NSTTGPADTT
Bra039059.1 167 1.16e-29 RTSKASLLAD LLPLPSSPMAKTIRQFESRGFTVQEMVALSGAHSIGFSHCKEFVGLVG RNSTGYNPRF
Bra001084.1 158 1.91e-27 FVSNSEDAEG ILPGPGLPVPDMLTFFGNKGMDVFDAVALLGAHTVGIGSCGNFVDRLT NFQGTGQPDP
Bra006423.1 150 6.08e-27 DGLVSNDVDV ALPGPTISVAGAVSLFTDKGMNVFDAVALIGAHTVGKGNCGLFSDRFT NFQGTGRPDP
Bra013576.1 166 2.92e-26 RKSRTDMLES YLPDHNESISVVLEKFKSIGIDTPGLVALLGSHSVGRTHCVKLVHRLY PEVDPSLNPD
Bra013938.1 157 5.79e-26 GRVSNLSLAK DMPDVSDSIEILKDKFMQKGLHAKELVLLSAAHTIGTTACFFMTKRLY SFLPGGQPDP
--------------------------------------------------------------------------------
--------------------------------------------------------------------------------
	Motif NLPSPTSNVSQLJSKFASKGLNVKDLVALSGAHTIGFAHCSSFRNRLY MEME-4 block diagrams
--------------------------------------------------------------------------------
SEQUENCE NAME POSITION P-VALUE MOTIF DIAGRAM
------------- ---------------- -------------
Bra015404.1 3.2e-42 158_[4]_120
Bra023862.1 2.2e-41 161_[4]_120
Bra028285.1 8e-41 158_[4]_116
Bra022567.1 3.9e-40 158_[4]_116
Bra031309.1 7.8e-40 158_[4]_120
Bra035235.1 9.2e-40 159_[4]_119
Bra032476.1 5.6e-39 155_[4]_117
Bra011683.1 5.6e-39 556_[4]_119
Bra005458.1 9e-39 151_[4]_119
Bra020370.1 1.2e-38 156_[4]_112
Bra036330.1 2.3e-38 180_[4]_119
Bra028761.1 3.1e-38 164_[4]_112
Bra016127.1 4.9e-38 183_[4]_131
Bra004014.1 6.6e-38 162_[4]_124
Bra039920.1 8.9e-38 169_[4]_119
Bra006769.1 1.2e-37 163_[4]_154
Bra032475.1 2.1e-37 154_[4]_117
Bra024102.1 3.8e-37 160_[4]_117
Bra003918.1 5.1e-37 183_[4]_131
Bra022090.1 2e-36 165_[4]_118
Bra017830.1 2.3e-36 86_[4]_117
Bra032477.1 2.7e-36 156_[4]_117
Bra015403.1 6e-36 156_[4]_116
Bra004343.1 1.5e-35 163_[4]_124
Bra005850.1 1.7e-35 164_[4]_112
Bra012061.1 4.9e-35 167_[4]_95
Bra016930.1 6.3e-35 156_[4]_122
Bra011771.1 1.5e-34 161_[4]_117
Bra008775.1 2.2e-34 98_[4]_118
Bra023509.1 8.3e-34 165_[4]_117
Bra026207.1 8.3e-34 157_[4]_112
Bra020191.1 1.2e-33 161_[4]_124
Bra037849.1 4.3e-33 164_[4]_117
Bra026822.1 6.1e-33 156_[4]_84
Bra014895.1 7.7e-33 182_[4]_121
Bra037007.1 1.2e-32 148_[4]_108
Bra039872.1 1.2e-32 173_[4]_121
Bra009220.1 4.1e-32 169_[4]_121
Bra024635.1 1.1e-31 158_[4]_125
Bra026470.1 1.5e-31 151_[4]_127
Bra020072.1 1.7e-31 153_[4]_123
Bra037713.1 2.1e-30 165_[4]_122
Bra011475.1 3.2e-30 205_[4]_148
Bra033040.1 3.9e-30 159_[4]_112
Bra031933.1 4.3e-30 155_[4]_116
Bra039059.1 1.2e-29 166_[4]_112
Bra001084.1 1.9e-27 157_[4]_118
Bra006423.1 6.1e-27 149_[4]_113
Bra013576.1 2.9e-26 165_[4]_118
Bra013938.1 5.8e-26 156_[4]_122
--------------------------------------------------------------------------------
--------------------------------------------------------------------------------
	Motif NLPSPTSNVSQLJSKFASKGLNVKDLVALSGAHTIGFAHCSSFRNRLY MEME-4 in BLOCKS format
--------------------------------------------------------------------------------
BL MOTIF NLPSPTSNVSQLJSKFASKGLNVKDLVALSGAHTIGFAHCSSFRNRLY width=48 seqs=50
Bra015404.1 ( 159) NIPPPTSNFTNLQTLFANQGLDLKDLVLLSGAHTIGVSHCSSFTNRLY 1
Bra023862.1 ( 162) NIPGPTSNFTTLQQRFAKQGLNLKDLVLLSGAHTIGVSHCSSMSERLY 1
Bra028285.1 ( 159) NLPGPTFNVSQLIQSFAARGLSVKDMVTLSGGHTIGFSHCSSFEARLH 1
Bra022567.1 ( 159) NLPAPTFNVSQLIQSFAARGLSVKDMVTLSGGHTIGFSHCSSFEARLQ 1
Bra031309.1 ( 159) NIPPPTSNLTTLQRLFANQGLNLKDLVLLSGAHTIGVSHCSSMNTRLY 1
Bra035235.1 ( 160) NIPPPFGNFSTLITLFGNQGLDVKDLVLLSGAHTIGVSHCSSFSNRLF 1
Bra032476.1 ( 156) NLPSPFANVTTLKKNFADKGLNTKDLVVLSGAHTIGVSSCGLISSRIY 1
Bra011683.1 ( 557) NIPAPNNTFQTILSKFNRQGLDVTDLVALSGSHTIGFSRCTSFRQRLY 1
Bra005458.1 ( 152) NIPRSNSTVDQLINLFASKGLTVEDLVVLSGSHTIGFAHCKSFVGRLY 1
Bra020370.1 ( 157) VIPSPFSTLKNLINRFKAQGLSVRDMVALSGAHTIGQANCLTFRNRIY 1
Bra036330.1 ( 181) NIPAPNSTIQNLLTMFQRKGLNQEDLVSLSGGHTIGVARCTTFKQRLY 1
Bra028761.1 ( 165) NIPAPSMSLSQLISSFSAVGLSTRDMVALSGAHTIGQSRCVNFRARVY 1
Bra016127.1 ( 184) NLPPPFANASQLIADFANRNLDITDLVALSGGHTIGIAHCPSFTDRLY 1
Bra004014.1 ( 163) NIPTPEEGLISIISKFHNQGLSVEDMVALSGAHTIGKAQCRNFRSRIY 1
Bra039920.1 ( 170) NIPAPNNTFNTILSRFTNQGLDLTDLVALSGSHTIGFSRCTSFRQRLY 1
Bra006769.1 ( 164) VIPPPTSTLDNLINRFRAQGLSSRDMVALSGAHTIGQARCVTFRDRIY 1
Bra032475.1 ( 155) NLPSPFANVDTLKKNFSDKGLNTKDLVVLSGSHTIGVSSCGLISSRIY 1
Bra024102.1 ( 161) NLPQPGFNLNQLNAMFNRHGLSQTDMIALSGAHTLGFAHCGKFSNRIY 1
Bra003918.1 ( 184) NLPPPFAKASQLITDFANRNLNITDLVALSGGHTIGIAHCPSFTGRLY 1
Bra022090.1 ( 166) NVPMPNQTVHDIHGMFKKNGFSLREMVALSGAHTIGFSHCKEFSDRLY 1
Bra017830.1 ( 87) KLPHPTDNVNQLTSLFAKNGLSRKDMIALSGAHTLGFAHCKLVFNRIY 1
Bra032477.1 ( 157) NLPSPFAGIAALKKNFFDKGLNTKDLVVLSGAHTIGISNCGLINSRIY 1
Bra015403.1 ( 157) NLPSPLSGIAALKKKFFDKGLNTRDLVVLSGAHTIGISHCSVIHHGIY 1
Bra004343.1 ( 164) NLPTPEEGLVSIISKFYYQGLSVEDMVALVGAHTIGKAQCRNFRSRIY 1
Bra005850.1 ( 165) SIPAPTSSLSQLITSFANLGFTAREMVALSGAHTIGQAQCRNFRTRIY 1
Bra012061.1 ( 168) DIPAPNNTFQTILTKFKRQGLNLVDLVSLSGSHTIGNSRCTSFRQRLY 1
Bra016930.1 ( 157) NLPSPLDSVAVQKQKFQAKGLDTHDLVTLLGAHTIGQTDCQFFRYRLY 1
Bra011771.1 ( 162) KLPQPTDDVNKLTSLFAKNGLSLNEMIALSGAHTLGFAHCTKVFNRIY 1
Bra008775.1 ( 99) KLPGPELDVTGLVNLFASNGLSITDMIALSGAHTLGFSHCDRFAHRLY 1
Bra023509.1 ( 166) NLPSPLNNITSLITQFSSKGLDKKDLAVLSGGHTVGQGHCPLILNRLY 1
Bra026207.1 ( 158) DLPSFRASLDELSDLFLRKGLNTRDLVALSGAHTLGQAQCVTFKERLY 1
Bra020191.1 ( 162) DLPGPQMSVSDTFKMFEKRKLSLTDMVVLLGGHTIGVAHCSFIMDRLY 1
Bra037849.1 ( 165) NLPGPNDNVDKLNKLFAKNKLTQDDMIALSAAHTLGFAHCSKVANRIY 1
Bra026822.1 ( 157) DLPSFRASLDDLSDLFLRKGLNTRDLVALSGAHTLGQATCVTFKERLY 1
Bra014895.1 ( 183) KVPSGRRDITALLETFQSYGLNVLDLVVLSGAHTIGKAYCGTIQSRLY 1
Bra037007.1 ( 149) NLPSPFLNASQLIQTFGQRGFTPQDVVALSGAHTLGVARCQSFKARLT 1
Bra039872.1 ( 174) KVPSGRRDITGLLETFQSYGLNVLDLVVLSGAHTIGKAYCGTIQSRLY 1
Bra009220.1 ( 170) SIPSPVESLTNITSKFSAVGLNTNDLVALSGAHTFGRARCGVFSNRLF 1
Bra024635.1 ( 159) KLARPNMTMDHIISIFGSAGLTVQEMVALVGSHTIGFSHCKEFASRIF 1
Bra026470.1 ( 152) DLPSPSISVEESLAYFKSKGLDVLDMTTLLGAHSMGKTHCSHIVNRLY 1
Bra020072.1 ( 154) NLPSPFEPLDAITAKFVAVGLNVADVVALSGAHTFGQAKCDVFSNRLF 1
Bra037713.1 ( 166) DLPSPSISWDASMAYFKSRGLNVLDMATLLGSHSMGRTHCSYIVDRLY 1
Bra011475.1 ( 206) ELPSPQASISVILARFGTRGFNERETVSLFGAHSIGITHCTFFEDRLY 1
Bra033040.1 ( 160) LLPLPSSPIAKTIRQFESRGFSVQEMVALSGAHSIGFSHCKEFVGLVG 1
Bra031933.1 ( 156) NLPGAGDSVAVQQQKFSAVRLSTRELVVLVGGHTIGQAGCGAFRNRLY 1
Bra039059.1 ( 167) LLPLPSSPMAKTIRQFESRGFTVQEMVALSGAHSIGFSHCKEFVGLVG 1
Bra001084.1 ( 158) ILPGPGLPVPDMLTFFGNKGMDVFDAVALLGAHTVGIGSCGNFVDRLT 1
Bra006423.1 ( 150) ALPGPTISVAGAVSLFTDKGMNVFDAVALIGAHTVGKGNCGLFSDRFT 1
Bra013576.1 ( 166) YLPDHNESISVVLEKFKSIGIDTPGLVALLGSHSVGRTHCVKLVHRLY 1
Bra013938.1 ( 157) DMPDVSDSIEILKDKFMQKGLHAKELVLLSAAHTIGTTACFFMTKRLY 1
//
--------------------------------------------------------------------------------
--------------------------------------------------------------------------------
	Motif NLPSPTSNVSQLJSKFASKGLNVKDLVALSGAHTIGFAHCSSFRNRLY MEME-4 position-specific scoring matrix
--------------------------------------------------------------------------------
log-odds matrix: alength= 20 w= 48 n= 33577 bayes= 11.4986 E= 1.1e-1023
-149 -471 100 -30 -457 -377 -194 -121 129 -125 -294 312 -366 -155 -272 -93 -262 -85 -270 -15
-627 -602 -921 -766 -425 -845 -684 261 -790 266 8 -842 -760 -654 -798 -831 -599 -17 -411 -534
-185 -591 -587 -478 -655 -561 -483 -581 -499 -592 -552 -593 443 -464 -569 -492 -487 -571 -492 -591
71 -475 -59 -136 -460 101 36 -386 -160 -126 -11 -264 126 57 -48 179 -35 -381 -269 -299
-170 -493 -461 -346 -72 -107 -1 -451 -366 -464 -424 -469 420 -333 -441 -201 -366 -195 -389 -475
-275 -471 -296 78 157 -31 -191 -376 -163 -74 -292 158 -362 56 34 39 170 -167 -268 -300
88 -473 79 138 2 -165 -189 19 -160 -75 134 50 -360 -12 -49 119 -257 -378 -268 -299
-515 -644 39 -337 -713 18 -320 -726 -115 -741 -674 233 79 -387 -544 162 164 -720 -534 -500
-42 -416 -656 -491 112 -551 -413 202 -500 130 97 -543 -539 -442 -535 -489 -367 209 212 -343
71 -475 134 35 -461 -373 36 -124 -54 -404 -295 50 -109 103 -263 119 156 -169 -269 -299
27 -475 26 35 -461 -31 36 -124 81 -404 -295 79 -359 258 -263 -46 140 4 -269 -299
-199 -389 -583 -412 -303 -523 -359 172 -427 270 17 -498 -460 4 -448 -144 -20 -136 -219 -310
-320 -355 -546 -383 -121 -471 22 272 120 101 14 -52 -465 128 -446 -110 50 -49 -212 -283
51 -476 -10 78 -462 -165 -189 -389 130 -405 -297 50 -360 190 -1 106 140 -383 -271 -300
-274 -472 -59 -138 -145 -374 -190 -122 208 101 174 14 -360 103 63 -12 13 -376 -268 75
-892 -813 -874 -864 424 -790 -695 -846 -879 -802 -812 -889 -794 -825 -876 -900 -871 -891 -530 -540
164 -475 -293 78 -53 37 36 -387 130 -126 -11 -34 -359 138 -119 16 -35 -169 -269 -15
104 -484 56 -145 -471 -377 -195 -398 130 -414 -306 159 -368 56 87 120 -109 -392 -279 -15
-169 -532 -383 -214 -535 -444 32 -125 248 -213 -354 80 -434 275 163 -361 -328 7 -321 77
-314 -478 -385 -360 -576 365 -363 -516 -80 -591 -452 -91 -474 -413 -202 -376 -444 -506 -300 -435
-594 -576 -808 -635 109 -759 -566 -91 -654 306 96 -736 -655 -536 -656 -717 -561 -392 -344 -468
-518 -646 162 -339 -716 -408 30 -732 -416 -747 -683 269 -545 -390 -548 172 106 -726 -537 -502
-85 -368 -468 -79 -354 -451 -298 43 -108 69 -204 -402 -116 91 -151 -186 187 222 -220 -285
-146 -475 -133 111 -53 -373 36 -387 220 -37 -295 -34 -109 138 155 -282 122 -169 -269 -299
-435 -569 362 195 -605 -206 -330 -523 -401 -576 -488 -251 -520 -322 -511 -451 -459 -527 -386 -452
-103 -567 -857 -697 -410 -742 -609 -272 -713 235 416 -757 -705 -603 -729 -701 -146 -71 -377 -491
-96 -309 -485 -363 -414 -491 -341 92 -412 -308 -264 -479 -418 -400 -431 -449 -136 347 -316 -435
272 -410 -691 -571 -590 -433 -542 -441 -610 0 -442 -594 -554 -537 -631 -49 80 142 -433 -537
-872 -813 -892 -877 -706 -800 -748 -624 -891 337 -565 -916 -801 -811 -880 -933 -841 -743 -591 -734
-564 -558 -856 -707 -129 -762 -633 -80 -726 40 -278 -764 -723 -632 -754 308 -540 -13 -407 -500
-117 -501 -431 -405 -614 372 -406 -556 -429 -627 -491 -394 -508 -455 -474 -408 -471 -538 -341 -476
304 -451 -750 -658 -732 116 -624 -670 -716 -712 -595 -633 -566 -596 -706 86 -433 -546 -540 -667
-946 -862 -889 -899 -921 -797 588 -1005 -912 -950 -980 -925 -810 -859 -900 -953 -909 -1013 -651 -796
-404 -453 -583 -525 -604 -544 -468 -447 -488 -585 -408 -422 -545 -441 -540 43 393 -443 -406 -537
-418 -444 -536 -440 -89 -556 -448 380 -438 46 61 -490 -531 -430 -520 -486 -363 53 -277 -338
-734 -797 -774 -762 -886 382 -699 -897 -782 -900 -849 -764 -764 -775 -804 -785 -808 -891 -606 -763
-388 -455 -534 -345 229 -507 -313 127 134 -371 -289 -138 -503 262 4 -441 -128 126 -290 -360
243 -453 -753 -663 -736 -20 -627 -676 -721 -718 -600 -634 -566 -598 -710 208 110 -551 -544 -671
-230 -403 -187 -295 -342 -222 511 -445 -165 -397 -295 -11 -408 109 77 -101 -167 -435 -149 75
-476 526 -632 -509 -595 -615 -494 -482 -590 -571 -460 -599 -599 -543 -586 -579 -472 -567 -454 -554
-273 -475 -59 -136 -145 133 -189 -385 130 -207 -295 -264 31 57 -1 119 101 34 -269 -299
-147 -471 -295 111 42 -374 36 -378 81 18 -292 79 -360 -149 -120 142 122 -34 -268 -15
-626 -601 -925 -773 359 -844 -686 205 -796 -151 150 -843 -765 -660 -806 -829 -599 -17 -412 -530
-35 -475 -293 78 -53 -373 36 -386 81 -207 -11 -34 -359 57 168 92 49 80 -269 -299
-1 -485 119 77 -472 8 174 -399 -59 -416 -308 199 -368 138 -275 77 -36 -394 -281 -15
-419 -381 -521 -433 -553 -266 -201 -435 -158 -222 -408 -403 -401 -246 388 -453 -423 -538 -189 -403
-630 -605 -921 -764 -127 -844 -677 251 -787 271 -255 -841 -757 -647 -792 -829 -602 -18 -405 -529
-415 -443 -519 -404 82 -98 48 -399 -439 -408 -347 -472 -493 -70 -473 -446 -5 -430 -71 506
--------------------------------------------------------------------------------
--------------------------------------------------------------------------------
	Motif NLPSPTSNVSQLJSKFASKGLNVKDLVALSGAHTIGFAHCSSFRNRLY MEME-4 position-specific probability matrix
--------------------------------------------------------------------------------
letter-probability matrix: alength= 20 w= 48 nsites= 50 E= 1.1e-1023
0.020000 0.000000 0.140000 0.020000 0.000000 0.000000 0.000000 0.020000 0.120000 0.040000 0.000000 0.540000 0.000000 0.000000 0.000000 0.040000 0.000000 0.040000 0.000000 0.020000
0.000000 0.000000 0.000000 0.000000 0.000000 0.000000 0.000000 0.300000 0.000000 0.620000 0.020000 0.000000 0.000000 0.000000 0.000000 0.000000 0.000000 0.060000 0.000000 0.000000
0.020000 0.000000 0.000000 0.000000 0.000000 0.000000 0.000000 0.000000 0.000000 0.000000 0.000000 0.000000 0.980000 0.000000 0.000000 0.000000 0.000000 0.000000 0.000000 0.000000
0.140000 0.000000 0.040000 0.000000 0.000000 0.160000 0.020000 0.000000 0.000000 0.040000 0.020000 0.000000 0.120000 0.040000 0.040000 0.340000 0.040000 0.000000 0.000000 0.000000
0.020000 0.000000 0.000000 0.000000 0.040000 0.040000 0.020000 0.000000 0.000000 0.000000 0.000000 0.000000 0.840000 0.000000 0.000000 0.020000 0.000000 0.020000 0.000000 0.000000
0.000000 0.000000 0.000000 0.060000 0.180000 0.060000 0.000000 0.000000 0.000000 0.060000 0.000000 0.180000 0.000000 0.040000 0.080000 0.120000 0.200000 0.020000 0.000000 0.000000
0.160000 0.000000 0.120000 0.100000 0.060000 0.020000 0.000000 0.060000 0.000000 0.060000 0.060000 0.080000 0.000000 0.020000 0.040000 0.220000 0.000000 0.000000 0.000000 0.000000
0.000000 0.000000 0.080000 0.000000 0.000000 0.080000 0.000000 0.000000 0.020000 0.000000 0.000000 0.280000 0.080000 0.000000 0.000000 0.280000 0.180000 0.000000 0.000000 0.000000
0.060000 0.000000 0.000000 0.000000 0.120000 0.000000 0.000000 0.200000 0.000000 0.240000 0.040000 0.000000 0.000000 0.000000 0.000000 0.000000 0.000000 0.320000 0.020000 0.000000
0.140000 0.000000 0.180000 0.040000 0.000000 0.000000 0.020000 0.020000 0.020000 0.000000 0.000000 0.080000 0.020000 0.060000 0.000000 0.220000 0.180000 0.020000 0.000000 0.000000
0.100000 0.000000 0.080000 0.040000 0.000000 0.060000 0.020000 0.020000 0.080000 0.000000 0.000000 0.100000 0.000000 0.200000 0.000000 0.060000 0.160000 0.080000 0.000000 0.000000
0.020000 0.000000 0.000000 0.000000 0.000000 0.000000 0.000000 0.200000 0.000000 0.600000 0.020000 0.000000 0.000000 0.040000 0.000000 0.040000 0.060000 0.020000 0.000000 0.000000
0.000000 0.000000 0.000000 0.000000 0.020000 0.000000 0.020000 0.340000 0.120000 0.200000 0.020000 0.040000 0.000000 0.080000 0.000000 0.040000 0.080000 0.040000 0.000000 0.000000
0.120000 0.000000 0.060000 0.060000 0.000000 0.020000 0.000000 0.000000 0.120000 0.000000 0.000000 0.080000 0.000000 0.120000 0.060000 0.200000 0.160000 0.000000 0.000000 0.000000
0.000000 0.000000 0.040000 0.000000 0.020000 0.000000 0.000000 0.020000 0.220000 0.220000 0.080000 0.060000 0.000000 0.060000 0.100000 0.080000 0.060000 0.000000 0.000000 0.040000
0.000000 0.000000 0.000000 0.000000 1.000000 0.000000 0.000000 0.000000 0.000000 0.000000 0.000000 0.000000 0.000000 0.000000 0.000000 0.000000 0.000000 0.000000 0.000000 0.000000
0.280000 0.000000 0.000000 0.060000 0.040000 0.100000 0.020000 0.000000 0.120000 0.040000 0.020000 0.040000 0.000000 0.080000 0.020000 0.100000 0.040000 0.020000 0.000000 0.020000
0.180000 0.000000 0.100000 0.000000 0.000000 0.000000 0.000000 0.000000 0.120000 0.000000 0.000000 0.180000 0.000000 0.040000 0.120000 0.220000 0.020000 0.000000 0.000000 0.020000
0.020000 0.000000 0.000000 0.000000 0.000000 0.000000 0.020000 0.020000 0.280000 0.020000 0.000000 0.100000 0.000000 0.220000 0.200000 0.000000 0.000000 0.080000 0.000000 0.040000
0.000000 0.000000 0.000000 0.000000 0.000000 0.900000 0.000000 0.000000 0.040000 0.000000 0.000000 0.040000 0.000000 0.000000 0.020000 0.000000 0.000000 0.000000 0.000000 0.000000
0.000000 0.000000 0.000000 0.000000 0.120000 0.000000 0.000000 0.020000 0.000000 0.820000 0.040000 0.000000 0.000000 0.000000 0.000000 0.000000 0.000000 0.000000 0.000000 0.000000
0.000000 0.000000 0.200000 0.000000 0.000000 0.000000 0.020000 0.000000 0.000000 0.000000 0.000000 0.360000 0.000000 0.000000 0.000000 0.300000 0.120000 0.000000 0.000000 0.000000
0.040000 0.000000 0.000000 0.020000 0.000000 0.000000 0.000000 0.060000 0.020000 0.160000 0.000000 0.000000 0.020000 0.060000 0.020000 0.020000 0.220000 0.360000 0.000000 0.000000
0.020000 0.000000 0.020000 0.080000 0.040000 0.000000 0.020000 0.000000 0.240000 0.080000 0.000000 0.040000 0.020000 0.080000 0.200000 0.000000 0.140000 0.020000 0.000000 0.000000
0.000000 0.000000 0.800000 0.180000 0.000000 0.020000 0.000000 0.000000 0.000000 0.000000 0.000000 0.000000 0.000000 0.000000 0.000000 0.000000 0.000000 0.000000 0.000000 0.000000
0.040000 0.000000 0.000000 0.000000 0.000000 0.000000 0.000000 0.000000 0.000000 0.500000 0.400000 0.000000 0.000000 0.000000 0.000000 0.000000 0.020000 0.040000 0.000000 0.000000
0.040000 0.000000 0.000000 0.000000 0.000000 0.000000 0.000000 0.100000 0.000000 0.000000 0.000000 0.000000 0.000000 0.000000 0.000000 0.000000 0.020000 0.840000 0.000000 0.000000
0.540000 0.000000 0.000000 0.000000 0.000000 0.000000 0.000000 0.000000 0.000000 0.100000 0.000000 0.000000 0.000000 0.000000 0.000000 0.060000 0.100000 0.200000 0.000000 0.000000
0.000000 0.000000 0.000000 0.000000 0.000000 0.000000 0.000000 0.000000 0.000000 1.000000 0.000000 0.000000 0.000000 0.000000 0.000000 0.000000 0.000000 0.000000 0.000000 0.000000
0.000000 0.000000 0.000000 0.000000 0.020000 0.000000 0.000000 0.020000 0.000000 0.120000 0.000000 0.000000 0.000000 0.000000 0.000000 0.780000 0.000000 0.060000 0.000000 0.000000
0.040000 0.000000 0.000000 0.000000 0.000000 0.960000 0.000000 0.000000 0.000000 0.000000 0.000000 0.000000 0.000000 0.000000 0.000000 0.000000 0.000000 0.000000 0.000000 0.000000
0.680000 0.000000 0.000000 0.000000 0.000000 0.160000 0.000000 0.000000 0.000000 0.000000 0.000000 0.000000 0.000000 0.000000 0.000000 0.160000 0.000000 0.000000 0.000000 0.000000
0.000000 0.000000 0.000000 0.000000 0.000000 0.000000 1.000000 0.000000 0.000000 0.000000 0.000000 0.000000 0.000000 0.000000 0.000000 0.000000 0.000000 0.000000 0.000000 0.000000
0.000000 0.000000 0.000000 0.000000 0.000000 0.000000 0.000000 0.000000 0.000000 0.000000 0.000000 0.000000 0.000000 0.000000 0.000000 0.120000 0.880000 0.000000 0.000000 0.000000
0.000000 0.000000 0.000000 0.000000 0.040000 0.000000 0.000000 0.680000 0.000000 0.160000 0.040000 0.000000 0.000000 0.000000 0.000000 0.000000 0.000000 0.080000 0.000000 0.000000
0.000000 0.000000 0.000000 0.000000 0.000000 1.000000 0.000000 0.000000 0.000000 0.000000 0.000000 0.000000 0.000000 0.000000 0.000000 0.000000 0.000000 0.000000 0.000000 0.000000
0.000000 0.000000 0.000000 0.000000 0.280000 0.000000 0.000000 0.120000 0.120000 0.000000 0.000000 0.020000 0.000000 0.200000 0.060000 0.000000 0.020000 0.180000 0.000000 0.000000
0.440000 0.000000 0.000000 0.000000 0.000000 0.060000 0.000000 0.000000 0.000000 0.000000 0.000000 0.000000 0.000000 0.000000 0.000000 0.380000 0.120000 0.000000 0.000000 0.000000
0.020000 0.000000 0.020000 0.000000 0.000000 0.020000 0.500000 0.000000 0.020000 0.000000 0.000000 0.060000 0.000000 0.080000 0.160000 0.060000 0.020000 0.000000 0.000000 0.040000
0.000000 1.000000 0.000000 0.000000 0.000000 0.000000 0.000000 0.000000 0.000000 0.000000 0.000000 0.000000 0.000000 0.000000 0.000000 0.000000 0.000000 0.000000 0.000000 0.000000
0.000000 0.000000 0.040000 0.000000 0.020000 0.200000 0.000000 0.000000 0.120000 0.020000 0.000000 0.000000 0.060000 0.040000 0.060000 0.220000 0.120000 0.100000 0.000000 0.000000
0.020000 0.000000 0.000000 0.080000 0.080000 0.000000 0.020000 0.000000 0.080000 0.120000 0.000000 0.100000 0.000000 0.000000 0.020000 0.260000 0.140000 0.060000 0.000000 0.020000
0.000000 0.000000 0.000000 0.000000 0.660000 0.000000 0.000000 0.200000 0.000000 0.020000 0.060000 0.000000 0.000000 0.000000 0.000000 0.000000 0.000000 0.060000 0.000000 0.000000
0.060000 0.000000 0.000000 0.060000 0.040000 0.000000 0.020000 0.000000 0.080000 0.020000 0.020000 0.040000 0.000000 0.040000 0.220000 0.180000 0.080000 0.140000 0.000000 0.000000
0.080000 0.000000 0.160000 0.060000 0.000000 0.080000 0.060000 0.000000 0.020000 0.000000 0.000000 0.240000 0.000000 0.080000 0.000000 0.160000 0.040000 0.000000 0.000000 0.020000
0.000000 0.000000 0.000000 0.000000 0.000000 0.020000 0.000000 0.000000 0.000000 0.040000 0.000000 0.000000 0.000000 0.000000 0.940000 0.000000 0.000000 0.000000 0.000000 0.000000
0.000000 0.000000 0.000000 0.000000 0.020000 0.000000 0.000000 0.280000 0.000000 0.640000 0.000000 0.000000 0.000000 0.000000 0.000000 0.000000 0.000000 0.060000 0.000000 0.000000
0.000000 0.000000 0.000000 0.000000 0.080000 0.040000 0.020000 0.000000 0.000000 0.000000 0.000000 0.000000 0.000000 0.020000 0.000000 0.000000 0.060000 0.000000 0.000000 0.780000
--------------------------------------------------------------------------------
--------------------------------------------------------------------------------
	Motif NLPSPTSNVSQLJSKFASKGLNVKDLVALSGAHTIGFAHCSSFRNRLY MEME-4 regular expression
--------------------------------------------------------------------------------
N[LI]PSPTS[NS][VLI]SQ[LI][IL]S[KL]FAS[KQR]GL[NSD][VT][KR]D[LM]V[AV]LSGAHTIG[FQ][AS]HC[SG]S[FI]RNR[LI]Y
--------------------------------------------------------------------------------
Time 593.31 secs.
********************************************************************************
********************************************************************************
MOTIF DPRJAAALLRLHFHDCFVRGCDGSVLLDS MEME-5	width = 29 sites = 50 llr = 3042 E-value = 2.8e-885
********************************************************************************
--------------------------------------------------------------------------------
	Motif DPRJAAALLRLHFHDCFVRGCDGSVLLDS MEME-5 Description
--------------------------------------------------------------------------------
Simplified A 1:1:583:::::::::::::::5::::11
pos.-specific C :::::::::::::::a::::a::::::::
probability D 6:::::::::::::a::::::a:::::71
matrix E 1:::::::::::::::::1::::::::::
F :::::::::::2a:::9::::::::::::
G ::::1:2::::::::::::a::5:::::2
H :::::::::::5:a:::::::::::::::
I :::3:::22::::::::1::::::3:2::
K ::::::1::::::::::::::::::::1:
L :::3:::77:61::::::::::::2a7::
M :::1::::1:4::::::::::::::::::
N 1::1::::::::::::::3:::::::::1
P :7::121:::::::::::::::::::::1
Q 1::::::::::1::::::2::::::::::
R 114::::::a::::::::3::::::::::
S ::2:::3::::::::::::::::a:::13
T :1312:::::::::::::1::::::::::
V :1:1:::1:::::::::9::::::5:1::
W :::::::::::::::::::::::::::::
Y :::::::::::::::::::::::::::::
bits 7.8
7
6.3 *
5.5 * * *
Relative 4.7 * * *
Entropy 3.9 * ***** ***
(87.8 bits) 3.1 * ********* *** * *
2.3 ** * *********** *********
1.6 ****************************
0.8 *****************************
0.0 -----------------------------
Multilevel DPRLAAALLRLHFHDCFVRGCDGSVLLDS
consensus TITPS M N A I I
sequence S L
--------------------------------------------------------------------------------
--------------------------------------------------------------------------------
	Motif DPRJAAALLRLHFHDCFVRGCDGSVLLDS MEME-5 sites sorted by position p-value
--------------------------------------------------------------------------------
Sequence name Start P-value Site
------------- ----- --------- -----------------------------
Bra000059.1 58 5.16e-32 GNIIVREMGS DPRITASLLRLHFHDCFVNGCDASILLDN STSFRTEKDA
Bra018006.1 60 7.69e-32 RATIVNELRS DPRIAASILRLHFHDCFVNGCDASILLDN TTSFRTEKDA
Bra036842.1 63 9.30e-32 QSFVAKAHSN DPRMAASLLRLHFHDCFVNGCDGSLLLDN SGTIESEKRA
Bra023639.1 48 1.36e-31 RNLVRQRFGV DPTVTAALLRMHFHDCFVRGCDASLLIDS TNSEKTAGPN
Bra030607.1 64 7.81e-31 RRVTFQYVSR RPTLAAALLRMHFHDCFVRGCDGSVLLKS PNNDAERDAP
Bra006423.1 48 7.81e-31 RNLVRQRFGV DPTVTAALLRMHFHDCFVRGCDASLLIDA PNSEKTAGPN
Bra009221.1 60 2.40e-30 RSTIEQALQS DPRIGASLIRLHFHDCFVNGCDGSLLLDD SANIQSEKNA
Bra037176.1 61 3.26e-30 QTIVAKAFAQ DPRMPASLLRLHFHDCFVKGCDASILLDN SGTIISEKRS
Bra014200.1 94 4.41e-30 KSGVWRAFKD DSRIAASLLRLHFHDCFVNGCDGSILLDD SEDFKGEKNA
Bra036445.1 50 5.12e-30 QNLVSDEFES DPTITAALLRMHFHDCFVGGCDGSILLNS TDSERFVGPN
Bra011681.1 57 1.06e-29 RSVVAQAVAR ETRMAASLMRLHFHDCFVQGCDGSLLLDS SGRIVSEKSS
Bra001986.1 50 1.06e-29 TNAVKKAMSN DKTVPAALLRMHFHDCFVRGCDASVLLDS KGKNKAEKDG
Bra032474.1 53 1.62e-29 QDFVSNHISN APSLAAALLRMHFHDCFVRGCDGSVLINS TSGNAERDAT
Bra017761.1 57 2.14e-29 RSVVAKAVAR ETRMAASLIRLHFHDCFVQGCDGSLLLDS SGRITSEKNS
Bra038345.1 56 2.14e-29 RKEMECIVKE DPRNAAIIIRLHFHDCFVQGCDGSVLLDE TESLKGEKKA
Bra024268.1 64 2.81e-29 RSVVQSNYFT NPANAPGILRMHFHDCFVRGCDGSILLDG PNSEKTAIPN
Bra030606.1 70 3.22e-29 RRVTFQYVSR RPTLAAALLRMYFHDCFVRGCDGSILLKS PNKDAERDAI
Bra028436.1 52 3.22e-29 RTTVTSHFGS DPKIAPGLLRMHFHDCFVQGCDGSVLISG PNTERTAGAN
Bra019131.1 49 4.21e-29 STVVANSFRS DPSITAALLRMQFHDCFVTGCDASLLIDP RPGRPSEKST
Bra021488.1 53 4.81e-29 RKVVFAAMKK APTLGAPLLRMFFHDCFVRGCDGSVLLDS SNNQAEKNAV
Bra039137.1 53 4.81e-29 KKVVFAAMKK APTLGAPLLRMFFHDCFVRGCDGSVLLDS SNNQAEKNAV
Bra002271.1 6 4.81e-29 MALKA EIRMAASLIRLHFHDCFVNGCDASVLLDG ADSEKLSISN
Bra024269.1 62 4.81e-29 RNAVTAGFSS NPRIAPGILRMHFHDCFVQGCDGSILITG TNTERTAVPN
Bra034561.1 51 1.05e-28 KNSVNNALQA DPTLAAGLIRMLFHDCFIEGCDASILLDS TNDNTAEKDS
Bra000228.1 54 1.05e-28 RSTVESHFDS DPTISPGLLRLHFHDCFVQGCDGSVLIKG KKAEQAALAN
Bra011438.1 43 1.05e-28 QNSVDNALRA DPTLAAGLIRMLFHDCFIEGCDASILLDS TKDNTAEKDS
Bra005346.1 54 1.97e-28 KHNVEVAVLK DPRMAASLLRLQFHDCFVLGCDASVLLDT HGDILSEKQA
Bra002270.1 53 1.97e-28 RGLIEQASRS DVRLTAKVMRLHFHDCFVNGCDGSVLLDA APADGVEGEK
Bra002269.1 53 1.97e-28 RRLIQRAGRS DVRLTAKVMRLHFHDCFVNGCDGSVLLDA APVDGVEGEK
Bra019132.1 49 2.23e-28 ANVVANRFRR DRSITAALLRMQFHDCFVRGCDASLLIDP RPGRPSEKST
Bra013943.1 49 2.23e-28 ANVVANRFRR DRSITAALLRMQFHDCFVRGCDASLLIDP RPGRPSEKST
Bra009105.1 58 3.22e-28 RSTVKSAVDS QPRTGASILRLFFHDCFVNGCDGSILLDD TSSFTGEQNA
Bra020071.1 52 5.20e-28 RGLLEQASRS DVRLTAQVMRLHFHDCFVNGCDGSVLLDA ALADGVEGEK
Bra031934.1 64 5.86e-28 ASVVRKHVQS NPANAPGILRMHFHDCFVRGCDGSVLLAG NKTERTAGPN
Bra024267.1 65 5.86e-28 ASVVRAHVRS NPANAPGILRMHFHDCFVRGCDGSVLLAG NTSERTAVPN
Bra013938.1 53 9.37e-28 KRVVSGASLS DPNLPAILLRLHFHDCFVEGCDGSILVDN GAISEKFAFG
Bra000113.1 82 1.86e-27 NEIVSKKVKA NPSLAAKLLRVHYHDCFVRGCDASLLLDS VAGKAASEKE
Bra023149.1 76 3.05e-26 DTKVREWTKT DPSLGPALLRLLFHDCGVTGCDASILLDH KESERRSPAS
Bra015402.1 53 3.37e-26 RRVTVQYVSR QTSLAAALLRVYFHDCFVRGCDGSVLLKS PNKDAERDAI
Bra033040.1 51 5.60e-26 RDTISSKQIT NPTTAAAVIRLFFHDCFPNGCDASILISS TAFNAAERDS
Bra038526.1 34 1.24e-25 RDEMKKAMIR EARSVASVMRLQFHDCFVNGCDGSVLLDD TPNMLGEKLS
Bra024033.1 85 1.24e-25 RKALKEIYKA RPSIAPSLIRLLFHDCFIEGCDASVLVDA DESQTSEKEA
Bra030241.1 50 1.50e-25 RREMKKAMFK EARSVASVMRLQFHDCFVNGCDASVLLDD TPNMLGEKLS
Bra008715.1 59 1.66e-25 KKSVLDAIKK DRTIGAPLLRMFFHDCFVRGCEGSVLLEL KNKKDEKNAP
Bra022195.1 64 1.66e-25 RSSISPMFAL DPTAPAALLRLMFHDCQVQGCDASILIEP SGDQQFTELD
Bra014895.1 80 6.90e-25 ATKVREWTKK DSSLGPALLRLLFHDCGVTGCDASVLLDH EGSERRSPAS
Bra025604.1 51 1.32e-24 RDTITNKQIT TPTTAAAALRLFFHDCFPNGCDASVLVSS TAFATAERDS
Bra011170.1 53 8.59e-24 RNAVRQKFQQ TFVTAPATLRLFFHDCFVRGCDASILLAS PSERDHPDDM
Bra040175.1 53 1.22e-23 RETVTTTQGP QGRTAAGILRLFFHDCFLEGCDASVLIAK NALNKSERDD
Bra007831.1 62 3.11e-23 RNTVRSASSS DPSVLGKLLRLVFHDCFVQGCDASVLVRG NGTERSDPGN
--------------------------------------------------------------------------------
--------------------------------------------------------------------------------
	Motif DPRJAAALLRLHFHDCFVRGCDGSVLLDS MEME-5 block diagrams
--------------------------------------------------------------------------------
SEQUENCE NAME POSITION P-VALUE MOTIF DIAGRAM
------------- ---------------- -------------
Bra000059.1 5.2e-32 57_[5]_262
Bra018006.1 7.7e-32 59_[5]_266
Bra036842.1 9.3e-32 62_[5]_246
Bra023639.1 1.4e-31 47_[5]_234
Bra030607.1 7.8e-31 63_[5]_240
Bra006423.1 7.8e-31 47_[5]_234
Bra009221.1 2.4e-30 59_[5]_270
Bra037176.1 3.3e-30 60_[5]_248
Bra014200.1 4.4e-30 93_[5]_247
Bra036445.1 5.1e-30 49_[5]_239
Bra011681.1 1.1e-29 56_[5]_246
Bra001986.1 1.1e-29 49_[5]_239
Bra032474.1 1.6e-29 52_[5]_206
Bra017761.1 2.1e-29 56_[5]_246
Bra038345.1 2.1e-29 55_[5]_251
Bra024268.1 2.8e-29 63_[5]_241
Bra030606.1 3.2e-29 69_[5]_242
Bra028436.1 3.2e-29 51_[5]_238
Bra019131.1 4.2e-29 48_[5]_235
Bra021488.1 4.8e-29 52_[5]_238
Bra039137.1 4.8e-29 52_[5]_238
Bra002271.1 4.8e-29 5_[5]_246
Bra024269.1 4.8e-29 61_[5]_238
Bra034561.1 1e-28 50_[5]_233
Bra000228.1 1e-28 53_[5]_245
Bra011438.1 1e-28 42_[5]_233
Bra005346.1 2e-28 53_[5]_251
Bra002270.1 2e-28 52_[5]_249
Bra002269.1 2e-28 52_[5]_249
Bra019132.1 2.2e-28 48_[5]_235
Bra013943.1 2.2e-28 48_[5]_235
Bra009105.1 3.2e-28 57_[5]_191
Bra020071.1 5.2e-28 51_[5]_249
Bra031934.1 5.9e-28 63_[5]_241
Bra024267.1 5.9e-28 64_[5]_241
Bra013938.1 9.4e-28 52_[5]_245
Bra000113.1 1.9e-27 81_[5]_250
Bra023149.1 3e-26 75_[5]_243
Bra015402.1 3.4e-26 52_[5]_240
Bra033040.1 5.6e-26 50_[5]_240
Bra038526.1 1.2e-25 33_[5]_252
Bra024033.1 1.2e-25 84_[5]_281
Bra030241.1 1.5e-25 49_[5]_251
Bra008715.1 1.7e-25 58_[5]_326
Bra022195.1 1.7e-25 63_[5]_246
Bra014895.1 6.9e-25 79_[5]_243
Bra025604.1 1.3e-24 50_[5]_242
Bra011170.1 8.6e-24 52_[5]_243
Bra040175.1 1.2e-23 52_[5]_266
Bra007831.1 3.1e-23 61_[5]_243
--------------------------------------------------------------------------------
--------------------------------------------------------------------------------
	Motif DPRJAAALLRLHFHDCFVRGCDGSVLLDS MEME-5 in BLOCKS format
--------------------------------------------------------------------------------
BL MOTIF DPRJAAALLRLHFHDCFVRGCDGSVLLDS width=29 seqs=50
Bra000059.1 ( 58) DPRITASLLRLHFHDCFVNGCDASILLDN 1
Bra018006.1 ( 60) DPRIAASILRLHFHDCFVNGCDASILLDN 1
Bra036842.1 ( 63) DPRMAASLLRLHFHDCFVNGCDGSLLLDN 1
Bra023639.1 ( 48) DPTVTAALLRMHFHDCFVRGCDASLLIDS 1
Bra030607.1 ( 64) RPTLAAALLRMHFHDCFVRGCDGSVLLKS 1
Bra006423.1 ( 48) DPTVTAALLRMHFHDCFVRGCDASLLIDA 1
Bra009221.1 ( 60) DPRIGASLIRLHFHDCFVNGCDGSLLLDD 1
Bra037176.1 ( 61) DPRMPASLLRLHFHDCFVKGCDASILLDN 1
Bra014200.1 ( 94) DSRIAASLLRLHFHDCFVNGCDGSILLDD 1
Bra036445.1 ( 50) DPTITAALLRMHFHDCFVGGCDGSILLNS 1
Bra011681.1 ( 57) ETRMAASLMRLHFHDCFVQGCDGSLLLDS 1
Bra001986.1 ( 50) DKTVPAALLRMHFHDCFVRGCDASVLLDS 1
Bra032474.1 ( 53) APSLAAALLRMHFHDCFVRGCDGSVLINS 1
Bra017761.1 ( 57) ETRMAASLIRLHFHDCFVQGCDGSLLLDS 1
Bra038345.1 ( 56) DPRNAAIIIRLHFHDCFVQGCDGSVLLDE 1
Bra024268.1 ( 64) NPANAPGILRMHFHDCFVRGCDGSILLDG 1
Bra030606.1 ( 70) RPTLAAALLRMYFHDCFVRGCDGSILLKS 1
Bra028436.1 ( 52) DPKIAPGLLRMHFHDCFVQGCDGSVLISG 1
Bra019131.1 ( 49) DPSITAALLRMQFHDCFVTGCDASLLIDP 1
Bra021488.1 ( 53) APTLGAPLLRMFFHDCFVRGCDGSVLLDS 1
Bra039137.1 ( 53) APTLGAPLLRMFFHDCFVRGCDGSVLLDS 1
Bra002271.1 ( 6) EIRMAASLIRLHFHDCFVNGCDASVLLDG 1
Bra024269.1 ( 62) NPRIAPGILRMHFHDCFVQGCDGSILITG 1
Bra034561.1 ( 51) DPTLAAGLIRMLFHDCFIEGCDASILLDS 1
Bra000228.1 ( 54) DPTISPGLLRLHFHDCFVQGCDGSVLIKG 1
Bra011438.1 ( 43) DPTLAAGLIRMLFHDCFIEGCDASILLDS 1
Bra005346.1 ( 54) DPRMAASLLRLQFHDCFVLGCDASVLLDT 1
Bra002270.1 ( 53) DVRLTAKVMRLHFHDCFVNGCDGSVLLDA 1
Bra002269.1 ( 53) DVRLTAKVMRLHFHDCFVNGCDGSVLLDA 1
Bra019132.1 ( 49) DRSITAALLRMQFHDCFVRGCDASLLIDP 1
Bra013943.1 ( 49) DRSITAALLRMQFHDCFVRGCDASLLIDP 1
Bra009105.1 ( 58) QPRTGASILRLFFHDCFVNGCDGSILLDD 1
Bra020071.1 ( 52) DVRLTAQVMRLHFHDCFVNGCDGSVLLDA 1
Bra031934.1 ( 64) NPANAPGILRMHFHDCFVRGCDGSVLLAG 1
Bra024267.1 ( 65) NPANAPGILRMHFHDCFVRGCDGSVLLAG 1
Bra013938.1 ( 53) DPNLPAILLRLHFHDCFVEGCDGSILVDN 1
Bra000113.1 ( 82) NPSLAAKLLRVHYHDCFVRGCDASLLLDS 1
Bra023149.1 ( 76) DPSLGPALLRLLFHDCGVTGCDASILLDH 1
Bra015402.1 ( 53) QTSLAAALLRVYFHDCFVRGCDGSVLLKS 1
Bra033040.1 ( 51) NPTTAAAVIRLFFHDCFPNGCDASILISS 1
Bra038526.1 ( 34) EARSVASVMRLQFHDCFVNGCDGSVLLDD 1
Bra024033.1 ( 85) RPSIAPSLIRLLFHDCFIEGCDASVLVDA 1
Bra030241.1 ( 50) EARSVASVMRLQFHDCFVNGCDASVLLDD 1
Bra008715.1 ( 59) DRTIGAPLLRMFFHDCFVRGCEGSVLLEL 1
Bra022195.1 ( 64) DPTAPAALLRLMFHDCQVQGCDASILIEP 1
Bra014895.1 ( 80) DSSLGPALLRLLFHDCGVTGCDASVLLDH 1
Bra025604.1 ( 51) TPTTAAAALRLFFHDCFPNGCDASVLVSS 1
Bra011170.1 ( 53) TFVTAPATLRLFFHDCFVRGCDASILLAS 1
Bra040175.1 ( 53) QGRTAAGILRLFFHDCFLEGCDASVLIAK 1
Bra007831.1 ( 62) DPSVLGKLLRLVFHDCFVQGCDASVLVRG 1
//
--------------------------------------------------------------------------------
--------------------------------------------------------------------------------
	Motif DPRJAAALLRLHFHDCFVRGCDGSVLLDS MEME-5 position-specific scoring matrix
--------------------------------------------------------------------------------
log-odds matrix: alength= 20 w= 29 n= 35819 bayes= 10.6166 E= 2.8e-885
-45 -672 305 152 -691 -457 -343 -603 -344 -623 -527 110 -504 97 -10 -423 -49 -583 -499 -501
-101 -493 -461 -345 -167 -195 -358 -146 -133 -462 -422 -468 394 -332 -34 -124 -14 -54 -388 -473
-47 -491 -476 -336 -592 -497 -328 -456 -78 -524 -394 -133 -503 -281 248 109 248 -179 -372 -450
-161 -352 -585 -420 -338 -479 -344 236 -428 156 240 43 -474 -379 -466 -111 80 29 -211 -283
261 -433 -724 -618 -680 96 -592 -594 -668 -225 -539 -618 80 -572 -674 -181 180 -83 -499 -620
324 -469 -764 -677 -749 -167 -637 -690 -734 -731 -616 -650 213 -613 -722 -420 -450 -567 -553 -682
203 -467 -476 -342 -616 130 -376 -31 73 -565 -458 -427 38 -49 -433 162 -379 -492 -424 -480
-199 -508 -767 -613 -468 -720 -590 171 -636 278 -282 -696 -656 -571 -669 -670 -147 78 -429 -509
-652 -624 -925 -754 -395 -843 -649 171 -774 288 246 -842 -741 -618 -763 -829 -622 -422 -377 -509
-809 -752 -831 -797 -873 -752 -604 -840 -597 -839 -814 -792 -736 -662 401 -833 -797 -907 -554 -743
-666 -636 -969 -800 -401 -869 -676 -296 -820 252 417 -878 -769 -645 -802 -869 -638 -77 -386 -520
-534 -504 -505 -450 141 -577 503 -442 -528 -11 -21 -336 -538 181 -413 -485 -459 -190 -161 101
-568 -495 -669 -574 416 -654 -367 -429 -603 -389 -392 -605 -592 -550 -637 -572 -587 -494 -139 33
-946 -862 -889 -899 -921 -797 588 -1005 -912 -950 -980 -925 -810 -859 -900 -953 -909 -1013 -651 -796
-884 -840 395 -689 -910 -777 -718 -939 -864 -920 -917 -751 -797 -813 -870 -892 -866 -951 -638 -789
-476 526 -632 -509 -595 -615 -494 -482 -590 -571 -460 -599 -599 -543 -586 -579 -472 -567 -454 -554
-526 -477 -648 -561 412 -110 -467 -418 -602 -376 -384 -620 -571 -89 -653 -547 -574 -482 -199 -175
-349 -414 -618 -497 -501 -618 -482 51 -544 -200 -339 -605 -37 -533 -571 -578 -371 356 -438 -532
-389 -567 -406 135 -583 -175 -265 -484 -48 -217 -392 225 -468 232 238 -394 9 -483 -352 -399
-734 -797 -774 -762 -886 382 -699 -897 -782 -900 -849 -764 -764 -775 -804 -785 -808 -891 -606 -763
-476 526 -632 -509 -595 -615 -494 -482 -590 -571 -460 -599 -599 -543 -586 -579 -472 -567 -454 -554
-416 -490 383 -46 -528 -450 -283 -459 -430 -522 -436 -188 -515 -372 -481 -430 -442 -476 -306 -387
255 -514 -790 -713 -783 286 -664 -732 -766 -768 -660 -690 -617 -651 -755 -467 -497 -613 -576 -710
-769 -804 -880 -881 -923 -758 -757 -971 -899 -935 -934 -896 -791 -840 -890 350 -823 -935 -651 -812
-562 -541 -865 -742 -565 -822 -795 272 -778 103 -388 -805 -781 -760 -864 -796 -536 272 -590 -626
-872 -813 -892 -877 -706 -800 -748 -624 -891 337 -565 -916 -801 -811 -880 -933 -841 -743 -591 -734
-594 -571 -892 -754 -472 -834 -723 231 -783 278 -304 -824 -768 -691 -823 -814 -567 27 -467 -568
-36 -529 340 13 -560 -411 -271 -497 38 -540 -447 -38 -481 -302 -180 -82 -161 -505 -352 -399
27 -490 57 -32 -479 103 121 -407 -61 -210 -316 81 71 -164 -282 180 -111 -402 -288 -316
--------------------------------------------------------------------------------
--------------------------------------------------------------------------------
	Motif DPRJAAALLRLHFHDCFVRGCDGSVLLDS MEME-5 position-specific probability matrix
--------------------------------------------------------------------------------
letter-probability matrix: alength= 20 w= 29 nsites= 50 E= 2.8e-885
0.060000 0.000000 0.560000 0.100000 0.000000 0.000000 0.000000 0.000000 0.000000 0.000000 0.000000 0.120000 0.000000 0.060000 0.060000 0.000000 0.040000 0.000000 0.000000 0.000000
0.040000 0.000000 0.000000 0.000000 0.020000 0.020000 0.000000 0.020000 0.020000 0.000000 0.000000 0.000000 0.660000 0.000000 0.060000 0.040000 0.060000 0.060000 0.000000 0.000000
0.060000 0.000000 0.000000 0.000000 0.000000 0.000000 0.000000 0.000000 0.020000 0.000000 0.000000 0.020000 0.000000 0.000000 0.380000 0.200000 0.300000 0.020000 0.000000 0.000000
0.020000 0.000000 0.000000 0.000000 0.000000 0.000000 0.000000 0.260000 0.000000 0.300000 0.120000 0.080000 0.000000 0.000000 0.000000 0.040000 0.100000 0.080000 0.000000 0.000000
0.500000 0.000000 0.000000 0.000000 0.000000 0.140000 0.000000 0.000000 0.000000 0.020000 0.000000 0.000000 0.080000 0.000000 0.000000 0.020000 0.200000 0.040000 0.000000 0.000000
0.780000 0.000000 0.000000 0.000000 0.000000 0.020000 0.000000 0.000000 0.000000 0.000000 0.000000 0.000000 0.200000 0.000000 0.000000 0.000000 0.000000 0.000000 0.000000 0.000000
0.340000 0.000000 0.000000 0.000000 0.000000 0.180000 0.000000 0.040000 0.080000 0.000000 0.000000 0.000000 0.060000 0.020000 0.000000 0.280000 0.000000 0.000000 0.000000 0.000000
0.020000 0.000000 0.000000 0.000000 0.000000 0.000000 0.000000 0.160000 0.000000 0.680000 0.000000 0.000000 0.000000 0.000000 0.000000 0.000000 0.020000 0.120000 0.000000 0.000000
0.000000 0.000000 0.000000 0.000000 0.000000 0.000000 0.000000 0.160000 0.000000 0.720000 0.120000 0.000000 0.000000 0.000000 0.000000 0.000000 0.000000 0.000000 0.000000 0.000000
0.000000 0.000000 0.000000 0.000000 0.000000 0.000000 0.000000 0.000000 0.000000 0.000000 0.000000 0.000000 0.000000 0.000000 1.000000 0.000000 0.000000 0.000000 0.000000 0.000000
0.000000 0.000000 0.000000 0.000000 0.000000 0.000000 0.000000 0.000000 0.000000 0.560000 0.400000 0.000000 0.000000 0.000000 0.000000 0.000000 0.000000 0.040000 0.000000 0.000000
0.000000 0.000000 0.000000 0.000000 0.160000 0.000000 0.540000 0.000000 0.000000 0.100000 0.020000 0.000000 0.000000 0.120000 0.000000 0.000000 0.000000 0.020000 0.000000 0.040000
0.000000 0.000000 0.000000 0.000000 0.980000 0.000000 0.000000 0.000000 0.000000 0.000000 0.000000 0.000000 0.000000 0.000000 0.000000 0.000000 0.000000 0.000000 0.000000 0.020000
0.000000 0.000000 0.000000 0.000000 0.000000 0.000000 1.000000 0.000000 0.000000 0.000000 0.000000 0.000000 0.000000 0.000000 0.000000 0.000000 0.000000 0.000000 0.000000 0.000000
0.000000 0.000000 1.000000 0.000000 0.000000 0.000000 0.000000 0.000000 0.000000 0.000000 0.000000 0.000000 0.000000 0.000000 0.000000 0.000000 0.000000 0.000000 0.000000 0.000000
0.000000 1.000000 0.000000 0.000000 0.000000 0.000000 0.000000 0.000000 0.000000 0.000000 0.000000 0.000000 0.000000 0.000000 0.000000 0.000000 0.000000 0.000000 0.000000 0.000000
0.000000 0.000000 0.000000 0.000000 0.940000 0.040000 0.000000 0.000000 0.000000 0.000000 0.000000 0.000000 0.000000 0.020000 0.000000 0.000000 0.000000 0.000000 0.000000 0.000000
0.000000 0.000000 0.000000 0.000000 0.000000 0.000000 0.000000 0.060000 0.000000 0.020000 0.000000 0.000000 0.040000 0.000000 0.000000 0.000000 0.000000 0.880000 0.000000 0.000000
0.000000 0.000000 0.000000 0.100000 0.000000 0.020000 0.000000 0.000000 0.020000 0.020000 0.000000 0.280000 0.000000 0.160000 0.340000 0.000000 0.060000 0.000000 0.000000 0.000000
0.000000 0.000000 0.000000 0.000000 0.000000 1.000000 0.000000 0.000000 0.000000 0.000000 0.000000 0.000000 0.000000 0.000000 0.000000 0.000000 0.000000 0.000000 0.000000 0.000000
0.000000 1.000000 0.000000 0.000000 0.000000 0.000000 0.000000 0.000000 0.000000 0.000000 0.000000 0.000000 0.000000 0.000000 0.000000 0.000000 0.000000 0.000000 0.000000 0.000000
0.000000 0.000000 0.980000 0.020000 0.000000 0.000000 0.000000 0.000000 0.000000 0.000000 0.000000 0.000000 0.000000 0.000000 0.000000 0.000000 0.000000 0.000000 0.000000 0.000000
0.480000 0.000000 0.000000 0.000000 0.000000 0.520000 0.000000 0.000000 0.000000 0.000000 0.000000 0.000000 0.000000 0.000000 0.000000 0.000000 0.000000 0.000000 0.000000 0.000000
0.000000 0.000000 0.000000 0.000000 0.000000 0.000000 0.000000 0.000000 0.000000 0.000000 0.000000 0.000000 0.000000 0.000000 0.000000 1.000000 0.000000 0.000000 0.000000 0.000000
0.000000 0.000000 0.000000 0.000000 0.000000 0.000000 0.000000 0.320000 0.000000 0.200000 0.000000 0.000000 0.000000 0.000000 0.000000 0.000000 0.000000 0.480000 0.000000 0.000000
0.000000 0.000000 0.000000 0.000000 0.000000 0.000000 0.000000 0.000000 0.000000 1.000000 0.000000 0.000000 0.000000 0.000000 0.000000 0.000000 0.000000 0.000000 0.000000 0.000000
0.000000 0.000000 0.000000 0.000000 0.000000 0.000000 0.000000 0.240000 0.000000 0.680000 0.000000 0.000000 0.000000 0.000000 0.000000 0.000000 0.000000 0.080000 0.000000 0.000000
0.080000 0.000000 0.660000 0.040000 0.000000 0.000000 0.000000 0.000000 0.080000 0.000000 0.000000 0.040000 0.000000 0.000000 0.020000 0.060000 0.020000 0.000000 0.000000 0.000000
0.100000 0.000000 0.100000 0.020000 0.000000 0.160000 0.040000 0.000000 0.020000 0.020000 0.000000 0.100000 0.080000 0.000000 0.000000 0.340000 0.020000 0.000000 0.000000 0.000000
--------------------------------------------------------------------------------
--------------------------------------------------------------------------------
	Motif DPRJAAALLRLHFHDCFVRGCDGSVLLDS MEME-5 regular expression
--------------------------------------------------------------------------------
DP[RTS][LI][AT][AP][AS]LLR[LM]HFHDCFV[RN]GCD[GA]S[VIL]L[LI]DS
--------------------------------------------------------------------------------
Time 708.70 secs.
********************************************************************************
********************************************************************************
MOTIF LYASNZSLFFKDFAKAMVKMGNIGVLTGSQGEIRRBCRAVN MEME-6	width = 41 sites = 50 llr = 3288 E-value = 1.9e-870
********************************************************************************
--------------------------------------------------------------------------------
	Motif LYASNZSLFFKDFAKAMVKMGNIGVLTGSQGEIRRBCRAVN MEME-6 Description
--------------------------------------------------------------------------------
Simplified A 1:51:121:113:616:::::1::::::12::::::::31:
pos.-specific C ::::::::::::::::::::::::::::::::::::a::::
probability D :::13:11::14:::::::::1:1:::::1:::::2:1:::
matrix E 1::1:121::11::2::1:::::::::::1:7:::::::::
F :2::::1:a4::a::::::::1:::::::::::::::::2:
G :::1:1:::::::1::::::8::3:::9::a::::::1:::
H :::::::::::::::::::::::::::::::::::::::::
I ::::::::::::::::13::::4:::::::::8::1:::1:
K 1::1::11:12:::3:::7::::2:4::11::::2:::1::
L 21:::::2:::::::::::3::1::6::::::::1::::::
M :1::::::::::::::9::7:::::::::::::::::::::
N :11231:::21::::::::::2:1::::11:1:::3:1::9
P ::::::::::::::::::::::::3::::::::::::::::
Q 2::::21:::12:::::1:::1:::::::2:1:::1:::::
R 1::1:1:1:11:::2:::2::2::::::1::::a51:311:
S 1:223:21::1::1:4::::21:1::::32:::::::3:::
T :::1:111::::::::::::::::::9:1:::::1::::1:
V :1:::::1:::::21::3::::3:6::::::12::1::33:
W :1:::::::::::::::::::::::::::::::::::::::
Y :4:::::1:1::::::::::::1::::::::::::::::::
bits 7.8
7
6.3
5.5 * *
Relative 4.7 * *
Entropy 3.9 * * * * * ** * *
(94.9 bits) 3.1 * * * *** **** **** * *
2.3 * * ** ** *** * **** **** * *
1.6 ** * ** ********** ****** ************
0.8 *****************************************
0.0 -----------------------------------------
Multilevel LYAXNQXXFFKDFAKAMIKMGNIGVLTGSQGEIRRNCRAVN
consensus S N A VRS VRLSRV PK A KD SVF
sequence D
--------------------------------------------------------------------------------
--------------------------------------------------------------------------------
	Motif LYASNZSLFFKDFAKAMVKMGNIGVLTGSQGEIRRBCRAVN MEME-6 sites sorted by position p-value
--------------------------------------------------------------------------------
Sequence name Start P-value Site
------------- ----- --------- -----------------------------------------
Bra011683.1 682 2.00e-39 SNDKSRDLVK KYAEDQEEFFEQFAESMIKMGNISPLTGSSGEIRKDCRKIN S
Bra039920.1 295 6.70e-38 SKEESSELVK KYAEDQEEFFEQFAESMIKMGNLSPLTGSSGEIRKNCRKIN S
Bra017121.1 293 1.37e-34 PRADTIPLVE QYSNNRFVFFQAFAEAMIRMGNLKPLTGTQGEIRQNCRVVN SRIRSVENED
Bra000058.1 293 1.37e-34 PQADTIPLVE QYSSNQTAFFDAFAKAMIRMGDLKPLTGNQGEIRLNCSVVN SRIMSVENED
Bra013943.1 269 2.53e-34 LDRSTRGIVS SFAQNNALFRKRFAEAMVKMGTIKVLTGRSGEIRKNCRVFN NGR
Bra036330.1 307 3.42e-34 NVGNIVELVK AYAEDESLFFEQFAKSMVNMGNIQPLTGISGEIRKNCHVIN
Bra001084.1 283 4.62e-34 THPSTSGVVF QYAANNELFKRQFAIAMVKMGSVDVLTGFAGEIRRNCRAFN
Bra006423.1 270 4.62e-34 TDRQTRGVVA RYANNNAYFKRQFVRAMIKMGAVDVLTGSAGQIRRNCRRFN
Bra018007.1 296 6.22e-34 NATDTIPLVK AYADDTQTFFNAFVEAMKRMGNIKPLTGTEGEIRLNCRVVN SNSRLHDAVE
Bra023639.1 270 1.73e-33 TDRQTRGVVA RYANNNAFFKRQFVRAMIKMGAVDVLTGRAGEIRRNCRRFN
Bra033040.1 279 1.84e-32 SDPRTRPFVD LYARDQDRFFKDFAKAMQKLSLYGVKTGRRGEIRRRCDAIN
Bra039059.1 286 1.84e-32 SDPRTRPFVD LYARDQDRFFKDFAKAMQKLSLYGVKTGRRGEIRRRCDAIN
Bra017120.1 293 2.40e-32 PGADTIPLVE LYSKNTFEFFKAFAKSMVRMGKLKPLTGTQGEVRLNCRVVN SRTRGVETED
Bra037877.1 294 8.93e-32 DASDTIPLVR AYADGQDKFFNAFVEAMKRMGSLSPLTGKQGEIRLNCRVVN SKSKIMDMVD
Bra028761.1 284 1.15e-31 NGGSTDSIVR GYSNSPSSFNSDFAAAMIKMGDISPLTGSSGEIRKVCGKTN
Bra017830.1 211 1.31e-31 TDSRSKPIVN LWASNAKLFNQDFVNSMIKLGRVGVKTGRNGNIRRDCGAFN
Bra003918.1 302 2.18e-31 VDKRTRGIVE SFAIDQRLFFDHFAVAMIKMGQMSVLTGSQGEIRSNCSARN TGSFMSVLEE
Bra009220.1 296 2.47e-31 TGSATIAIVT SFASNQSLFFQAFAQSMINMGNITPLTGNSGEIRLDCKKVN GS
Bra029933.1 291 2.47e-31 NATDTIPLVR AYADGTQTFFNAFVEAMNRMGNITPLTGTQGQIRLNCRVVN SNFLLHDIVD
Bra011771.1 286 4.07e-31 TDRRSKPTVD LWANNANLFNQAFVNSMIKLGRVGVKTGRNGNIRRDCGAFN
Bra020370.1 276 4.60e-31 NGGSTDSLVG TYSRSLNTFYRDFVRAMIKMGDIKPLTGSHGQIRRNCRRPN
Bra024269.1 288 1.08e-30 TDPATRPIVQ QLMSPRSTFNGDFARAMVRMSNIGVLTGASGEIRRVCSAVN
Bra031933.1 279 1.55e-30 SDPATRPIVQ QLMSPRSTFNAEFARAMVRMSNIGVLTGANGEIRRVCSAIN
Bra032474.1 246 3.15e-30 NPTTLSNINQ LLKGSVESFFSEFAKSMEKMGRINVKTGSAGVVRRQCSVAN S
Bra016127.1 302 7.98e-30 TDKRTRGIVE SFAIDQKLFFDHFVVGMIKMGQMSVLTGSQGEIRANCSARN TESFMSVLEE
Bra028436.1 278 1.26e-29 TNPTTRTIVQ EFLASKDSFNAQFARSMVRMSNIGVKTGANGEIRRVCSTVN
Bra008775.1 224 2.47e-29 NDFRSQATVV RFANNAEDFNSAFTSAMRKLGRVGVKVGKQGEIRKDCSAFN
Bra022090.1 287 3.09e-29 KNNSTKPFVD LYATDEKAFFEDFARAMEKMGTVGVKGDGEGEVRRRCDHFN NLNV
Bra026470.1 281 4.80e-29 YNDDSLEITQ EFDASFEDFRKSFALAMSRMGSINVLTGKAGEIRRDCRVTN ANYGA
Bra013938.1 286 5.35e-29 RRIVNSYVGL LNPLFGPSFESDFVKAMVKMGKINVKTGSNGEIRRVCSAFN
Bra035235.1 286 6.66e-29 DPTALGQVRG FAGGSLQDFFVEFGKSMEKMGRIGVKTGSDGEIRRTCSVVN
Bra024102.1 285 6.66e-29 TDQRSRATVN SFANSETAFRQAFVSAITKLGRVGVKTGNAGEIRRDCSRFN
Bra031309.1 285 1.42e-28 NSATLKMIND LVNGSEEKFYKAFAKSMEKMGRVKVKTGSAGVIRTVCSVAG S
Bra023509.1 290 2.17e-28 NKETKSYVLK QMNSQGSTFSGDFGVSMVKMGRIGVLTGKAGEVRKKCRMVN
Bra026207.1 277 2.41e-28 AGASTDSIVS EYSRNPSRFASDFGAAMIKMGDIQTLTGSAGQIRRICTAVN
Bra023862.1 288 2.67e-28 NLATLKMIND LVNGSEKKFYKAFAKSMEKMGRVKVKTGSAGVIRTRCSVAR S
Bra015404.1 285 4.06e-28 NPTTLSNINQ ILKGSVAGFFSEFAKSMEKMGRINVKTGSSGVVRKQCSVAN S
Bra037713.1 295 5.00e-28 YNEDTKQISE EFSASFEDFRKSFALSMSKMGSINVLTKNEGEIRRDCRRRN
Bra040175.1 283 6.82e-28 KDNSTRPFVE LYANDQTVFFEDFARAMEKLGMVGVKGDKDGEVRRRCDNLN KPNGSVAEPD
Bra015403.1 280 7.56e-28 DPETKSYIYT QVATAGSSFNKDFAHSMVKLGFVEILTGNKGEIRKRCAFVN
Bra008291.1 279 8.38e-28 MKQMIDSYLV TNGSSKASFATDFAKAMVKMGSIGVKIGIKGEIRRICNATN
Bra037849.1 289 8.38e-28 TDRRSRPTVD AWAKSSPAFNAAFVKAMTKLGRVGVKVGRNGNIRRDCGAFN
Bra005850.1 284 1.03e-27 NGGSTDSIVR EYSQNARVFRNDFAAAMLKMSQISPLTGSDGEIRMSCGRTN
Bra032476.1 280 3.11e-27 DWETNLYIQK QVLLNGFYFNKDFSDSMVKLGFVGVLTGDQGEIRNQCDRVN
Bra015695.1 297 8.30e-27 MKNIIESYLA SNESSEANFAADFAEAMVTMGAIGVKTGVKGEVRRICNATN
Bra032477.1 281 1.01e-26 DAETKTYIDT QVSTAGSSFNKDFSESMVKLGFVEILTGNKGEIRRKCAFVN
Bra037007.1 264 2.17e-26 NTPATRNIVN GYAFNQAKFFFDFQMAMQKMSNLDVKLGSQGDVRKNCRILN
Bra013576.1 288 2.89e-25 HDKRTRPIVK KMAKDQAYFFKEFTRAIQILSENNPLTGSKGEIRKQCNLAN KIH
Bra011475.1 358 1.69e-24 GREETEMWVR AYASDTQLFRRDFAMSMMKLSNYHVLTGPLGQVRTTCSKVL PKI
Bra017206.1 288 4.73e-24 TDPRTAPFVA KMAADNGYFHEQFSRAIRLLSETNPLTGDQGEIRKDCRYVN
--------------------------------------------------------------------------------
--------------------------------------------------------------------------------
	Motif LYASNZSLFFKDFAKAMVKMGNIGVLTGSQGEIRRBCRAVN MEME-6 block diagrams
--------------------------------------------------------------------------------
SEQUENCE NAME POSITION P-VALUE MOTIF DIAGRAM
------------- ---------------- -------------
Bra011683.1 2e-39 681_[6]_1
Bra039920.1 6.7e-38 294_[6]_1
Bra017121.1 1.4e-34 292_[6]_17
Bra000058.1 1.4e-34 292_[6]_17
Bra013943.1 2.5e-34 268_[6]_3
Bra036330.1 3.4e-34 306_[6]
Bra001084.1 4.6e-34 282_[6]
Bra006423.1 4.6e-34 269_[6]
Bra018007.1 6.2e-34 295_[6]_17
Bra023639.1 1.7e-33 269_[6]
Bra033040.1 1.8e-32 278_[6]
Bra039059.1 1.8e-32 285_[6]
Bra017120.1 2.4e-32 292_[6]_17
Bra037877.1 8.9e-32 293_[6]_18
Bra028761.1 1.2e-31 283_[6]
Bra017830.1 1.3e-31 210_[6]
Bra003918.1 2.2e-31 301_[6]_20
Bra009220.1 2.5e-31 295_[6]_2
Bra029933.1 2.5e-31 290_[6]_18
Bra011771.1 4.1e-31 285_[6]
Bra020370.1 4.6e-31 275_[6]
Bra024269.1 1.1e-30 287_[6]
Bra031933.1 1.5e-30 278_[6]
Bra032474.1 3.2e-30 245_[6]_1
Bra016127.1 8e-30 301_[6]_20
Bra028436.1 1.3e-29 277_[6]
Bra008775.1 2.5e-29 223_[6]
Bra022090.1 3.1e-29 286_[6]_4
Bra026470.1 4.8e-29 280_[6]_5
Bra013938.1 5.4e-29 285_[6]
Bra035235.1 6.7e-29 285_[6]
Bra024102.1 6.7e-29 284_[6]
Bra031309.1 1.4e-28 284_[6]_1
Bra023509.1 2.2e-28 289_[6]
Bra026207.1 2.4e-28 276_[6]
Bra023862.1 2.7e-28 287_[6]_1
Bra015404.1 4.1e-28 284_[6]_1
Bra037713.1 5e-28 294_[6]
Bra040175.1 6.8e-28 282_[6]_24
Bra015403.1 7.6e-28 279_[6]
Bra008291.1 8.4e-28 278_[6]
Bra037849.1 8.4e-28 288_[6]
Bra005850.1 1e-27 283_[6]
Bra032476.1 3.1e-27 279_[6]
Bra015695.1 8.3e-27 296_[6]
Bra032477.1 1e-26 280_[6]
Bra037007.1 2.2e-26 263_[6]
Bra013576.1 2.9e-25 287_[6]_3
Bra011475.1 1.7e-24 357_[6]_3
Bra017206.1 4.7e-24 287_[6]
--------------------------------------------------------------------------------
--------------------------------------------------------------------------------
	Motif LYASNZSLFFKDFAKAMVKMGNIGVLTGSQGEIRRBCRAVN MEME-6 in BLOCKS format
--------------------------------------------------------------------------------
BL MOTIF LYASNZSLFFKDFAKAMVKMGNIGVLTGSQGEIRRBCRAVN width=41 seqs=50
Bra011683.1 ( 682) KYAEDQEEFFEQFAESMIKMGNISPLTGSSGEIRKDCRKIN 1
Bra039920.1 ( 295) KYAEDQEEFFEQFAESMIKMGNLSPLTGSSGEIRKNCRKIN 1
Bra017121.1 ( 293) QYSNNRFVFFQAFAEAMIRMGNLKPLTGTQGEIRQNCRVVN 1
Bra000058.1 ( 293) QYSSNQTAFFDAFAKAMIRMGDLKPLTGNQGEIRLNCSVVN 1
Bra013943.1 ( 269) SFAQNNALFRKRFAEAMVKMGTIKVLTGRSGEIRKNCRVFN 1
Bra036330.1 ( 307) AYAEDESLFFEQFAKSMVNMGNIQPLTGISGEIRKNCHVIN 1
Bra001084.1 ( 283) QYAANNELFKRQFAIAMVKMGSVDVLTGFAGEIRRNCRAFN 1
Bra006423.1 ( 270) RYANNNAYFKRQFVRAMIKMGAVDVLTGSAGQIRRNCRRFN 1
Bra018007.1 ( 296) AYADDTQTFFNAFVEAMKRMGNIKPLTGTEGEIRLNCRVVN 1
Bra023639.1 ( 270) RYANNNAFFKRQFVRAMIKMGAVDVLTGRAGEIRRNCRRFN 1
Bra033040.1 ( 279) LYARDQDRFFKDFAKAMQKLSLYGVKTGRRGEIRRRCDAIN 1
Bra039059.1 ( 286) LYARDQDRFFKDFAKAMQKLSLYGVKTGRRGEIRRRCDAIN 1
Bra017120.1 ( 293) LYSKNTFEFFKAFAKSMVRMGKLKPLTGTQGEVRLNCRVVN 1
Bra037877.1 ( 294) AYADGQDKFFNAFVEAMKRMGSLSPLTGKQGEIRLNCRVVN 1
Bra028761.1 ( 284) GYSNSPSSFNSDFAAAMIKMGDISPLTGSSGEIRKVCGKTN 1
Bra017830.1 ( 211) LWASNAKLFNQDFVNSMIKLGRVGVKTGRNGNIRRDCGAFN 1
Bra003918.1 ( 302) SFAIDQRLFFDHFAVAMIKMGQMSVLTGSQGEIRSNCSARN 1
Bra009220.1 ( 296) SFASNQSLFFQAFAQSMINMGNITPLTGNSGEIRLDCKKVN 1
Bra029933.1 ( 291) AYADGTQTFFNAFVEAMNRMGNITPLTGTQGQIRLNCRVVN 1
Bra011771.1 ( 286) LWANNANLFNQAFVNSMIKLGRVGVKTGRNGNIRRDCGAFN 1
Bra020370.1 ( 276) TYSRSLNTFYRDFVRAMIKMGDIKPLTGSHGQIRRNCRRPN 1
Bra024269.1 ( 288) QLMSPRSTFNGDFARAMVRMSNIGVLTGASGEIRRVCSAVN 1
Bra031933.1 ( 279) QLMSPRSTFNAEFARAMVRMSNIGVLTGANGEIRRVCSAIN 1
Bra032474.1 ( 246) LLKGSVESFFSEFAKSMEKMGRINVKTGSAGVVRRQCSVAN 1
Bra016127.1 ( 302) SFAIDQKLFFDHFVVGMIKMGQMSVLTGSQGEIRANCSARN 1
Bra028436.1 ( 278) EFLASKDSFNAQFARSMVRMSNIGVKTGANGEIRRVCSTVN 1
Bra008775.1 ( 224) RFANNAEDFNSAFTSAMRKLGRVGVKVGKQGEIRKDCSAFN 1
Bra022090.1 ( 287) LYATDEKAFFEDFARAMEKMGTVGVKGDGEGEVRRRCDHFN 1
Bra026470.1 ( 281) EFDASFEDFRKSFALAMSRMGSINVLTGKAGEIRRDCRVTN 1
Bra013938.1 ( 286) LNPLFGPSFESDFVKAMVKMGKINVKTGSNGEIRRVCSAFN 1
Bra035235.1 ( 286) FAGGSLQDFFVEFGKSMEKMGRIGVKTGSDGEIRRTCSVVN 1
Bra024102.1 ( 285) SFANSETAFRQAFVSAITKLGRVGVKTGNAGEIRRDCSRFN 1
Bra031309.1 ( 285) LVNGSEEKFYKAFAKSMEKMGRVKVKTGSAGVIRTVCSVAG 1
Bra023509.1 ( 290) QMNSQGSTFSGDFGVSMVKMGRIGVLTGKAGEVRKKCRMVN 1
Bra026207.1 ( 277) EYSRNPSRFASDFGAAMIKMGDIQTLTGSAGQIRRICTAVN 1
Bra023862.1 ( 288) LVNGSEKKFYKAFAKSMEKMGRVKVKTGSAGVIRTRCSVAR 1
Bra015404.1 ( 285) ILKGSVAGFFSEFAKSMEKMGRINVKTGSSGVVRKQCSVAN 1
Bra037713.1 ( 295) EFSASFEDFRKSFALSMSKMGSINVLTKNEGEIRRDCRRRN 1
Bra040175.1 ( 283) LYANDQTVFFEDFARAMEKLGMVGVKGDKDGEVRRRCDNLN 1
Bra015403.1 ( 280) QVATAGSSFNKDFAHSMVKLGFVEILTGNKGEIRKRCAFVN 1
Bra008291.1 ( 279) TNGSSKASFATDFAKAMVKMGSIGVKIGIKGEIRRICNATN 1
Bra037849.1 ( 289) AWAKSSPAFNAAFVKAMTKLGRVGVKVGRNGNIRRDCGAFN 1
Bra005850.1 ( 284) EYSQNARVFRNDFAAAMLKMSQISPLTGSDGEIRMSCGRTN 1
Bra032476.1 ( 280) QVLLNGFYFNKDFSDSMVKLGFVGVLTGDQGEIRNQCDRVN 1
Bra015695.1 ( 297) SNESSEANFAADFAEAMVTMGAIGVKTGVKGEVRRICNATN 1
Bra032477.1 ( 281) QVSTAGSSFNKDFSESMVKLGFVEILTGNKGEIRRKCAFVN 1
Bra037007.1 ( 264) GYAFNQAKFFFDFQMAMQKMSNLDVKLGSQGDVRKNCRILN 1
Bra013576.1 ( 288) KMAKDQAYFFKEFTRAIQILSENNPLTGSKGEIRKQCNLAN 1
Bra011475.1 ( 358) AYASDTQLFRRDFAMSMMKLSNYHVLTGPLGQVRTTCSKVL 1
Bra017206.1 ( 288) KMAADNGYFHEQFSRAIRLLSETNPLTGDQGEIRKDCRYVN 1
//
--------------------------------------------------------------------------------
--------------------------------------------------------------------------------
	Motif LYASNZSLFFKDFAKAMVKMGNIGVLTGSQGEIRRBCRAVN MEME-6 position-specific scoring matrix
--------------------------------------------------------------------------------
log-odds matrix: alength= 20 w= 41 n= 34403 bayes= 10.5583 E= 1.9e-870
51 -474 -293 138 -145 -83 -189 -123 81 101 -294 -264 -359 244 -1 39 -35 -380 -269 -299
-169 -315 -388 -268 169 -408 -20 -264 -308 -56 103 -32 -363 -290 -348 -313 -312 6 331 437
282 -254 -183 -86 -426 -94 -271 -337 -47 -151 48 -28 -150 -245 -343 68 -263 -249 -243 -338
27 -475 -10 78 -145 37 -188 -36 48 -126 -295 142 -359 57 34 92 13 -382 -269 -299
-101 -637 198 -330 -145 -75 -318 -705 -403 -720 -646 243 -19 -53 -532 162 -433 -698 -522 -494
0 -475 -293 161 -53 37 -188 -387 6 -126 -295 79 -23 283 -1 -157 49 -87 -269 -299
88 -475 26 198 2 -165 -188 -387 81 -404 -295 -34 -23 138 -48 92 13 -382 -269 -299
0 -475 26 78 -145 -165 -188 -386 81 73 -295 -108 -359 -146 -1 59 101 -34 -269 169
-892 -813 -874 -864 424 -790 -695 -846 -879 -802 -812 -889 -794 -825 -876 -900 -871 -891 -530 -540
-39 -514 -326 -43 282 -405 34 -430 49 -446 -340 189 -404 -183 91 -170 -301 -427 -307 133
0 -475 -10 161 -145 -83 -188 -387 220 -404 -295 50 -359 166 63 39 -107 -169 -269 -299
159 -682 248 160 -673 -486 118 -560 -310 -579 -477 -368 -482 232 -155 -110 -418 -538 -478 -492
-892 -813 -874 -864 424 -790 -695 -846 -879 -802 -812 -889 -794 -825 -876 -900 -871 -891 -530 -540
288 -309 -573 -445 -528 -34 -459 -439 -489 -484 -379 -519 -529 -79 -529 -51 -56 151 -348 -479
-35 -475 -133 213 -461 -373 36 -124 231 -126 79 -34 -359 -11 155 -91 -257 -35 -269 -299
286 -454 -754 -664 -737 -165 -627 -676 -722 -718 -601 -636 -567 -599 -710 208 -435 -552 -545 -672
-506 -451 -604 -519 -460 -577 -464 -76 -512 -260 543 -567 -541 -487 -606 -551 -471 -368 -209 -328
-288 -425 -340 178 -411 -400 -223 238 -5 -188 -2 -119 -387 135 -54 -97 -36 181 -249 -295
-483 -560 -599 -385 -685 -557 -329 -151 389 -245 -449 -71 -545 -278 148 -522 -164 -553 -364 -476
-678 -647 -966 -808 -409 -862 -677 -310 -826 157 502 -883 -771 -651 -807 -873 -651 -448 -392 -524
-464 -594 -692 -662 -798 349 -628 -762 -696 -798 -696 -643 -657 -661 -720 114 -576 -683 -552 -690
-35 -475 26 35 2 -373 -188 -387 6 -126 -11 197 -359 103 168 16 -35 -382 -269 -299
-350 -381 -489 -384 -334 -489 -378 350 -383 6 49 -210 -472 -374 -460 -419 -172 162 -228 59
-408 -580 36 18 -599 218 32 -549 168 -566 -465 135 -470 44 -410 64 -43 -544 -412 -418
-541 -531 -852 -731 -599 -782 -795 7 -768 -434 -418 -788 269 -765 -858 -749 -143 313 -632 -637
-804 -792 -863 -760 -683 -778 -664 -601 296 267 -544 -820 -783 -656 -651 -853 -775 -710 -564 -677
-423 -439 -577 -513 -545 -100 -462 -102 -475 -221 -352 -414 -550 -432 -532 -263 391 -75 -391 -506
-317 -481 -115 -362 -579 369 -366 -519 -163 -593 -454 -351 -477 -417 -434 -379 -447 -508 -303 -437
-35 -474 -59 -136 -145 -165 -188 -36 107 -404 -295 103 -109 -146 107 179 49 -169 -269 -299
118 -476 -10 78 -462 -373 36 -388 108 -207 -296 103 -359 271 -48 76 -258 -383 -270 -300
-734 -797 -774 -762 -886 382 -699 -897 -782 -900 -849 -764 -764 -775 -804 -785 -808 -891 -606 -763
-438 -874 -116 421 -817 -561 -442 -617 -359 -638 -540 7 -513 168 -543 -520 -490 7 -611 -612
-553 -534 -842 -726 -594 -807 -795 405 -758 -422 -408 -786 -774 -762 -854 -777 -526 138 -625 -630
-809 -752 -831 -797 -873 -752 -604 -840 -597 -839 -814 -792 -736 -662 401 -833 -797 -907 -554 -743
-186 -600 -499 -305 -637 -523 -293 -513 231 24 -13 -133 -519 -31 289 -198 8 -517 -376 -438
-292 -490 150 -154 -479 -386 -203 20 6 -419 -312 239 -377 138 88 -163 -37 60 -285 -316
-476 526 -632 -509 -595 -615 -494 -482 -590 -571 -460 -599 -599 -543 -586 -579 -472 -567 -454 -554
-96 -580 65 -255 -600 46 32 -549 -96 -565 -465 26 -471 -280 236 169 -128 -544 -411 -418
177 -357 -532 -369 -38 -468 22 -66 94 -157 13 -142 -461 -343 105 -400 -115 189 -213 -7
28 -353 -586 -421 194 -479 -344 133 -428 -92 -189 -471 -118 -379 -14 -415 80 216 -211 -283
-416 -400 -277 -371 -444 -264 -77 -334 -319 -316 -348 401 -406 -257 -256 -247 -284 -419 -198 -322
--------------------------------------------------------------------------------
--------------------------------------------------------------------------------
	Motif LYASNZSLFFKDFAKAMVKMGNIGVLTGSQGEIRRBCRAVN MEME-6 position-specific probability matrix
--------------------------------------------------------------------------------
letter-probability matrix: alength= 20 w= 41 nsites= 50 E= 1.9e-870
0.120000 0.000000 0.000000 0.100000 0.020000 0.040000 0.000000 0.020000 0.080000 0.220000 0.000000 0.000000 0.000000 0.180000 0.060000 0.120000 0.040000 0.000000 0.000000 0.000000
0.020000 0.000000 0.000000 0.000000 0.180000 0.000000 0.000000 0.000000 0.000000 0.080000 0.060000 0.060000 0.000000 0.000000 0.000000 0.000000 0.000000 0.100000 0.060000 0.440000
0.540000 0.000000 0.020000 0.020000 0.000000 0.040000 0.000000 0.000000 0.040000 0.040000 0.040000 0.060000 0.020000 0.000000 0.000000 0.180000 0.000000 0.000000 0.000000 0.000000
0.100000 0.000000 0.060000 0.060000 0.020000 0.100000 0.000000 0.040000 0.060000 0.040000 0.000000 0.160000 0.000000 0.040000 0.080000 0.180000 0.060000 0.000000 0.000000 0.000000
0.040000 0.000000 0.260000 0.000000 0.020000 0.040000 0.000000 0.000000 0.000000 0.000000 0.000000 0.300000 0.040000 0.020000 0.000000 0.280000 0.000000 0.000000 0.000000 0.000000
0.080000 0.000000 0.000000 0.120000 0.040000 0.100000 0.000000 0.000000 0.040000 0.040000 0.000000 0.100000 0.040000 0.240000 0.060000 0.020000 0.080000 0.040000 0.000000 0.000000
0.160000 0.000000 0.080000 0.160000 0.060000 0.020000 0.000000 0.000000 0.080000 0.000000 0.000000 0.040000 0.040000 0.080000 0.040000 0.180000 0.060000 0.000000 0.000000 0.000000
0.080000 0.000000 0.080000 0.060000 0.020000 0.020000 0.000000 0.000000 0.080000 0.180000 0.000000 0.020000 0.000000 0.000000 0.060000 0.140000 0.120000 0.060000 0.000000 0.080000
0.000000 0.000000 0.000000 0.000000 1.000000 0.000000 0.000000 0.000000 0.000000 0.000000 0.000000 0.000000 0.000000 0.000000 0.000000 0.000000 0.000000 0.000000 0.000000 0.000000
0.060000 0.000000 0.000000 0.020000 0.420000 0.000000 0.020000 0.000000 0.060000 0.000000 0.000000 0.220000 0.000000 0.000000 0.120000 0.020000 0.000000 0.000000 0.000000 0.060000
0.080000 0.000000 0.060000 0.120000 0.020000 0.040000 0.000000 0.000000 0.240000 0.000000 0.000000 0.080000 0.000000 0.100000 0.100000 0.120000 0.020000 0.020000 0.000000 0.000000
0.260000 0.000000 0.380000 0.100000 0.000000 0.000000 0.040000 0.000000 0.000000 0.000000 0.000000 0.000000 0.000000 0.160000 0.020000 0.040000 0.000000 0.000000 0.000000 0.000000
0.000000 0.000000 0.000000 0.000000 1.000000 0.000000 0.000000 0.000000 0.000000 0.000000 0.000000 0.000000 0.000000 0.000000 0.000000 0.000000 0.000000 0.000000 0.000000 0.000000
0.580000 0.000000 0.000000 0.000000 0.000000 0.060000 0.000000 0.000000 0.000000 0.000000 0.000000 0.000000 0.000000 0.020000 0.000000 0.060000 0.040000 0.240000 0.000000 0.000000
0.060000 0.000000 0.020000 0.180000 0.000000 0.000000 0.020000 0.020000 0.260000 0.040000 0.040000 0.040000 0.000000 0.020000 0.200000 0.040000 0.000000 0.060000 0.000000 0.000000
0.600000 0.000000 0.000000 0.000000 0.000000 0.020000 0.000000 0.000000 0.000000 0.000000 0.000000 0.000000 0.000000 0.000000 0.000000 0.380000 0.000000 0.000000 0.000000 0.000000
0.000000 0.000000 0.000000 0.000000 0.000000 0.000000 0.000000 0.060000 0.000000 0.000000 0.940000 0.000000 0.000000 0.000000 0.000000 0.000000 0.000000 0.000000 0.000000 0.000000
0.000000 0.000000 0.000000 0.140000 0.000000 0.000000 0.000000 0.280000 0.040000 0.020000 0.020000 0.020000 0.000000 0.080000 0.040000 0.040000 0.040000 0.280000 0.000000 0.000000
0.000000 0.000000 0.000000 0.000000 0.000000 0.000000 0.000000 0.020000 0.700000 0.020000 0.000000 0.040000 0.000000 0.000000 0.200000 0.000000 0.020000 0.000000 0.000000 0.000000
0.000000 0.000000 0.000000 0.000000 0.000000 0.000000 0.000000 0.000000 0.000000 0.280000 0.720000 0.000000 0.000000 0.000000 0.000000 0.000000 0.000000 0.000000 0.000000 0.000000
0.000000 0.000000 0.000000 0.000000 0.000000 0.800000 0.000000 0.000000 0.000000 0.000000 0.000000 0.000000 0.000000 0.000000 0.000000 0.200000 0.000000 0.000000 0.000000 0.000000
0.060000 0.000000 0.080000 0.040000 0.060000 0.000000 0.000000 0.000000 0.040000 0.040000 0.020000 0.240000 0.000000 0.060000 0.220000 0.100000 0.040000 0.000000 0.000000 0.000000
0.000000 0.000000 0.000000 0.000000 0.000000 0.000000 0.000000 0.440000 0.000000 0.120000 0.040000 0.020000 0.000000 0.000000 0.000000 0.000000 0.020000 0.300000 0.000000 0.060000
0.000000 0.000000 0.080000 0.040000 0.000000 0.340000 0.020000 0.000000 0.160000 0.000000 0.000000 0.140000 0.000000 0.040000 0.000000 0.140000 0.040000 0.000000 0.000000 0.000000
0.000000 0.000000 0.000000 0.000000 0.000000 0.000000 0.000000 0.040000 0.000000 0.000000 0.000000 0.000000 0.300000 0.000000 0.000000 0.000000 0.020000 0.640000 0.000000 0.000000
0.000000 0.000000 0.000000 0.000000 0.000000 0.000000 0.000000 0.000000 0.380000 0.620000 0.000000 0.000000 0.000000 0.000000 0.000000 0.000000 0.000000 0.000000 0.000000 0.000000
0.000000 0.000000 0.000000 0.000000 0.000000 0.040000 0.000000 0.020000 0.000000 0.020000 0.000000 0.000000 0.000000 0.000000 0.000000 0.000000 0.880000 0.040000 0.000000 0.000000
0.000000 0.000000 0.040000 0.000000 0.000000 0.940000 0.000000 0.000000 0.020000 0.000000 0.000000 0.000000 0.000000 0.000000 0.000000 0.000000 0.000000 0.000000 0.000000 0.000000
0.060000 0.000000 0.040000 0.000000 0.020000 0.020000 0.000000 0.040000 0.100000 0.000000 0.000000 0.120000 0.020000 0.000000 0.140000 0.340000 0.080000 0.020000 0.000000 0.000000
0.200000 0.000000 0.060000 0.060000 0.000000 0.000000 0.020000 0.000000 0.100000 0.020000 0.000000 0.120000 0.000000 0.220000 0.040000 0.160000 0.000000 0.000000 0.000000 0.000000
0.000000 0.000000 0.000000 0.000000 0.000000 1.000000 0.000000 0.000000 0.000000 0.000000 0.000000 0.000000 0.000000 0.000000 0.000000 0.000000 0.000000 0.000000 0.000000 0.000000
0.000000 0.000000 0.020000 0.740000 0.000000 0.000000 0.000000 0.000000 0.000000 0.000000 0.000000 0.060000 0.000000 0.100000 0.000000 0.000000 0.000000 0.080000 0.000000 0.000000
0.000000 0.000000 0.000000 0.000000 0.000000 0.000000 0.000000 0.820000 0.000000 0.000000 0.000000 0.000000 0.000000 0.000000 0.000000 0.000000 0.000000 0.180000 0.000000 0.000000
0.000000 0.000000 0.000000 0.000000 0.000000 0.000000 0.000000 0.000000 0.000000 0.000000 0.000000 0.000000 0.000000 0.000000 1.000000 0.000000 0.000000 0.000000 0.000000 0.000000
0.020000 0.000000 0.000000 0.000000 0.000000 0.000000 0.000000 0.000000 0.240000 0.120000 0.020000 0.020000 0.000000 0.020000 0.480000 0.020000 0.060000 0.000000 0.000000 0.000000
0.000000 0.000000 0.200000 0.000000 0.000000 0.000000 0.000000 0.060000 0.040000 0.000000 0.000000 0.320000 0.000000 0.080000 0.120000 0.020000 0.040000 0.120000 0.000000 0.000000
0.000000 1.000000 0.000000 0.000000 0.000000 0.000000 0.000000 0.000000 0.000000 0.000000 0.000000 0.000000 0.000000 0.000000 0.000000 0.000000 0.000000 0.000000 0.000000 0.000000
0.040000 0.000000 0.100000 0.000000 0.000000 0.100000 0.020000 0.000000 0.020000 0.000000 0.000000 0.060000 0.000000 0.000000 0.340000 0.300000 0.020000 0.000000 0.000000 0.000000
0.300000 0.000000 0.000000 0.000000 0.040000 0.000000 0.020000 0.020000 0.100000 0.020000 0.020000 0.020000 0.000000 0.000000 0.140000 0.000000 0.020000 0.280000 0.000000 0.020000
0.100000 0.000000 0.000000 0.000000 0.220000 0.000000 0.000000 0.120000 0.000000 0.040000 0.000000 0.000000 0.020000 0.000000 0.060000 0.000000 0.100000 0.340000 0.000000 0.000000
0.000000 0.000000 0.000000 0.000000 0.000000 0.020000 0.000000 0.000000 0.000000 0.020000 0.000000 0.940000 0.000000 0.000000 0.020000 0.000000 0.000000 0.000000 0.000000 0.000000
--------------------------------------------------------------------------------
--------------------------------------------------------------------------------
	Motif LYASNZSLFFKDFAKAMVKMGNIGVLTGSQGEIRRBCRAVN MEME-6 regular expression
--------------------------------------------------------------------------------
LYAX[NSD]QXXF[FN]K[DA]F[AV][KR][AS]M[IV][KR][ML][GS][NR][IV]G[VP][LK]TGS[QA]GEIR[RK][ND]C[RS][AV][VF]N
--------------------------------------------------------------------------------
Time 811.41 secs.
********************************************************************************
********************************************************************************
MOTIF TPNKFDNSYFKNLQQGKGLLTSDQVLFSD MEME-7	width = 29 sites = 50 llr = 2675 E-value = 2.3e-718
********************************************************************************
--------------------------------------------------------------------------------
	Motif TPNKFDNSYFKNLQQGKGLLTSDQVLFSD MEME-7 Description
--------------------------------------------------------------------------------
Simplified A :111:::1::::::1:::::1::::::::
pos.-specific C :::::::::::::::::::::::::::::
probability D ::2::a:::::1::1:::::::a:1:::5
matrix E ::::::::::::::1:::::2:::2::::
F ::::a::::5:::::::::1::::::6::
G ::1::::::::::::5:a::::::1:::1
H ::::::::::::::::::::1::1:::::
I ::::::::::::11:::::1::::1::::
K :::3:::1::4::1114::::::::::1:
L ::::::::::::91::1:87:::::a:::
M :::::::1:::::2::1::::::::::::
N ::2:::81::18::121:::1::::::1:
P :8:::::::::::1:::::::::::::::
Q :::1:::1::1::221::::2::8:::::
R ::11::::::1::2112::::::::::::
S 4::1:::2::::::1:::::19:::::52
T 6:11::1:::1:::::::::31:::::21
V ::12:::1::1::1::::1:::::3::::
W ::::::::::::::::::::::::::1::
Y ::::::::a4::::::::::::::::1::
bits 7.8
7
6.3
5.5 *
Relative 4.7 * *
Entropy 3.9 ** ** * **
(77.2 bits) 3.1 ** *** ** ** * *** **
2.3 ** *** ** ** * *** *** **
1.6 ** *********** **************
0.8 *****************************
0.0 -----------------------------
Multilevel TPDKFDNSYFKNLQXGKGLLTSDQVLFSD
consensus S NV Y NR Q E TS
sequence
--------------------------------------------------------------------------------
--------------------------------------------------------------------------------
	Motif TPNKFDNSYFKNLQQGKGLLTSDQVLFSD MEME-7 sites sorted by position p-value
--------------------------------------------------------------------------------
Sequence name Start P-value Site
------------- ----- --------- -----------------------------
Bra024102.1 248 4.15e-29 PRIAINMDPT TPRTFDNAYFKNLQQGKGLFTSDQVLFTD QRSRATVNSF
Bra011771.1 249 1.17e-28 PRVAINMDPT TPRQFDNVYYKNLQQGKGLFTSDQDLFTD RRSKPTVDLW
[truncated: 1,323 more rows]
