# Supplementary material for: Genome-Wide Identification and Analysis of the Ascorbate Peroxidase (APX) Gene Family of Winter Rapeseed (Brassica rapa L.) Under Abiotic Stress
Source: Front Genet. 2022 Jan 21;12:753624. doi: 10.3389/fgene.2021.753624 (PMC8814366; doi:10.3389/fgene.2021.753624)
Supplement: Supplementary file 6 [file Table6.XLSX]

## Sheet: string_interactions
Table S6 Predicting interactions between BrAPXs using STRING software.
#node1	node2	node1_string_id	node2_string_id	neighborhood_on_chromosome	gene_fusion	phylogenetic_cooccurrence	homology	coexpression	experimentally_determined_interaction	database_annotated	automated_textmining	combined_score
Bra000236.1-P	Bra006769.1-P	3711.Bra000236.1-P	3711.Bra006769.1-P	0	0	0	0	0	0	0	0.691	0.691
Bra002269.1-P	Bra003119.1-P	3711.Bra002269.1-P	3711.Bra003119.1-P	0	0	0	0	0	0.05	0	0.534	0.538
Bra002269.1-P	Bra011510.1-P	3711.Bra002269.1-P	3711.Bra011510.1-P	0	0	0	0	0	0	0.65	0	0.65
Bra002269.1-P	Bra017639.1-P	3711.Bra002269.1-P	3711.Bra017639.1-P	0	0	0	0	0	0	0.65	0	0.65
Bra002269.1-P	Bra016041.1-P	3711.Bra002269.1-P	3711.Bra016041.1-P	0	0	0	0	0	0	0.65	0	0.65
Bra002269.1-P	Bra022425.1-P	3711.Bra002269.1-P	3711.Bra022425.1-P	0	0	0	0	0	0	0.65	0	0.65
Bra003119.1-P	Bra002269.1-P	3711.Bra003119.1-P	3711.Bra002269.1-P	0	0	0	0	0	0.05	0	0.534	0.538
Bra003119.1-P	Bra017120.1-P	3711.Bra003119.1-P	3711.Bra017120.1-P	0	0	0	0	0	0.05	0	0.534	0.538
Bra003119.1-P	Bra026822.1-P	3711.Bra003119.1-P	3711.Bra026822.1-P	0	0	0	0	0	0.05	0	0.712	0.714
Bra003918.1-P	Bra017639.1-P	3711.Bra003918.1-P	3711.Bra017639.1-P	0	0	0	0	0	0	0.65	0	0.65
Bra003918.1-P	Bra011510.1-P	3711.Bra003918.1-P	3711.Bra011510.1-P	0	0	0	0	0	0	0.65	0	0.65
Bra003918.1-P	Bra022425.1-P	3711.Bra003918.1-P	3711.Bra022425.1-P	0	0	0	0	0	0	0.65	0	0.65
Bra003918.1-P	Bra016041.1-P	3711.Bra003918.1-P	3711.Bra016041.1-P	0	0	0	0	0	0	0.65	0	0.65
Bra004121.1-P	Bra035235.1-P	3711.Bra004121.1-P	3711.Bra035235.1-P	0	0	0	0	0.056	0	0	0.711	0.715
Bra004121.1-P	Bra014765.1-P	3711.Bra004121.1-P	3711.Bra014765.1-P	0	0	0.448	0.942	0	0	0.8	0.999	0.816
Bra006769.1-P	Bra000236.1-P	3711.Bra006769.1-P	3711.Bra000236.1-P	0	0	0	0	0	0	0	0.691	0.691
Bra006769.1-P	Bra017639.1-P	3711.Bra006769.1-P	3711.Bra017639.1-P	0	0	0	0	0	0	0.65	0	0.65
Bra006769.1-P	Bra011510.1-P	3711.Bra006769.1-P	3711.Bra011510.1-P	0	0	0	0	0	0	0.65	0	0.65
Bra006769.1-P	Bra016041.1-P	3711.Bra006769.1-P	3711.Bra016041.1-P	0	0	0	0	0	0	0.65	0	0.65
Bra006769.1-P	Bra022425.1-P	3711.Bra006769.1-P	3711.Bra022425.1-P	0	0	0	0	0	0	0.65	0	0.65
Bra011510.1-P	Bra002269.1-P	3711.Bra011510.1-P	3711.Bra002269.1-P	0	0	0	0	0	0	0.65	0	0.65
Bra011510.1-P	Bra003918.1-P	3711.Bra011510.1-P	3711.Bra003918.1-P	0	0	0	0	0	0	0.65	0	0.65
Bra011510.1-P	Bra006769.1-P	3711.Bra011510.1-P	3711.Bra006769.1-P	0	0	0	0	0	0	0.65	0	0.65
Bra011510.1-P	Bra017120.1-P	3711.Bra011510.1-P	3711.Bra017120.1-P	0	0	0	0	0	0	0.65	0	0.65
Bra011510.1-P	Bra033040.1-P	3711.Bra011510.1-P	3711.Bra033040.1-P	0	0	0	0	0	0	0.65	0	0.65
Bra011510.1-P	Bra026822.1-P	3711.Bra011510.1-P	3711.Bra026822.1-P	0	0	0	0	0	0	0.65	0	0.65
Bra011510.1-P	Bra015403.1-P	3711.Bra011510.1-P	3711.Bra015403.1-P	0	0	0	0	0	0	0.65	0	0.65
Bra011510.1-P	Bra031934.1-P	3711.Bra011510.1-P	3711.Bra031934.1-P	0	0	0	0	0	0	0.65	0.093	0.668
Bra011510.1-P	Bra035235.1-P	3711.Bra011510.1-P	3711.Bra035235.1-P	0	0	0	0	0	0	0.65	0.127	0.681
Bra014765.1-P	Bra004121.1-P	3711.Bra014765.1-P	3711.Bra004121.1-P	0	0	0.448	0.942	0	0	0.8	0.999	0.816
Bra014765.1-P	Bra035235.1-P	3711.Bra014765.1-P	3711.Bra035235.1-P	0	0	0	0	0.056	0	0	0.71	0.714
Bra015403.1-P	Bra011510.1-P	3711.Bra015403.1-P	3711.Bra011510.1-P	0	0	0	0	0	0	0.65	0	0.65
Bra015403.1-P	Bra017639.1-P	3711.Bra015403.1-P	3711.Bra017639.1-P	0	0	0	0	0	0	0.65	0	0.65
Bra015403.1-P	Bra016041.1-P	3711.Bra015403.1-P	3711.Bra016041.1-P	0	0	0	0	0	0	0.65	0	0.65
Bra015403.1-P	Bra022425.1-P	3711.Bra015403.1-P	3711.Bra022425.1-P	0	0	0	0	0	0	0.65	0	0.65
Bra016041.1-P	Bra002269.1-P	3711.Bra016041.1-P	3711.Bra002269.1-P	0	0	0	0	0	0	0.65	0	0.65
Bra016041.1-P	Bra003918.1-P	3711.Bra016041.1-P	3711.Bra003918.1-P	0	0	0	0	0	0	0.65	0	0.65
Bra016041.1-P	Bra006769.1-P	3711.Bra016041.1-P	3711.Bra006769.1-P	0	0	0	0	0	0	0.65	0	0.65
Bra016041.1-P	Bra015403.1-P	3711.Bra016041.1-P	3711.Bra015403.1-P	0	0	0	0	0	0	0.65	0	0.65
Bra016041.1-P	Bra026822.1-P	3711.Bra016041.1-P	3711.Bra026822.1-P	0	0	0	0	0	0	0.65	0	0.65
Bra016041.1-P	Bra033040.1-P	3711.Bra016041.1-P	3711.Bra033040.1-P	0	0	0	0	0	0	0.65	0	0.65
Bra016041.1-P	Bra017120.1-P	3711.Bra016041.1-P	3711.Bra017120.1-P	0	0	0	0	0	0	0.65	0	0.65
Bra016041.1-P	Bra035235.1-P	3711.Bra016041.1-P	3711.Bra035235.1-P	0	0	0	0	0	0	0.65	0.095	0.669
Bra016041.1-P	Bra031934.1-P	3711.Bra016041.1-P	3711.Bra031934.1-P	0	0	0	0	0	0	0.65	0.127	0.681
Bra017120.1-P	Bra003119.1-P	3711.Bra017120.1-P	3711.Bra003119.1-P	0	0	0	0	0	0.05	0	0.534	0.538
Bra017120.1-P	Bra011510.1-P	3711.Bra017120.1-P	3711.Bra011510.1-P	0	0	0	0	0	0	0.65	0	0.65
Bra017120.1-P	Bra016041.1-P	3711.Bra017120.1-P	3711.Bra016041.1-P	0	0	0	0	0	0	0.65	0	0.65
Bra017120.1-P	Bra017639.1-P	3711.Bra017120.1-P	3711.Bra017639.1-P	0	0	0	0	0	0	0.65	0	0.65
Bra017120.1-P	Bra022425.1-P	3711.Bra017120.1-P	3711.Bra022425.1-P	0	0	0	0	0	0	0.65	0	0.65
Bra017639.1-P	Bra002269.1-P	3711.Bra017639.1-P	3711.Bra002269.1-P	0	0	0	0	0	0	0.65	0	0.65
Bra017639.1-P	Bra003918.1-P	3711.Bra017639.1-P	3711.Bra003918.1-P	0	0	0	0	0	0	0.65	0	0.65
Bra017639.1-P	Bra006769.1-P	3711.Bra017639.1-P	3711.Bra006769.1-P	0	0	0	0	0	0	0.65	0	0.65
Bra017639.1-P	Bra015403.1-P	3711.Bra017639.1-P	3711.Bra015403.1-P	0	0	0	0	0	0	0.65	0	0.65
Bra017639.1-P	Bra017120.1-P	3711.Bra017639.1-P	3711.Bra017120.1-P	0	0	0	0	0	0	0.65	0	0.65
Bra017639.1-P	Bra026822.1-P	3711.Bra017639.1-P	3711.Bra026822.1-P	0	0	0	0	0	0	0.65	0	0.65
Bra017639.1-P	Bra033040.1-P	3711.Bra017639.1-P	3711.Bra033040.1-P	0	0	0	0	0	0	0.65	0	0.65
Bra017639.1-P	Bra031934.1-P	3711.Bra017639.1-P	3711.Bra031934.1-P	0	0	0	0	0	0	0.65	0.093	0.668
Bra017639.1-P	Bra035235.1-P	3711.Bra017639.1-P	3711.Bra035235.1-P	0	0	0	0	0	0	0.65	0.127	0.681
Bra018736.1-P	Bra035235.1-P	3711.Bra018736.1-P	3711.Bra035235.1-P	0	0	0	0	0	0	0	0.733	0.733
Bra022425.1-P	Bra002269.1-P	3711.Bra022425.1-P	3711.Bra002269.1-P	0	0	0	0	0	0	0.65	0	0.65
Bra022425.1-P	Bra003918.1-P	3711.Bra022425.1-P	3711.Bra003918.1-P	0	0	0	0	0	0	0.65	0	0.65
Bra022425.1-P	Bra006769.1-P	3711.Bra022425.1-P	3711.Bra006769.1-P	0	0	0	0	0	0	0.65	0	0.65
Bra022425.1-P	Bra015403.1-P	3711.Bra022425.1-P	3711.Bra015403.1-P	0	0	0	0	0	0	0.65	0	0.65
Bra022425.1-P	Bra017120.1-P	3711.Bra022425.1-P	3711.Bra017120.1-P	0	0	0	0	0	0	0.65	0	0.65
Bra022425.1-P	Bra033040.1-P	3711.Bra022425.1-P	3711.Bra033040.1-P	0	0	0	0	0	0	0.65	0	0.65
Bra022425.1-P	Bra026822.1-P	3711.Bra022425.1-P	3711.Bra026822.1-P	0	0	0	0	0	0	0.65	0	0.65
Bra022425.1-P	Bra031934.1-P	3711.Bra022425.1-P	3711.Bra031934.1-P	0	0	0	0	0	0	0.65	0.093	0.668
Bra022425.1-P	Bra035235.1-P	3711.Bra022425.1-P	3711.Bra035235.1-P	0	0	0	0	0	0	0.65	0.127	0.681
Bra026822.1-P	Bra003119.1-P	3711.Bra026822.1-P	3711.Bra003119.1-P	0	0	0	0	0	0.05	0	0.712	0.714
Bra026822.1-P	Bra011510.1-P	3711.Bra026822.1-P	3711.Bra011510.1-P	0	0	0	0	0	0	0.65	0	0.65
Bra026822.1-P	Bra016041.1-P	3711.Bra026822.1-P	3711.Bra016041.1-P	0	0	0	0	0	0	0.65	0	0.65
Bra026822.1-P	Bra017639.1-P	3711.Bra026822.1-P	3711.Bra017639.1-P	0	0	0	0	0	0	0.65	0	0.65
Bra026822.1-P	Bra022425.1-P	3711.Bra026822.1-P	3711.Bra022425.1-P	0	0	0	0	0	0	0.65	0	0.65
Bra031934.1-P	Bra011510.1-P	3711.Bra031934.1-P	3711.Bra011510.1-P	0	0	0	0	0	0	0.65	0.093	0.668
Bra031934.1-P	Bra016041.1-P	3711.Bra031934.1-P	3711.Bra016041.1-P	0	0	0	0	0	0	0.65	0.127	0.681
Bra031934.1-P	Bra017639.1-P	3711.Bra031934.1-P	3711.Bra017639.1-P	0	0	0	0	0	0	0.65	0.093	0.668
Bra031934.1-P	Bra022425.1-P	3711.Bra031934.1-P	3711.Bra022425.1-P	0	0	0	0	0	0	0.65	0.093	0.668
Bra033040.1-P	Bra011510.1-P	3711.Bra033040.1-P	3711.Bra011510.1-P	0	0	0	0	0	0	0.65	0	0.65
Bra033040.1-P	Bra016041.1-P	3711.Bra033040.1-P	3711.Bra016041.1-P	0	0	0	0	0	0	0.65	0	0.65
Bra033040.1-P	Bra017639.1-P	3711.Bra033040.1-P	3711.Bra017639.1-P	0	0	0	0	0	0	0.65	0	0.65
Bra033040.1-P	Bra022425.1-P	3711.Bra033040.1-P	3711.Bra022425.1-P	0	0	0	0	0	0	0.65	0	0.65
Bra033040.1-P	Bra038948.1-P	3711.Bra033040.1-P	3711.Bra038948.1-P	0	0	0	0	0	0	0	0.711	0.711
Bra035235.1-P	Bra004121.1-P	3711.Bra035235.1-P	3711.Bra004121.1-P	0	0	0	0	0.056	0	0	0.711	0.715
Bra035235.1-P	Bra011510.1-P	3711.Bra035235.1-P	3711.Bra011510.1-P	0	0	0	0	0	0	0.65	0.127	0.681
Bra035235.1-P	Bra014765.1-P	3711.Bra035235.1-P	3711.Bra014765.1-P	0	0	0	0	0.056	0	0	0.71	0.714
Bra035235.1-P	Bra016041.1-P	3711.Bra035235.1-P	3711.Bra016041.1-P	0	0	0	0	0	0	0.65	0.095	0.669
Bra035235.1-P	Bra017639.1-P	3711.Bra035235.1-P	3711.Bra017639.1-P	0	0	0	0	0	0	0.65	0.127	0.681
Bra035235.1-P	Bra018736.1-P	3711.Bra035235.1-P	3711.Bra018736.1-P	0	0	0	0	0	0	0	0.733	0.733
Bra035235.1-P	Bra022425.1-P	3711.Bra035235.1-P	3711.Bra022425.1-P	0	0	0	0	0	0	0.65	0.127	0.681
Bra038948.1-P	Bra033040.1-P	3711.Bra038948.1-P	3711.Bra033040.1-P	0	0	0	0	0	0	0	0.711	0.711

## Sheet: enrichment.KEGG
Table S6 Predicting interactions between BrAPXs using STRING software.
#term ID	term description	observed gene count	background gene count	strength	false discovery rate	matching proteins in your network (IDs)	matching proteins in your network (labels)
brp00940	Phenylpropanoid biosynthesis	13	246	2.03	6.29e-22	3711.Bra002269.1-P,3711.Bra003918.1-P,3711.Bra006769.1-P,3711.Bra011510.1-P,3711.Bra015403.1-P,3711.Bra016041.1-P,3711.Bra017120.1-P,3711.Bra017639.1-P,3711.Bra022425.1-P,3711.Bra026822.1-P,3711.Bra031934.1-P,3711.Bra033040.1-P,3711.Bra035235.1-P	Bra002269.1-P,Bra003918.1-P,Bra006769.1-P,Bra011510.1-P,Bra015403.1-P,Bra016041.1-P,Bra017120.1-P,Bra017639.1-P,Bra022425.1-P,Bra026822.1-P,Bra031934.1-P,Bra033040.1-P,Bra035235.1-P
brp01110	Biosynthesis of secondary metabolites	13	1644	1.21	9.78e-12	3711.Bra002269.1-P,3711.Bra003918.1-P,3711.Bra006769.1-P,3711.Bra011510.1-P,3711.Bra015403.1-P,3711.Bra016041.1-P,3711.Bra017120.1-P,3711.Bra017639.1-P,3711.Bra022425.1-P,3711.Bra026822.1-P,3711.Bra031934.1-P,3711.Bra033040.1-P,3711.Bra035235.1-P	Bra002269.1-P,Bra003918.1-P,Bra006769.1-P,Bra011510.1-P,Bra015403.1-P,Bra016041.1-P,Bra017120.1-P,Bra017639.1-P,Bra022425.1-P,Bra026822.1-P,Bra031934.1-P,Bra033040.1-P,Bra035235.1-P
brp01100	Metabolic pathways	15	3016	1.01	1.69e-11	3711.Bra002269.1-P,3711.Bra003918.1-P,3711.Bra004121.1-P,3711.Bra006769.1-P,3711.Bra011510.1-P,3711.Bra014765.1-P,3711.Bra015403.1-P,3711.Bra016041.1-P,3711.Bra017120.1-P,3711.Bra017639.1-P,3711.Bra022425.1-P,3711.Bra026822.1-P,3711.Bra031934.1-P,3711.Bra033040.1-P,3711.Bra035235.1-P	Bra002269.1-P,Bra003918.1-P,Bra004121.1-P,Bra006769.1-P,Bra011510.1-P,Bra014765.1-P,Bra015403.1-P,Bra016041.1-P,Bra017120.1-P,Bra017639.1-P,Bra022425.1-P,Bra026822.1-P,Bra031934.1-P,Bra033040.1-P,Bra035235.1-P
brp00604	Glycosphingolipid biosynthesis - ganglio series	2	5	2.91	0.00054	3711.Bra004121.1-P,3711.Bra014765.1-P	Bra004121.1-P,Bra014765.1-P
brp00531	Glycosaminoglycan degradation	2	10	2.61	0.0013	3711.Bra004121.1-P,3711.Bra014765.1-P	Bra004121.1-P,Bra014765.1-P
brp00603	Glycosphingolipid biosynthesis - globo and isoglobo series	2	11	2.57	0.0013	3711.Bra004121.1-P,3711.Bra014765.1-P	Bra004121.1-P,Bra014765.1-P
brp00511	Other glycan degradation	2	20	2.31	0.0034	3711.Bra004121.1-P,3711.Bra014765.1-P	Bra004121.1-P,Bra014765.1-P
brp00513	Various types of N-glycan biosynthesis	2	41	2	0.0114	3711.Bra004121.1-P,3711.Bra014765.1-P	Bra004121.1-P,Bra014765.1-P

## Sheet: enrichment.Keyword
Table S6 Predicting interactions between BrAPXs using STRING software.
#term ID	term description	observed gene count	background gene count	strength	false discovery rate	matching proteins in your network (IDs)	matching proteins in your network (labels)
KW-0376	Hydrogen peroxide	8	107	2.19	3.36e-13	3711.Bra002269.1-P,3711.Bra003918.1-P,3711.Bra006769.1-P,3711.Bra015403.1-P,3711.Bra017120.1-P,3711.Bra031934.1-P,3711.Bra033040.1-P,3711.Bra035235.1-P	Bra002269.1-P,Bra003918.1-P,Bra006769.1-P,Bra015403.1-P,Bra017120.1-P,Bra031934.1-P,Bra033040.1-P,Bra035235.1-P
KW-1015	Disulfide bond	8	306	1.73	3.85e-10	3711.Bra002269.1-P,3711.Bra003918.1-P,3711.Bra006769.1-P,3711.Bra015403.1-P,3711.Bra017120.1-P,3711.Bra031934.1-P,3711.Bra033040.1-P,3711.Bra035235.1-P	Bra002269.1-P,Bra003918.1-P,Bra006769.1-P,Bra015403.1-P,Bra017120.1-P,Bra031934.1-P,Bra033040.1-P,Bra035235.1-P
KW-0106	Calcium	8	381	1.63	1.6e-09	3711.Bra002269.1-P,3711.Bra003918.1-P,3711.Bra006769.1-P,3711.Bra015403.1-P,3711.Bra017120.1-P,3711.Bra031934.1-P,3711.Bra033040.1-P,3711.Bra035235.1-P	Bra002269.1-P,Bra003918.1-P,Bra006769.1-P,Bra015403.1-P,Bra017120.1-P,Bra031934.1-P,Bra033040.1-P,Bra035235.1-P
KW-0349	Heme	8	398	1.62	1.8e-09	3711.Bra002269.1-P,3711.Bra003918.1-P,3711.Bra006769.1-P,3711.Bra015403.1-P,3711.Bra017120.1-P,3711.Bra031934.1-P,3711.Bra033040.1-P,3711.Bra035235.1-P	Bra002269.1-P,Bra003918.1-P,Bra006769.1-P,Bra015403.1-P,Bra017120.1-P,Bra031934.1-P,Bra033040.1-P,Bra035235.1-P
KW-0964	Secreted	8	399	1.61	1.8e-09	3711.Bra002269.1-P,3711.Bra003918.1-P,3711.Bra006769.1-P,3711.Bra015403.1-P,3711.Bra017120.1-P,3711.Bra031934.1-P,3711.Bra033040.1-P,3711.Bra035235.1-P	Bra002269.1-P,Bra003918.1-P,Bra006769.1-P,Bra015403.1-P,Bra017120.1-P,Bra031934.1-P,Bra033040.1-P,Bra035235.1-P
KW-0479	Metal-binding	13	2687	1	2.78e-09	3711.Bra002269.1-P,3711.Bra003918.1-P,3711.Bra006769.1-P,3711.Bra011510.1-P,3711.Bra015403.1-P,3711.Bra016041.1-P,3711.Bra017120.1-P,3711.Bra017639.1-P,3711.Bra018736.1-P,3711.Bra022425.1-P,3711.Bra031934.1-P,3711.Bra033040.1-P,3711.Bra035235.1-P	Bra002269.1-P,Bra003918.1-P,Bra006769.1-P,Bra011510.1-P,Bra015403.1-P,Bra016041.1-P,Bra017120.1-P,Bra017639.1-P,Bra018736.1-P,Bra022425.1-P,Bra031934.1-P,Bra033040.1-P,Bra035235.1-P
KW-0732	Signal	10	3657	0.75	0.00024	3711.Bra002269.1-P,3711.Bra003918.1-P,3711.Bra004121.1-P,3711.Bra006769.1-P,3711.Bra014765.1-P,3711.Bra015403.1-P,3711.Bra017120.1-P,3711.Bra031934.1-P,3711.Bra033040.1-P,3711.Bra035235.1-P	Bra002269.1-P,Bra003918.1-P,Bra004121.1-P,Bra006769.1-P,Bra014765.1-P,Bra015403.1-P,Bra017120.1-P,Bra031934.1-P,Bra033040.1-P,Bra035235.1-P

## Sheet: enrichment.NetworkNeighborAL
	Table S6 Predicting interactions between BrAPXs using STRING software.
#term ID	term description	observed gene count	background gene count	strength	false discovery rate	matching proteins in your network (IDs)	matching proteins in your network (labels)
CL:46030	Plant peroxidase, and Plant methyltransferase dimerisation	9	71	2.41	2.06e-13	3711.Bra003918.1-P,3711.Bra006769.1-P,3711.Bra011510.1-P,3711.Bra015403.1-P,3711.Bra017120.1-P,3711.Bra017639.1-P,3711.Bra022425.1-P,3711.Bra031934.1-P,3711.Bra033040.1-P	Bra003918.1-P,Bra006769.1-P,Bra011510.1-P,Bra015403.1-P,Bra017120.1-P,Bra017639.1-P,Bra022425.1-P,Bra031934.1-P,Bra033040.1-P
CL:46040	Phenylpropanoid biosynthesis	8	61	2.43	5.07e-12	3711.Bra003918.1-P,3711.Bra006769.1-P,3711.Bra011510.1-P,3711.Bra015403.1-P,3711.Bra017120.1-P,3711.Bra017639.1-P,3711.Bra022425.1-P,3711.Bra031934.1-P	Bra003918.1-P,Bra006769.1-P,Bra011510.1-P,Bra015403.1-P,Bra017120.1-P,Bra017639.1-P,Bra022425.1-P,Bra031934.1-P
CL:46050	Phenylpropanoid biosynthesis	7	51	2.45	4.12e-10	3711.Bra003918.1-P,3711.Bra006769.1-P,3711.Bra011510.1-P,3711.Bra017120.1-P,3711.Bra017639.1-P,3711.Bra022425.1-P,3711.Bra031934.1-P	Bra003918.1-P,Bra006769.1-P,Bra011510.1-P,Bra017120.1-P,Bra017639.1-P,Bra022425.1-P,Bra031934.1-P
CL:46056	mixed, incl. Plant methyltransferase dimerisation, and Alcohol dehydrogenase, zinc-type, conserved site	6	40	2.49	2.93e-08	3711.Bra003918.1-P,3711.Bra006769.1-P,3711.Bra011510.1-P,3711.Bra017639.1-P,3711.Bra022425.1-P,3711.Bra031934.1-P	Bra003918.1-P,Bra006769.1-P,Bra011510.1-P,Bra017639.1-P,Bra022425.1-P,Bra031934.1-P
CL:46058	mixed, incl. Plant methyltransferase dimerisation, and Alcohol dehydrogenase, zinc-type, conserved site	5	35	2.47	4.62e-06	3711.Bra003918.1-P,3711.Bra006769.1-P,3711.Bra011510.1-P,3711.Bra017639.1-P,3711.Bra022425.1-P	Bra003918.1-P,Bra006769.1-P,Bra011510.1-P,Bra017639.1-P,Bra022425.1-P
CL:46060	mixed, incl. Plant methyltransferase dimerisation, and Alcohol dehydrogenase, zinc-type, conserved site	4	29	2.45	0.00068	3711.Bra006769.1-P,3711.Bra011510.1-P,3711.Bra017639.1-P,3711.Bra022425.1-P	Bra006769.1-P,Bra011510.1-P,Bra017639.1-P,Bra022425.1-P
CL:46096	mixed, incl. Alanine dehydrogenase/PNT, C-terminal domain, and Orn/DAP/Arg decarboxylase 2, conserved site	3	11	2.75	0.0135	3711.Bra011510.1-P,3711.Bra017639.1-P,3711.Bra022425.1-P	Bra011510.1-P,Bra017639.1-P,Bra022425.1-P
