# Supplementary material for: Genome-Wide Identification and Analysis of the Ascorbate Peroxidase (APX) Gene Family of Winter Rapeseed (Brassica rapa L.) Under Abiotic Stress
Source: Front Genet. 2022 Jan 21;12:753624. doi: 10.3389/fgene.2021.753624 (PMC8814366; doi:10.3389/fgene.2021.753624)
Supplement: Supplementary file 7 [file Table4.XLSX]

## Sheet: B. rapa
Table S4 The gene duplication events and Ka/Ks values of Brassica rapa and Brassica napus
Seq_1	Seq_2	Ka	Ks	Ka_Ks	EffectiveLen	AverageS-sites	AverageN-sites	cN	cS	pN	pS
Bra000228	Bra016930	0.0493633	0.376234	0.131204	978	234.917	743.083	35.5	69.5	0.0477739	0.29585
Bra011771	Bra017830	0.0547902	0.267151	0.205091	753	175.75	577.25	30.5	39.5	0.0528367	0.224751
Bra025604	Bra039059	0.135597	0.583826	0.232255	951	241.583	709.417	88	98	0.124046	0.405657
Bra025604	Bra033040	0.136408	0.577201	0.236327	957	243.417	713.583	89	98	0.124723	0.402602
Bra026207	Bra026822	0.0381915	0.379302	0.100689	864	210.5	653.5	24.3333	62.6667	0.0372354	0.297704
Bra002271	Bra020072	0.080703	0.297396	0.271365	840	199.583	640.417	49	49	0.0765127	0.245511
Bra024267	Bra031934	0.0691604	0.307995	0.22455	999	257.333	741.667	49	65	0.0660674	0.252591
Bra023639	Bra036445	0.256229	1.21187	0.211433	930	227	703	152.583	136.417	0.217046	0.600954
Bra001084	Bra023639	0.240758	1.47399	0.163337	930	231.167	698.833	143.917	149.083	0.205938	0.644917
Bra006423	Bra023639	0.0350856	0.209443	0.167518	930	229.833	700.167	24	42	0.0342776	0.182741
Bra018006	Bra029933	0.0542839	0.309274	0.17552	1047	254.5	792.5	41.5	64.5	0.0523659	0.253438
Bra036842	Bra037176	0.193588	1.29286	0.149735	1005	232.333	772.667	131.833	143.167	0.170621	0.616212
Bra017761	Bra036842	0.328074	1.68509	0.194692	993	227.5	765.5	203.417	152.583	0.26573	0.670696
Bra011170	Bra024102	0.0387272	0.361353	0.107173	972	230.167	741.833	28	66	0.0377443	0.286749
Bra017206	Bra023099	0.0339424	0.25583	0.132676	984	230.667	753.333	25	50	0.0331858	0.216763
Bra004343	Bra038345	0.0442933	0.380844	0.116303	1005	237.75	767.25	33	71	0.0430108	0.298633
Bra004014	Bra004343	0.0470163	0.381696	0.123177	1002	234	768	35	70	0.0455729	0.299145
Bra033040	Bra039059	0.0574966	0.254412	0.225998	957	243.333	713.667	39.5	52.5	0.055348	0.215753
Bra001084	Bra036445	0.259844	1.0544	0.246438	945	229.333	715.667	157.167	129.833	0.219609	0.566134
Bra012061	Bra037176	0.0513104	0.364921	0.140607	930	220.917	709.083	35.1667	63.8333	0.0495945	0.288948
Bra008715	Bra021488	0.164772	0.942248	0.174871	954	226.167	727.833	107.667	121.333	0.147928	0.536478
Bra021488	Bra039137	0.0243981	0.256312	0.0951889	957	228	729	17.5	49.5	0.0240055	0.217105
Bra015403	Bra030607	0.190483	0.502751	0.378881	960	234.75	725.25	122	86	0.168218	0.366347
Bra030607	Bra032475	0.144678	0.275229	0.525664	945	229.333	715.667	94.1667	52.8333	0.131579	0.230378
Bra009728	Bra026470	0.0493805	0.308631	0.159999	978	235.167	742.833	35.5	59.5	0.04779	0.253012
Bra013943	Bra019132	0.0310215	0.280672	0.110526	936	228.5	707.5	21.5	53.5	0.0303887	0.234136
Bra002270	Bra020071	0.0639428	0.292371	0.218704	987	240.583	746.417	45.75	58.25	0.0612928	0.24212
Bra018677	Bra030706	0.0927787	0.267089	0.347369	750	171.333	578.667	50.5	38.5	0.0872696	0.224708
Bra030706	Bra031598	0.0772825	0.404091	0.19125	750	171.25	578.75	42.5	53.5	0.0734341	0.312409
Bra005850	Bra009105	0.184891	0.449277	0.41153	828	208.583	619.417	101.5	70.5	0.163864	0.337994
Bra009105	Bra028761	0.0667231	0.316294	0.210953	828	206.667	621.333	39.6667	53.3333	0.0638412	0.258065
Bra006769	Bra020370	0.166591	0.929851	0.179159	948	227.833	720.167	107.583	121.417	0.149387	0.532919
Bra022090	Bra040175	0.223592	2.29459	0.0974432	981	225	756	146.167	160.833	0.193342	0.714815
Bra024972	Bra040175	0.238265	1.67056	0.142626	777	179.333	597.667	122	120	0.204127	0.669145
Bra011771	Bra031832	0.237063	2.16342	0.109578	972	228.667	743.333	151.083	161.917	0.203251	0.70809
Bra031832	Bra037849	0.100112	0.282295	0.354637	969	227.417	741.583	69.5	53.5	0.0937184	0.235251
Bra008775	Bra023449	0.0972407	0.485614	0.200243	792	194.417	597.583	54.5	69.5	0.0912007	0.35748
Bra023149	Bra039872	0.0618605	0.27827	0.222304	1020	250.917	769.083	45.6667	58.3333	0.059378	0.232481
Bra014895	Bra023149	0.0604644	0.346369	0.174566	1041	257.75	783.25	45.5	71.5	0.0580913	0.277401
Bra022090	Bra024972	0.0244644	0.317322	0.0770966	786	183.583	602.417	14.5	47.5	0.0240697	0.258738
Bra022567	Bra028285	0.0442285	0.472229	0.0936589	966	232.583	733.417	31.5	81.5	0.0429497	0.350412
Bra017761	Bra039920	0.11152	0.784871	0.142087	993	227.417	765.583	79.3333	110.667	0.103625	0.486625
Bra011683	Bra039920	0.126495	0.927409	0.136396	1008	227.667	780.333	90.8333	121.167	0.116403	0.532211
Bra013053	Bra017686	0.116122	0.911537	0.127391	861	205.667	655.333	70.5	108.5	0.107579	0.527553
Bra024268	Bra031933	0.35055	3.38297	0.103622	954	240.083	713.917	199.917	178.083	0.280028	0.741756
Bra018677	Bra031598	0.0491039	0.424019	0.115806	759	173.417	585.583	27.8333	56.1667	0.047531	0.323883
Bra000058	Bra017121	0.0729399	0.307836	0.236944	1050	251.5	798.5	55.5	63.5	0.0695053	0.252485
Bra023862	Bra031309	0.0553055	0.272265	0.203131	978	227.75	750.25	40	52	0.0533156	0.228321
Bra011683	Bra017761	0.073742	0.355784	0.207266	993	226.5	766.5	53.8333	64.1667	0.0702327	0.283297
Bra003918	Bra016127	0.0364607	0.299615	0.121692	1086	257.083	828.917	29.5	63.5	0.0355886	0.247002
Bra030241	Bra038526	0.0410039	0.340035	0.120587	939	216.417	722.583	28.8333	59.1667	0.0399031	0.273392
Bra005850	Bra028761	0.203743	0.485688	0.419494	972	237.75	734.25	131	85	0.178413	0.357518
Bra004014	Bra038345	0.0631738	0.377102	0.167524	1002	234.5	767.5	46.5	69.5	0.0605863	0.296375
Bra008291	Bra015695	0.0933396	0.317587	0.293902	957	222.083	734.917	64.5	57.5	0.0877651	0.258912
Bra034561	Bra037007	0.0948831	0.241402	0.39305	912	210.75	701.25	62.5	43.5	0.0891266	0.206406
Bra011438	Bra034561	0.0927808	0.263862	0.351627	912	210.167	701.833	61.25	46.75	0.0872714	0.222443
Bra015404	Bra032474	0.0232878	0.298979	0.0778909	861	206.833	654.167	15	51	0.0229299	0.246575
Bra011438	Bra037007	0.0736282	0.276892	0.26591	912	210.917	701.083	49.1667	48.8333	0.0701296	0.231529
Bra008715	Bra039137	0.162611	1.03917	0.156481	957	228.5	728.5	106.5	128.5	0.146191	0.562363
Bra008715	Bra023509	0.0671109	0.327963	0.20463	987	231.5	755.5	48.5	61.5	0.0641959	0.265659
Bra015402	Bra032476	0.192548	0.704677	0.273243	951	228.167	722.833	122.75	104.25	0.169818	0.456903
Bra023509	Bra039137	0.175798	1.03954	0.169112	954	225.5	728.5	114.167	126.833	0.156715	0.562454

## Sheet: B. napus
Table S4 The gene duplication events and Ka/Ks values of Brassica rapa and Brassica napus
Seq_1	Seq_2	Ka	Ks	Ka_Ks	EffectiveLen	AverageS-sites	AverageN-sites	cN	cS	pN	pS
BnaA10g03270D	BnaC08g44110D	0.0581595	0.347097	0.16756	957	227.333	729.667	40.8333	63.1667	0.0559616	0.277859
BnaC05g03280D	BnaC08g44110D	0.052333	0.338259	0.154713	957	228.333	728.667	36.8333	62.1667	0.0505489	0.272263
BnaA04g25090D	BnaC04g48960D	0.0369202	0.131877	0.279959	999	235.667	763.333	27.5	28.5	0.0360262	0.120934
BnaA01g34030D	BnaC01g40580D	0.00978123	0.0847295	0.115441	945	224.667	720.333	7	18	0.00971772	0.0801187
BnaA10g03290D	BnaC05g03300D	0.0137037	0.02153	0.636493	972	235.583	736.417	10	5	0.0135793	0.0212239
BnaA03g55260D	BnaC09g50000D	0.188093	0.483068	0.389372	966	238.667	727.333	121	85	0.166361	0.356145
BnaC02g02350D	BnaC09g50000D	0.061419	0.36883	0.166524	966	236.833	729.167	43	69	0.0589714	0.291344
BnaA10g25070D	BnaC09g50000D	0.00550461	0.131958	0.0417148	969	239.667	729.333	4	29	0.00548446	0.121001
BnaC03g02110D	BnaC09g50000D	0.186868	0.488888	0.38223	966	238.5	727.5	120.333	85.6667	0.165407	0.359189
BnaA02g02520D	BnaC02g05920D	0.0120056	0.0931428	0.128894	984	228.333	755.667	9	20	0.01191	0.0875912
BnaA02g02520D	BnaA10g18930D	0.0689901	0.33065	0.20865	981	230	751	49.5	61.5	0.0659121	0.267391
BnaA01g06830D	BnaC07g42360D	0.0382381	0.326887	0.116977	966	228.333	737.667	27.5	60.5	0.0372797	0.264964
BnaA03g17000D	BnaC03g20530D	0.00132876	0.0354965	0.0374335	984	230.75	753.25	1	8	0.00132758	0.0346696
BnaA03g17800D	BnaA04g21990D	0.17233	0.449582	0.383311	780	184.083	595.917	91.75	62.25	0.153964	0.338162
BnaA04g21990D	BnaC04g56590D	0.0050431	0.0204233	0.246928	1044	248.167	795.833	4	5	0.00502618	0.0201478
BnaA04g12860D	BnaC04g34810D	0.00934904	0.0314065	0.297679	981	227.583	753.417	7	7	0.00929101	0.030758
BnaA09g42650D	BnaC04g34810D	0.0371549	0.354882	0.104696	933	215.75	717.25	26	61	0.0362496	0.282735
BnaC04g34810D	BnaC08g35130D	0.0451985	0.364404	0.124034	981	228.667	752.333	33	66	0.0438635	0.28863
BnaA09g07380D	BnaC02g16700D	0.0815676	0.242875	0.335842	876	209.667	666.333	51.5	43.5	0.0772886	0.207472
BnaA09g07380D	BnaC09g07300D	0.00402056	0.0487977	0.0823924	981	232.833	748.167	3	11	0.0040098	0.0472441
BnaA01g03520D	BnaA03g52510D	0.0716899	0.287174	0.249639	951	217.25	733.75	50.1667	51.8333	0.0683702	0.238588
BnaA01g03520D	BnaA08g11780D	0.102179	0.296168	0.345002	951	215.583	735.417	70.25	52.75	0.0955241	0.244685
BnaA01g03520D	BnaC07g44240D	0.0754482	0.297368	0.25372	951	217.25	733.75	52.6667	53.3333	0.0717774	0.245493
BnaA01g03520D	BnaC01g04790D	0.0137162	0.0939111	0.146056	951	215.25	735.75	10	19	0.0135916	0.0882695
BnaA03g47720D	BnaC01g17990D	0.0661586	0.268786	0.246138	750	181.5	568.5	36	41	0.0633245	0.225895
BnaA01g15230D	BnaA03g47720D	0.0342085	0.269828	0.126779	930	227.25	702.75	23.5	51.5	0.0334401	0.226623
BnaA03g47720D	BnaC07g40000D	0.00426744	0.0553246	0.0771345	930	225	705	3	12	0.00425532	0.0533333
BnaA07g33560D	BnaC06g38150D	0.0133531	0.123248	0.108343	1299	316.75	982.25	13	36	0.0132349	0.113654
BnaA05g22930D	BnaC05g36360D	0.00916542	0.102724	0.0892234	1008	239.583	768.417	7	23	0.00910964	0.096
BnaA03g06740D	BnaC02g07500D	0.0241161	0.173875	0.138698	924	228.75	695.25	16.5	35.5	0.0237325	0.155191
BnaC02g07500D	BnaC03g08610D	0.0255904	0.185287	0.138112	924	228.417	695.583	17.5	37.5	0.0251587	0.164174
BnaA02g03720D	BnaC02g07500D	0.0182026	0.115477	0.15763	924	228.917	695.083	12.5	24.5	0.0179835	0.107026
BnaA02g02010D	BnaA10g19500D	0.0899038	0.410461	0.219032	786	191.917	594.083	50.3333	60.6667	0.0847244	0.316109
BnaA10g28250D	BnaC06g01060D	0.00507026	0.0336073	0.150868	1035	243.417	791.583	4	8	0.00505316	0.0328655
BnaA02g04550D	BnaC09g37760D	0.06431	0.282927	0.227303	981	238.667	742.333	45.75	56.25	0.06163	0.235684
BnaA02g04550D	BnaC02g09180D	0.00857888	0.0479311	0.178983	780	193.833	586.167	5	9	0.00853	0.0464316
BnaA02g04550D	BnaA10g15320D	0.0673066	0.288203	0.233539	981	239.25	741.75	47.75	57.25	0.0643748	0.239289
BnaA01g17520D	BnaC01g21870D	0.0182343	0.0669736	0.272261	1098	265.333	832.667	15	17	0.0180144	0.0640704
BnaA09g05060D	BnaC07g30370D	0.0380377	0.324617	0.117177	1017	248.583	768.417	28.5	65.5	0.0370893	0.263493
BnaA09g05060D	BnaC09g04610D	0.0104668	0.050158	0.208677	1017	247.333	769.667	8	12	0.0103941	0.0485175
BnaA06g26600D	BnaA09g05060D	0.0414313	0.304225	0.136186	1017	247.917	769.083	31	62	0.0403077	0.250084
BnaA06g04380D	BnaC08g43490D	0.0522181	0.366557	0.142456	759	174.167	584.833	29.5	50.5	0.0504417	0.289952
BnaC05g05550D	BnaC08g43490D	0.0400314	0.376733	0.106259	744	171.083	572.917	22.3333	50.6667	0.0389818	0.296152
BnaA09g49190D	BnaC08g43490D	0.0191843	0.0795447	0.241176	753	172.25	580.75	11	13	0.018941	0.0754717
BnaA01g03170D	BnaC01g04440D	0.0386852	0.102505	0.3774	1194	292.25	901.75	34	28	0.0377045	0.0958084
BnaA03g55260D	BnaC02g02350D	0.205269	0.481232	0.426548	966	236.5	729.5	131	84	0.179575	0.35518
BnaA03g55260D	BnaA10g25070D	0.19564	0.481076	0.406671	966	238.667	727.333	125.25	84.75	0.172204	0.355098
BnaA03g55260D	BnaC03g02110D	0.0466245	0.048112	0.969084	966	237.833	728.167	32.9167	11.0833	0.0452049	0.0466013
BnaA01g08600D	BnaC07g34540D	0.148934	0.448708	0.331916	975	223.583	751.417	101.5	75.5	0.135078	0.337682
BnaC01g10300D	BnaC07g34540D	0.14919	0.445526	0.334862	975	224.75	750.25	101.5	75.5	0.135288	0.335929
BnaA03g43240D	BnaC07g34540D	0.0133485	0.0795757	0.167746	981	225.167	755.833	10	17	0.0132304	0.0754996
BnaA10g25070D	BnaC02g02350D	0.0631576	0.347278	0.181865	966	236.833	729.167	44.1667	65.8333	0.0605714	0.277973
BnaC02g02350D	BnaC03g02110D	0.203116	0.48305	0.420486	966	236.333	729.667	129.833	84.1667	0.177935	0.356135
BnaA02g18580D	BnaA07g33290D	0.108187	0.327588	0.330253	1002	231.083	770.917	77.6667	61.3333	0.100746	0.265417
BnaA02g18580D	BnaC06g37840D	0.105718	0.325065	0.325221	1002	231.25	770.75	76	61	0.0986053	0.263784
BnaA01g01280D	BnaC01g02300D	0.0105822	0.125089	0.0845971	987	225.667	761.333	8	26	0.0105079	0.115214
BnaC01g02300D	BnaC07g51170D	0.0386614	0.248359	0.155667	981	224.667	756.333	28.5	47.5	0.0376818	0.211424
BnaA02g14050D	BnaA07g27500D	0.0424833	0.387363	0.109673	999	236.333	762.667	31.5	71.5	0.0413024	0.302539
BnaA02g14050D	BnaC06g29700D	0.0438919	0.386649	0.113519	999	236.667	762.333	32.5	71.5	0.0426323	0.302113
BnaA02g14050D	BnaC02g18660D	0.00789914	0.0749246	0.105428	1002	238.417	763.583	6	17	0.00785769	0.0713037
BnaA02g29220D	BnaC09g01650D	0.0594298	0.273503	0.217291	951	242.167	708.833	40.5	55.5	0.0571361	0.229181
BnaA02g29220D	BnaC02g37290D	0.0113787	0.101364	0.112255	951	242.583	708.417	8	23	0.0112928	0.0948128
BnaA02g29220D	BnaA09g02240D	0.0607948	0.284357	0.213797	864	221.833	642.167	37.5	52.5	0.0583961	0.236664
BnaA06g23260D	BnaC03g50050D	0.0108391	0.0539839	0.200784	993	249.583	743.417	8	13	0.0107611	0.0520868
BnaC02g16700D	BnaC09g07300D	0.0807742	0.226151	0.35717	876	210	666	51	41	0.0765766	0.195238
BnaC07g30370D	BnaC09g04610D	0.0455955	0.340572	0.133879	1017	248.417	768.583	34	68	0.0442372	0.273734
BnaA06g26600D	BnaC07g30370D	0.0118113	0.024492	0.482251	1017	249	768	9	6	0.0117188	0.0240964
BnaA02g34070D	BnaC02g42930D	0.0125032	0.0671307	0.186251	975	249.167	725.833	9	16	0.0123995	0.064214
BnaA02g34070D	BnaA06g23270D	0.0645946	0.304225	0.212325	975	247.917	727.083	45	62	0.0618911	0.250084
BnaA07g03710D	BnaC07g05770D	0.0027504	0.0187071	0.147024	945	216.5	728.5	2	4	0.00274537	0.0184758
BnaA03g19490D	BnaC04g47720D	0.0534309	0.338078	0.158043	972	235.167	736.833	38	64	0.051572	0.272147
BnaA03g19490D	BnaA04g23960D	0.049773	0.342037	0.145519	972	234.833	737.167	35.5	64.5	0.0481574	0.274663
BnaA03g19490D	BnaC03g23360D	0.0065622	0.080076	0.0819497	906	217.25	688.75	4.5	16.5	0.00653358	0.0759494
BnaA03g06740D	BnaC01g40580D	0.266264	0.984404	0.270482	924	225	699	156.667	123.333	0.22413	0.548148
BnaA02g03720D	BnaC01g40580D	0.265642	1.03806	0.255903	924	225.5	698.5	156.25	126.75	0.223694	0.562084
BnaA06g04380D	BnaC05g05550D	0.00526087	0.0928541	0.0566574	744	171.75	572.25	3	15	0.00524246	0.0873362
BnaA06g04380D	BnaA09g49190D	0.0422293	0.396681	0.106457	753	172.583	580.417	23.8333	53.1667	0.0410625	0.308064
BnaA01g15150D	BnaC01g17910D	0.02071	0.128165	0.161589	972	237.667	734.333	15	28	0.0204267	0.117812
BnaA01g01280D	BnaA07g01880D	0.1117	0.820621	0.136116	987	224.167	762.833	79.1667	111.833	0.10378	0.498885
BnaA07g07020D	BnaA09g25570D	0.0679737	0.372254	0.1826	990	243.667	746.333	48.5	71.5	0.0649844	0.293434
BnaA09g25570D	BnaC07g08680D	0.0572594	0.341795	0.167525	1035	255	780	43	70	0.0551282	0.27451
BnaA01g00410D	BnaA03g54060D	0.0587645	0.245938	0.23894	972	228.917	743.083	42	48	0.0565213	0.209683
BnaA03g54060D	BnaC01g01390D	0.178206	0.832482	0.214066	951	221.25	729.75	115.75	111.25	0.158616	0.502825
BnaA03g54060D	BnaC07g46560D	0.0204233	0.0885433	0.230659	972	227.5	744.5	15	19	0.0201478	0.0835165
BnaA02g07630D	BnaA03g09760D	0.167145	0.872472	0.191576	963	228.833	734.167	110	118	0.14983	0.515659
BnaA02g07630D	BnaC02g10690D	0.00743417	0.0955518	0.0778025	972	228.5	743.5	5.5	20.5	0.00739744	0.0897155
BnaC02g09180D	BnaC09g37760D	0.0634337	0.245494	0.258392	780	192.25	587.75	35.75	40.25	0.0608252	0.209363
BnaA10g15320D	BnaC09g37760D	0.0135367	0.0343039	0.394612	984	238.583	745.417	10	8	0.0134153	0.0335313
BnaA10g15310D	BnaC02g09190D	0.0978015	0.270854	0.361086	966	231.667	734.333	67.3333	52.6667	0.0916931	0.227338
BnaC02g09190D	BnaC09g37740D	0.0820765	0.271274	0.30256	966	232.833	733.167	57	53	0.0777449	0.227631
BnaA02g04560D	BnaC02g09190D	0.00756887	0.05501	0.137591	966	235.667	730.333	5.5	12.5	0.00753081	0.053041
BnaA04g23960D	BnaC04g47720D	0.00817447	0.090745	0.0900818	972	234	738	6	20	0.00813008	0.0854701
BnaC03g23360D	BnaC04g47720D	0.0535	0.294589	0.181609	903	215.5	687.5	35.5	52.5	0.0516364	0.243619
BnaA03g18320D	BnaC03g21830D	0.0149383	0.111931	0.133459	1071	259.667	811.333	12	27	0.0147905	0.103979
BnaA03g06740D	BnaC03g08610D	0.00432278	0.035935	0.120294	924	228	696	3	8	0.00431034	0.0350877
BnaA02g03720D	BnaA03g06740D	0.033821	0.210854	0.1604	924	228.5	695.5	23	42	0.0330697	0.183807
BnaA04g12860D	BnaA09g42650D	0.0385891	0.348678	0.110673	933	215.167	717.833	27	60	0.0376132	0.278854
BnaA04g12860D	BnaC08g35130D	0.0465744	0.344489	0.135198	981	228.083	752.917	34	63	0.0451577	0.276215
BnaA10g24230D	BnaC09g48850D	0.0138021	0.0550706	0.250626	1068	263.667	804.333	11	14	0.0136759	0.0530973
BnaA10g25070D	BnaC03g02110D	0.19351	0.474937	0.407444	966	238.5	727.5	124.083	83.9167	0.170561	0.351852
BnaA05g34020D	BnaC05g48680D	0.00832764	0.0889584	0.0936127	951	226.5	724.5	6	19	0.00828157	0.0838852
BnaA10g15320D	BnaC02g09180D	0.0690911	0.244491	0.282592	780	192.917	587.083	38.75	40.25	0.0660043	0.208639
BnaA08g02580D	BnaC08g02790D	0.0256522	0.0578278	0.443596	987	233.583	753.417	19	13	0.0252184	0.0556547
BnaA07g01880D	BnaC07g03670D	0.00647672	0.0454685	0.142444	1002	226.667	775.333	5	10	0.00644884	0.0441176
BnaA06g23270D	BnaC02g42930D	0.0624692	0.299453	0.208611	978	248.083	729.917	43.75	61.25	0.0599383	0.246893
BnaA09g31650D	BnaC08g22410D	0.0129803	0.0452114	0.287102	1005	227.917	777.083	10	10	0.0128686	0.0438757
BnaA03g52510D	BnaA08g11780D	0.0950546	0.220377	0.431327	951	217.333	733.667	65.5	41.5	0.0892776	0.190951
BnaA03g52510D	BnaC07g44240D	0.0068619	0.0768672	0.0892695	951	219	732	5	16	0.0068306	0.0730594
BnaA03g52510D	BnaC03g66590D	0.0891937	0.215441	0.414005	843	194.917	648.083	54.5	36.5	0.0840941	0.18726
BnaA03g52510D	BnaC01g04790D	0.0731648	0.29437	0.248547	951	217	734	51.1667	52.8333	0.0697094	0.243472
BnaA03g09760D	BnaC02g10690D	0.170383	0.849593	0.200547	963	228.167	734.833	112	116	0.152416	0.5084
BnaA03g28350D	BnaC03g33490D	0.0204062	0.155302	0.131397	714	180	534	10.75	25.25	0.0201311	0.140278
BnaA07g27500D	BnaC06g25550D	0.0432017	0.34744	0.124343	996	233.75	762.25	32	65	0.041981	0.278075
BnaA07g24420D	BnaC06g25550D	0.00789568	0.0489607	0.161266	996	232.083	763.917	6	11	0.00785426	0.0473968
BnaA10g15310D	BnaC09g37740D	0.0149023	0.0221092	0.674031	975	229.5	745.5	11	5	0.0147552	0.0217865
BnaA02g04560D	BnaA10g15310D	0.0977778	0.315799	0.309621	966	231.5	734.5	67.3333	59.6667	0.0916723	0.257739
BnaA01g20660D	BnaA06g16150D	0.0471823	0.325459	0.144971	1041	253.75	787.25	36	67	0.0457288	0.264039
BnaA06g16150D	BnaC08g20810D	0.0696266	0.215843	0.32258	1053	255.917	797.083	53	48	0.0664924	0.187561
BnaA06g16150D	BnaC01g25860D	0.0498653	0.296245	0.168324	1041	253.333	787.667	38	62	0.0482438	0.244737
BnaA07g33290D	BnaC06g37840D	0.023305	0.0506873	0.459779	1005	227.833	777.167	17.8333	11.1667	0.0229466	0.0490124
BnaA07g27500D	BnaC06g29700D	0.0185809	0.13918	0.133503	999	236.167	762.833	14	30	0.0183526	0.127029
BnaA07g24420D	BnaA07g27500D	0.0438623	0.345141	0.127085	996	233.167	762.833	32.5	64.5	0.0426043	0.276626
BnaA07g27500D	BnaC02g18660D	0.0453198	0.357737	0.126685	999	237.25	761.75	33.5	67.5	0.0439777	0.28451
BnaC03g28220D	BnaC09g25420D	0.0468501	0.451315	0.103808	1044	240.333	803.667	36.5	81.5	0.0454168	0.339112
BnaA03g39250D	BnaC03g46570D	0.00461303	0.0348321	0.132436	858	205.667	652.333	3	7	0.00459888	0.0340357
BnaA03g39250D	BnaA03g53120D	0.114587	0.919779	0.124581	855	205.667	649.333	69	109	0.106263	0.529984
BnaA03g39250D	BnaC07g45330D	0.113486	1.00948	0.11242	855	204.583	650.417	68.5	113.5	0.105317	0.554786
BnaA02g03720D	BnaC03g08610D	0.0353093	0.205424	0.171885	924	228.167	695.833	24	41	0.034491	0.179693
BnaA01g11800D	BnaC01g13370D	0	0.0271318	0	987	225.167	761.833	0	6	0	0.0266469
BnaA07g23450D	BnaC06g32660D	0.0341497	0.324496	0.105239	1080	256.25	823.75	27.5	67.5	0.0333839	0.263415
BnaA07g29460D	BnaC06g32660D	0.00487015	0.0825007	0.0590316	1080	256	824	4	20	0.00485437	0.078125
BnaA01g00410D	BnaC01g01390D	0.16359	0.93232	0.175465	951	223	728	107	119	0.146978	0.533632
BnaA01g00410D	BnaC07g46560D	0.0646392	0.221692	0.291572	972	229.25	742.75	46	44	0.061932	0.19193
BnaC02g42920D	BnaC03g50050D	0.267369	1.80516	0.148114	984	248.5	735.5	165.417	169.583	0.224904	0.682428
BnaA02g34060D	BnaC02g42920D	0.013629	0.0705182	0.193269	993	252.583	740.417	10	17	0.0135059	0.0673045
BnaA06g23250D	BnaC02g42920D	0.0652508	0.296956	0.219732	993	256.917	736.083	46	63	0.0624929	0.245216
BnaA10g18930D	BnaC02g05920D	0.0674847	0.28554	0.236341	981	229.5	751.5	48.5	54.5	0.0645376	0.237473
BnaA07g07020D	BnaC07g08680D	0.0243594	0.0773216	0.31504	996	245	751	18	18	0.023968	0.0734694
BnaA10g18930D	BnaC05g19990D	0.00806279	0.0129967	0.620371	981	232.833	748.167	6	3	0.0080196	0.0128848
BnaA07g24420D	BnaC06g29700D	0.0466682	0.358199	0.130286	996	233.5	762.5	34.5	66.5	0.0452459	0.284797
BnaC02g18660D	BnaC06g29700D	0.0467367	0.343663	0.135996	999	237.583	761.417	34.5	65.5	0.0453103	0.275693
BnaA08g28220D	BnaC08g44130D	0.137476	0.259422	0.529934	990	241.667	748.333	94	53	0.125612	0.21931
BnaA01g01600D	BnaC01g02640D	0.00884373	0.105436	0.0838773	834	208.417	625.583	5.5	20.5	0.00879179	0.0983607
BnaA07g12740D	BnaC09g08120D	0.0242624	0.33782	0.0718204	1002	234.083	767.917	18.3333	63.6667	0.0238741	0.271983
BnaA02g24880D	BnaC07g19810D	0.0246481	0.279772	0.0881006	780	182	598	14.5	42.5	0.0242475	0.233516
BnaA02g24880D	BnaC02g33030D	0.00694385	0.0215842	0.32171	783	180.167	602.833	4.16667	3.83333	0.00691181	0.0212766
BnaA02g24880D	BnaA06g35670D	0.0228831	0.306174	0.0747391	780	181	599	13.5	45.5	0.0225376	0.251381
BnaA09g08390D	BnaC09g08690D	0.0652835	0.119282	0.547306	894	211.583	682.417	42.6667	23.3333	0.0625229	0.11028
BnaA09g57020D	BnaC08g39510D	0.0764866	0.0840756	0.909736	699	171.833	527.167	38.3333	13.6667	0.0727158	0.0795344
BnaA10g03270D	BnaC05g03280D	0.00692686	0.142044	0.0487656	957	231.833	725.167	5	30	0.00689497	0.129403
BnaA09g49190D	BnaC05g05550D	0.0339445	0.388483	0.0873769	744	171.5	572.5	19	52	0.0331878	0.303207
BnaA01g08600D	BnaC09g19870D	0.213359	3.06411	0.0696316	975	224.667	750.333	139.333	165.667	0.185695	0.737389
BnaA01g08600D	BnaC01g10300D	0.0100884	0.0345883	0.291672	1035	236.667	798.333	8	8	0.0100209	0.0338028
BnaA01g08600D	BnaA03g43240D	0.144922	0.452324	0.320394	975	223.75	751.25	99	76	0.13178	0.339665
BnaA04g23960D	BnaC03g23360D	0.04958	0.2986	0.166041	903	215.167	687.833	33	53	0.0479767	0.246321
BnaA02g34060D	BnaC03g50050D	0.2811	1.71052	0.164336	987	249.75	737.25	172.833	168.167	0.23443	0.67334
BnaA08g11780D	BnaC07g44240D	0.0989326	0.229694	0.430715	951	217.333	733.667	68	43	0.0926851	0.197853
BnaA08g11780D	BnaC03g66590D	0.00463203	0.00519033	0.892434	843	193.333	649.667	3	1	0.00461775	0.00517241
BnaA08g11780D	BnaC01g04790D	0.100586	0.282922	0.355524	951	215.333	735.667	69.25	50.75	0.0941323	0.235681
BnaA02g04560D	BnaC09g37740D	0.0820568	0.316012	0.259663	966	232.667	733.333	57	60	0.0777273	0.25788
BnaC02g37290D	BnaC09g01650D	0.0599184	0.304744	0.196619	960	242.25	717.75	41.3333	60.6667	0.0575874	0.25043
BnaA09g02240D	BnaC09g01650D	0.00459185	0.100308	0.0457774	879	223.667	655.333	3	21	0.00457782	0.0938897
BnaA06g26600D	BnaC09g04610D	0.0462458	0.319776	0.144619	1017	247.75	769.25	34.5	64.5	0.0448489	0.260343
BnaA01g01260D	BnaC07g51170D	0.0827995	0.397521	0.20829	981	222	759	59.5	68.5	0.0783926	0.308559
BnaA09g42650D	BnaC08g35130D	0.00418168	0.0234486	0.178334	936	216.583	719.417	3	5	0.00417005	0.0230858
BnaC03g66590D	BnaC07g44240D	0.0918301	0.2325	0.394969	843	195.083	647.917	56	39	0.0864309	0.199915
BnaC01g04790D	BnaC07g44240D	0.0769292	0.311625	0.246865	951	217	734	53.6667	55.3333	0.0731153	0.254992
BnaA06g23250D	BnaC03g50060D	0.0109817	0.0391478	0.280518	996	262.167	733.833	8	10	0.0109017	0.0381437
BnaC01g04790D	BnaC03g66590D	0.0928091	0.288866	0.321288	843	192.917	650.083	56.75	46.25	0.0872965	0.239741
BnaC02g33030D	BnaC07g19810D	0.0284179	0.277828	0.102286	780	182.333	597.667	16.6667	42.3333	0.0278862	0.232176
BnaA06g35670D	BnaC07g19810D	0.00842942	0.0865513	0.0973923	780	183.5	596.5	5	15	0.00838223	0.0817439
BnaA09g02240D	BnaC02g37290D	0.0615936	0.311031	0.19803	873	221.917	651.083	38.5	56.5	0.0591322	0.2546
BnaA01g20660D	BnaC08g20810D	0.0616513	0.265951	0.231815	1038	252.333	785.667	46.5	56.5	0.0591854	0.22391
BnaA01g20660D	BnaC01g25860D	0.00254588	0.0280688	0.0907016	1041	254.083	786.917	2	7	0.00254157	0.02755
BnaC01g25860D	BnaC08g20810D	0.0643845	0.260837	0.246838	1038	251.917	786.083	48.5	55.5	0.0616983	0.220311
BnaA07g23450D	BnaA07g29460D	0.0367027	0.300573	0.122109	1080	256.417	823.583	29.5	63.5	0.0358191	0.247644
BnaA10g19500D	BnaC09g54550D	0.0258016	0.0699745	0.368729	786	194.583	591.417	15	13	0.0253628	0.0668094
BnaA09g21850D	BnaC09g24040D	0.00272263	0.0571915	0.0476056	972	236.083	735.917	2	13	0.0027177	0.0550653
BnaA10g19500D	BnaC02g05160D	0.0782236	0.382259	0.204635	786	193.667	592.333	44	58	0.0742825	0.299484
BnaA01g32160D	BnaC01g39080D	0	0	NaN	789	185.333	603.667	0	0	0	0
BnaA05g19460D	BnaC01g31810D	0.0527629	0.261921	0.201446	972	226.167	745.833	38	50	0.0509497	0.221076
BnaC01g01390D	BnaC07g46560D	0.187043	0.752451	0.248578	951	221.583	729.417	120.75	105.25	0.165543	0.474991
BnaA01g15230D	BnaC01g17990D	0.0251107	0.0165676	1.51565	750	183.083	566.917	14	3	0.024695	0.016386
BnaC01g17990D	BnaC07g40000D	0.0661789	0.284406	0.232692	750	181.667	568.333	36	43	0.0633431	0.236697
BnaC01g10300D	BnaC09g19870D	0.217599	2.83318	0.0768039	975	225.833	749.167	141.5	165.5	0.188877	0.732841
BnaA09g41210D	BnaC08g33770D	0.0148086	0.0644634	0.229722	993	242.833	750.167	11	15	0.0146634	0.0617708
BnaA09g29780D	BnaC05g50770D	0.00529278	0.0930343	0.0568906	987	228.583	758.417	4	20	0.00527415	0.0874954
BnaA06g35670D	BnaC02g33030D	0.0266367	0.304099	0.0875923	780	181.333	598.667	15.6667	45.3333	0.0261693	0.25
BnaA02g11200D	BnaC02g15500D	0.00551536	0.0628875	0.087702	960	232.083	727.917	4	14	0.00549513	0.0603232
BnaA03g53120D	BnaC07g45330D	0.00540195	0.0798009	0.0676929	855	204.75	650.25	3.5	15.5	0.00538255	0.0757021
BnaA03g43240D	BnaC01g10300D	0.145171	0.449111	0.32324	975	224.917	750.083	99	76	0.131985	0.337903
BnaA02g34060D	BnaA06g23250D	0.066	0.305559	0.215997	993	257	736	46.5	64.5	0.0631793	0.250973
BnaA01g15230D	BnaC07g40000D	0.0327285	0.282295	0.115937	930	227.417	702.583	22.5	53.5	0.0320247	0.235251

## Sheet: B. rapa and B. napus
Table S4 The gene duplication events and Ka/Ks values of Brassica rapa and Brassica napus
Seq_1	Seq_2	Ka	Ks	Ka_Ks	EffectiveLen	AverageS-sites	AverageN-sites	cN	cS	pN	pS
BnaA03g19490D	Bra016930	0.0495875	0.375714	0.131982	975	235.167	739.833	35.5	69.5	0.0479838	0.295535
BnaC04g47720D	Bra016930	0.012287	0.105598	0.116356	972	233.5	738.5	9	23	0.0121869	0.0985011
BnaA04g23960D	Bra016930	0.00679814	0.0396277	0.17155	972	233.167	738.833	5	9	0.00676743	0.038599
BnaC03g23360D	Bra016930	0.0493821	0.319038	0.154784	906	215.5	690.5	33	56	0.0477915	0.259861
BnaA01g00410D	Bra017830	0.0553204	0.268374	0.206132	747	175.083	571.917	30.5	39.5	0.0533294	0.225607
BnaC01g01400D	Bra017830	0.0610537	0.309096	0.197523	747	175.667	571.333	33.5	44.5	0.0586348	0.253321
BnaC07g46560D	Bra017830	0.0212278	0.0852845	0.248906	747	173.667	573.333	12	14	0.0209302	0.0806142
BnaA02g29220D	Bra025604	0.137465	0.5719	0.240365	951	242.417	708.583	89	97	0.125603	0.400138
BnaA04g09990D	Bra025604	0.00562722	0.0379028	0.148465	957	243.5	713.5	4	9	0.00560617	0.036961
BnaA09g57020D	Bra026207	0.0942718	0.466519	0.202075	699	170.333	528.667	46.8333	59.1667	0.0885876	0.347358
BnaC08g39510D	Bra026207	0.0256984	0.362702	0.0708527	942	229.5	712.5	18	66	0.0252632	0.287582
BnaC05g49640D	Bra026207	0.0070324	0.106992	0.0657281	945	230.667	714.333	5	23	0.00699953	0.099711
BnaC02g09190D	Bra020072	0.00756887	0.05501	0.137591	966	235.667	730.333	5.5	12.5	0.00753081	0.053041
BnaA10g15310D	Bra020072	0.0977778	0.315799	0.309621	966	231.5	734.5	67.3333	59.6667	0.0916723	0.257739
BnaC09g37740D	Bra020072	0.0820568	0.316012	0.259663	966	232.667	733.333	57	60	0.0777273	0.25788
BnaC02g42920D	Bra024267	0.0652508	0.296956	0.219732	993	256.917	736.083	46	63	0.0624929	0.245216
BnaC03g50060D	Bra024267	0.0109817	0.0391478	0.280518	996	262.167	733.833	8	10	0.0109017	0.0381437
BnaA02g34060D	Bra024267	0.066	0.305559	0.215997	993	257	736	46.5	64.5	0.0631793	0.250973
BnaC08g44110D	Bra032477	0.0490587	0.275467	0.178092	957	227	730	34.6667	52.3333	0.0474886	0.230543
BnaA10g03270D	Bra032477	0.0280472	0.313101	0.0895789	957	230.5	726.5	20	59	0.0275293	0.255965
BnaC05g03280D	Bra032477	0.0252301	0.266966	0.0945067	957	231.5	725.5	18	52	0.0248105	0.224622
BnaC02g07500D	Bra023639	0.0138035	0.105108	0.131328	924	229.417	694.583	9.5	22.5	0.0136773	0.0980748
BnaA03g06740D	Bra023639	0.0353526	0.221974	0.159265	924	229	695	24	44	0.0345324	0.19214
BnaC03g08610D	Bra023639	0.0368443	0.216491	0.170189	924	228.667	695.333	25	43	0.035954	0.188047
BnaA02g03720D	Bra023639	0.00433006	0.0221418	0.19556	924	229.167	694.833	3	5	0.00431758	0.0218182
BnaA01g20660D	Bra018006	0.0471823	0.331566	0.142301	1041	253.75	787.25	36	68	0.0457288	0.26798
BnaC08g20810D	Bra018006	0.0696266	0.221072	0.31495	1053	255.917	797.083	53	49	0.0664924	0.191469
BnaC01g25860D	Bra018006	0.0498653	0.302128	0.165047	1041	253.333	787.667	38	63	0.0482438	0.248684
BnaC08g22410D	Bra036842	0.0142985	0.0404896	0.353141	1005	228.333	776.667	11	9	0.0141631	0.0394161
BnaA09g31650D	Bra036842	0.00128935	0.0221828	0.0581241	1005	228.75	776.25	1	5	0.00128824	0.0218579
BnaA01g06830D	Bra024102	0.0361516	0.349022	0.10358	966	229.333	736.667	26	64	0.0352941	0.27907
BnaC07g42360D	Bra024102	0.00338754	0.047242	0.0717061	969	229.333	739.667	2.5	10.5	0.0033799	0.0457849
BnaC03g20530D	Bra023099	0.00132905	0.0400243	0.0332061	984	230.917	753.083	1	9	0.00132787	0.0389751
BnaC06g25550D	Bra004343	0.0432114	0.347125	0.124484	996	233.917	762.083	32	65	0.0419902	0.277877
BnaA07g27500D	Bra004343	0.00262582	0.104398	0.0251521	999	236	763	2	23	0.00262123	0.0974576
BnaC06g29700D	Bra004343	0.018585	0.133996	0.138698	999	236.333	762.667	14	29	0.0183566	0.122708
BnaA07g24420D	Bra004343	0.0438722	0.358527	0.122368	996	233.333	762.667	32.5	66.5	0.0426136	0.285
BnaA02g29220D	Bra039059	0.0579184	0.255663	0.226542	951	242.333	708.667	39.5	52.5	0.0557385	0.216644
BnaC09g01650D	Bra039059	0.00416861	0.0775439	0.053758	966	244.333	721.667	3	18	0.00415704	0.0736698
BnaC02g37290D	Bra039059	0.0582538	0.277736	0.209745	966	243.417	722.583	40.5	56.5	0.0560489	0.232112
BnaC01g40580D	Bra036445	0.00978123	0.0847295	0.115441	945	224.667	720.333	7	18	0.00971772	0.0801187
BnaA07g12740D	Bra012061	0.0255506	0.0332915	0.767483	930	220.083	709.917	17.8333	7.16667	0.0251203	0.0325634
BnaC09g08120D	Bra012061	0.0512543	0.373965	0.137056	930	220.167	709.833	35.1667	64.8333	0.0495421	0.294474
BnaA04g25090D	Bra037713	0.00131176	0.0042493	0.308701	999	236	763	1	1	0.00131062	0.00423729
BnaC04g48960D	Bra037713	0.038289	0.13706	0.27936	999	235.5	763.5	28.5	29.5	0.0373281	0.125265
BnaA05g34020D	Bra021488	0.0259797	0.252133	0.103039	951	226.5	724.5	18.5	48.5	0.0255349	0.214128
BnaC05g48680D	Bra021488	0.0288092	0.259478	0.111027	951	225.667	725.333	20.5	49.5	0.0282629	0.21935
BnaA08g28220D	Bra030607	0.0237711	0.13793	0.172342	990	242.083	747.917	17.5	30.5	0.0233983	0.12599
BnaA10g03270D	Bra015403	0.0945379	0.438038	0.215821	954	231.583	722.417	64.1667	76.8333	0.0888222	0.331774
BnaC05g03280D	Bra015403	0.0959892	0.406593	0.236082	954	232.583	721.417	65	73	0.0901005	0.313866
BnaC06g12560D	Bra028436	0.0169299	0.0537945	0.314715	948	231.167	716.833	12	12	0.0167403	0.0519106
BnaA09g57020D	Bra026822	0.0831534	0.137819	0.603353	621	150.917	470.083	37	19	0.0787094	0.125897
BnaC08g39510D	Bra026822	0.0131025	0.0569816	0.229942	864	209.583	654.417	8.5	11.5	0.0129887	0.0548708
BnaA10g03270D	Bra030606	0.142449	0.568555	0.250545	957	233.75	723.25	93.8333	93.1667	0.129738	0.398574
BnaC05g03280D	Bra030606	0.140993	0.538278	0.261934	957	234.75	722.25	92.8333	90.1667	0.128534	0.384097
BnaA09g05060D	Bra026470	0.0109105	0.0532571	0.204865	972	233.417	738.583	8	12	0.0108315	0.0514102
BnaC07g30370D	Bra026470	0.0432376	0.333215	0.129759	972	234.167	737.833	31	63	0.0420149	0.269039
BnaC09g04610D	Bra026470	0.0219771	0.0579137	0.37948	972	233.25	738.75	16	13	0.0216582	0.0557342
BnaA06g26600D	Bra026470	0.0496569	0.30544	0.162575	972	233.167	738.833	35.5	58.5	0.0480487	0.250893
BnaA03g47720D	Bra013943	0.0341794	0.264362	0.129291	930	226.667	703.333	23.5	50.5	0.0334123	0.222794
BnaA01g15230D	Bra013943	0.00285885	0.0266596	0.107235	930	229.083	700.917	2	6	0.00285341	0.0261913
BnaC07g40000D	Bra013943	0.0327007	0.270425	0.120924	930	226.833	703.167	22.5	51.5	0.0319981	0.227039
BnaA02g04550D	Bra002270	0.0643628	0.294366	0.218649	981	239.25	741.75	45.75	58.25	0.0616785	0.243469
BnaC09g37760D	Bra002270	0.0108098	0.0387044	0.279291	984	238.583	745.417	8	9	0.0107323	0.0377227
BnaA10g15320D	Bra002270	0.00268998	0.00419288	0.641559	984	239.167	744.833	2	1	0.00268516	0.00418118
BnaA02g34070D	Bra024269	0.0645946	0.304225	0.212325	975	247.917	727.083	45	62	0.0618911	0.250084
BnaC02g42930D	Bra024269	0.0624692	0.299453	0.208611	978	248.083	729.917	43.75	61.25	0.0599383	0.246893
BnaC08g43490D	Bra030706	0.0831142	0.373473	0.222544	750	171.667	578.333	45.5	50.5	0.0786744	0.294175
BnaC05g05550D	Bra030706	0.0770967	0.264011	0.292021	744	170.75	573.25	42	38	0.0732665	0.222548
BnaA09g49190D	Bra030706	0.0772825	0.404091	0.19125	750	171.25	578.75	42.5	53.5	0.0734341	0.312409
BnaC09g48850D	Bra009220	0.109314	0.59414	0.183987	1008	247.75	760.25	77.3333	101.667	0.101721	0.41036
BnaA10g24230D	Bra009220	0.114779	0.627751	0.182841	1008	246.917	761.083	81	105	0.106427	0.425245
BnaC09g50000D	Bra009105	0.00483873	0.130309	0.0371326	831	209	622	3	25	0.00482315	0.119617
BnaA03g55260D	Bra009105	0.184891	0.449277	0.41153	828	208.583	619.417	101.5	70.5	0.163864	0.337994
BnaC02g02350D	Bra009105	0.0623118	0.343095	0.181617	828	206.417	621.583	37.1667	56.8333	0.0597935	0.275333
BnaA02g07630D	Bra006769	0.16706	0.874884	0.190951	963	228.5	734.5	110	118	0.149762	0.516411
BnaA03g09760D	Bra006769	0.00364742	0.0467988	0.0779384	1089	264.5	824.5	3	12	0.00363857	0.0453686
BnaC02g10690D	Bra006769	0.170296	0.851906	0.199901	963	227.833	735.167	112	116	0.152346	0.509144
BnaC07g34540D	Bra040175	0.145659	0.449167	0.324286	975	223.417	751.583	99.5	75.5	0.132387	0.337934
BnaA01g08600D	Bra040175	0.00502199	0.0171559	0.292727	1035	235.833	799.167	4	4	0.00500521	0.0169611
BnaC01g10300D	Bra040175	0.00755357	0.0257905	0.292882	1035	236.667	798.333	6	6	0.00751566	0.0253521
BnaA03g43240D	Bra040175	0.141665	0.452787	0.312873	975	223.583	751.417	97	76	0.129089	0.339918
BnaC02g09490D	Bra020191	0.118777	0.216766	0.54795	984	228.417	755.583	83	43	0.109849	0.188252
BnaA09g07380D	Bra031832	0.100889	0.283304	0.356115	963	226.75	736.25	69.5	53.5	0.0943973	0.235943
BnaC02g16700D	Bra031832	0.0948251	0.158836	0.597001	873	207.833	665.167	59.25	29.75	0.0890754	0.143144
BnaC09g07300D	Bra031832	0.0993846	0.289247	0.343598	963	227.083	735.917	68.5	54.5	0.0930812	0.24
BnaC02g42920D	Bra031934	0.0177503	0.0839156	0.211526	993	251.917	741.083	13	20	0.0175419	0.0793913
BnaC03g50060D	Bra031934	0.0696358	0.286496	0.24306	993	256.167	736.833	49	61	0.0665008	0.238126
BnaA02g34060D	Bra031934	0.00677817	0.0365926	0.185233	993	252	741	5	9	0.00674764	0.0357143
BnaA06g23250D	Bra031934	0.0696523	0.309482	0.225061	993	256.333	736.667	49	65	0.0665158	0.253576
BnaC03g33490D	Bra001084	0.0150145	0.123209	0.121862	963	239.833	723.167	10.75	27.25	0.0148652	0.113621
BnaA02g02010D	Bra008775	0.0885723	0.436203	0.203053	792	193.5	598.5	50	64	0.0835422	0.330749
BnaC09g54550D	Bra008775	0.0258016	0.0699745	0.368729	786	194.583	591.417	15	13	0.0253628	0.0668094
BnaC02g05160D	Bra008775	0.0782236	0.382259	0.204635	786	193.667	592.333	44	58	0.0742825	0.299484
BnaA09g25570D	Bra023149	0.0103316	0.0320049	0.322814	1035	255.333	779.667	8	8	0.0102608	0.0313316
BnaA07g07020D	Bra023149	0.0738994	0.358262	0.206272	990	244	746	52.5	69.5	0.0703753	0.284836
BnaC07g08680D	Bra023149	0.0593907	0.331483	0.179167	1035	255.667	779.333	44.5	68.5	0.0571001	0.267927
BnaA09g25570D	Bra039872	0.059336	0.311299	0.190608	1014	248.583	765.417	43.6667	63.3333	0.0570495	0.254777
BnaC02g09190D	Bra002271	0.0814189	0.262095	0.310647	834	198.917	635.083	49	44	0.0771552	0.221198
BnaA10g15310D	Bra002271	0.00156801	0.00513042	0.305631	834	195.583	638.417	1	1	0.00156638	0.00511291
BnaC09g37740D	Bra002271	0.0110485	0.0154844	0.713522	834	195.75	638.25	7	3	0.0109675	0.0153257
BnaA02g04560D	Bra002271	0.0814189	0.29862	0.27265	834	198.917	635.083	49	49	0.0771552	0.246334
BnaA07g12740D	Bra037176	0.0228807	0.33466	0.06837	1005	235.833	769.167	17.3333	63.6667	0.0225352	0.269965
BnaC09g08120D	Bra037176	0.00652533	0.0665871	0.0979968	1005	235.417	769.583	5	15	0.00649702	0.0637168
BnaA02g24880D	Bra022090	0.00166067	0.0111838	0.148489	783	180.167	602.833	1	2	0.00165883	0.0111008
BnaC09g19870D	Bra022090	0.0348304	0.291334	0.119555	975	225.75	749.25	25.5	54.5	0.034034	0.241417
BnaC02g33030D	Bra022090	0.00499585	0.0168074	0.297241	783	180.5	602.5	3	3	0.00497925	0.0166205
BnaC02g15500D	Bra022567	0.00551536	0.0582165	0.0947389	960	232.083	727.917	4	13	0.00549513	0.0560144
BnaA02g02010D	Bra023449	0.0048358	0.0265682	0.182014	1098	268.167	829.833	4	7	0.00482024	0.0261032
BnaA10g19500D	Bra023449	0.0923415	0.489749	0.188549	786	193.25	592.75	51.5	69.5	0.0868832	0.359638
BnaC02g05160D	Bra023449	0.0316495	0.131971	0.239822	921	227.25	693.75	21.5	27.5	0.030991	0.121012
BnaA05g09700D	Bra005456	0.00416957	0.00888241	0.469419	948	226.5	721.5	3	2	0.004158	0.00883002
BnaC07g03670D	Bra039920	0.00908905	0.0547772	0.165928	1002	227.167	774.833	7	12	0.0090342	0.0528247
BnaA07g01880D	Bra039920	0.00258398	0.00887584	0.291125	1002	226.667	775.333	2	2	0.00257954	0.00882353
BnaC03g46570D	Bra013053	0.00461303	0.0348321	0.132436	858	205.667	652.333	3	7	0.00459888	0.0340357
BnaA03g53120D	Bra013053	0.114587	0.919779	0.124581	855	205.667	649.333	69	109	0.106263	0.529984
BnaC03g50050D	Bra024268	0.0108391	0.0539839	0.200784	993	249.583	743.417	8	13	0.0107611	0.0520868
BnaC08g43490D	Bra018677	0.0521873	0.386482	0.135031	759	173.833	585.167	29.5	52.5	0.050413	0.302013
BnaA06g04380D	Bra018677	0.00285647	0.0395805	0.0721685	909	207.5	701.5	2	8	0.00285103	0.0385542
BnaC05g05550D	Bra018677	0.00878359	0.0996799	0.0881179	744	171.417	572.583	5	16	0.00873235	0.0933398
BnaA09g49190D	Bra018677	0.0458564	0.417689	0.109786	753	172.25	580.75	25.8333	55.1667	0.0444827	0.320271
BnaC05g36360D	Bra022195	0.00916542	0.0932118	0.098329	1008	239.583	768.417	7	21	0.00910964	0.0876522
BnaA04g21990D	Bra000058	0.072632	0.307866	0.235921	1044	249.5	794.5	55	63	0.0692259	0.252505
BnaA01g36520D	Bra023862	0.0013292	0.0177523	0.0748747	981	228	753	1	4	0.00132802	0.0175439
BnaA05g19460D	Bra023862	0.0542028	0.274566	0.197412	972	226.167	745.833	39	52	0.0522905	0.229919
BnaC01g31810D	Bra023862	0.0039938	0.049905	0.0800279	981	227.833	753.167	3	11	0.00398318	0.0482809
BnaA01g03170D	Bra011475	0.0100039	0.0570346	0.1754	1197	291.333	905.667	9	16	0.00993743	0.0549199
BnaC01g04440D	Bra011475	0.0460197	0.116183	0.396098	1200	292.667	907.333	40.5	31.5	0.0446363	0.107631
BnaA09g41210D	Bra007831	0.00803938	0.0781052	0.10293	993	242.667	750.333	6	18	0.00799645	0.0741758
BnaC08g33770D	Bra007831	0.00938769	0.055581	0.168901	993	242.667	750.333	7	13	0.00932919	0.0535714
BnaC01g02300D	Bra017761	0.0384743	0.245232	0.156889	987	227.083	759.917	28.5	47.5	0.0375041	0.209174
BnaC07g51170D	Bra017761	0.0106657	0.0843651	0.126423	981	225.583	755.417	8	18	0.0105902	0.0797931
BnaA01g01260D	Bra017761	0.0787381	0.418668	0.188068	987	224.417	762.583	57	72	0.0747459	0.320832
BnaC06g32660D	Bra003918	0.0341497	0.324496	0.105239	1080	256.25	823.75	27.5	67.5	0.0333839	0.263415
BnaA07g29460D	Bra003918	0.0367027	0.300573	0.122109	1080	256.417	823.583	29.5	63.5	0.0358191	0.247644
BnaA03g53120D	Bra017686	0.00463322	0.0247343	0.18732	855	205.5	649.5	3	5	0.00461894	0.0243309
BnaC07g45330D	Bra017686	0.00694896	0.0637868	0.10894	855	204.417	650.583	4.5	12.5	0.00691687	0.0611496
BnaC04g34810D	Bra038526	0.0354181	0.349912	0.10122	933	215.167	717.833	24.8333	60.1667	0.0345948	0.279628
BnaA04g12860D	Bra038526	0.0368493	0.343719	0.107208	933	214.583	718.417	25.8333	59.1667	0.0359587	0.275728
BnaA09g42650D	Bra038526	0.00417683	0.0429199	0.0973168	936	215.75	720.25	3	9	0.00416522	0.0417149
BnaC08g35130D	Bra038526	0.00837997	0.0577208	0.145181	936	216	720	6	12	0.00833333	0.0555556
BnaA02g34070D	Bra031933	0.00283487	0.0167722	0.169022	948	241.167	706.833	2	4	0.00282952	0.016586
BnaC02g42930D	Bra031933	0.0142252	0.0694137	0.204933	951	241.333	709.667	10	16	0.0140911	0.0662983
BnaC08g43490D	Bra031598	0.0239824	0.0802932	0.298685	759	172.917	586.083	13.8333	13.1667	0.023603	0.0761446
BnaA06g04380D	Bra031598	0.0454929	0.402964	0.112896	759	173.75	585.25	25.8333	54.1667	0.0441407	0.311751
BnaC05g05550D	Bra031598	0.0339445	0.388483	0.0873769	744	171.5	572.5	19	52	0.0331878	0.303207
BnaC04g47720D	Bra000228	0.0533871	0.339141	0.157418	972	234.583	737.417	38	64	0.0515312	0.272824
BnaA04g23960D	Bra000228	0.0497323	0.343117	0.144943	972	234.25	737.75	35.5	64.5	0.0481193	0.275347
BnaC03g23360D	Bra000228	0.00655662	0.0803035	0.081648	906	216.667	689.333	4.5	16.5	0.00652805	0.0761538
BnaC04g09760D	Bra005346	0.0122258	0.149874	0.0815734	963	220.833	742.167	9	30	0.0121267	0.135849
BnaA03g51170D	Bra024033	0.00454252	0.0139539	0.325538	1026	253.167	772.833	3.5	3.5	0.00452879	0.0138249
BnaC09g01650D	Bra033040	0.0594298	0.273503	0.217291	951	242.167	708.833	40.5	55.5	0.0571361	0.229181
BnaC02g37290D	Bra033040	0.0112983	0.100919	0.111955	957	243.583	713.417	8	23	0.0112136	0.0944235
BnaA09g02240D	Bra033040	0.0607948	0.284357	0.213797	864	221.833	642.167	37.5	52.5	0.0583961	0.236664
BnaC01g21870D	Bra033551	0.0164564	0.06068	0.271199	1056	257.333	798.667	13	15	0.0162771	0.0582902
BnaA01g17520D	Bra033551	0.0050283	0.0236395	0.212708	1056	257.833	798.167	4	6	0.00501149	0.0232708
BnaC09g50000D	Bra005850	0.188093	0.483068	0.389372	966	238.667	727.333	121	85	0.166361	0.356145
BnaC02g02350D	Bra005850	0.205269	0.481232	0.426548	966	236.5	729.5	131	84	0.179575	0.35518
BnaA10g25070D	Bra005850	0.19564	0.481076	0.406671	966	238.667	727.333	125.25	84.75	0.172204	0.355098
BnaC03g02110D	Bra005850	0.0466245	0.048112	0.969084	966	237.833	728.167	32.9167	11.0833	0.0452049	0.0466013
BnaA07g27500D	Bra038345	0.0452585	0.387541	0.116784	999	236.25	762.75	33.5	71.5	0.04392	0.302646
BnaC06g29700D	Bra038345	0.0466735	0.386827	0.120657	999	236.583	762.417	34.5	71.5	0.0452508	0.302219
BnaC02g18660D	Bra038345	0.00924918	0.0752288	0.122947	999	237.5	761.5	7	17	0.00919238	0.0715789
BnaA07g33290D	Bra008291	0.0923796	0.320583	0.288161	951	220.417	730.583	63.5	57.5	0.0869168	0.26087
BnaC06g37840D	Bra008291	0.09855	0.335266	0.293946	951	220.083	730.917	67.5	59.5	0.0923498	0.270352
BnaA03g52510D	Bra034561	0.0945253	0.223162	0.423572	930	215	715	63.5	41.5	0.0888112	0.193023
BnaA08g11780D	Bra034561	0.001396	0.00944894	0.147741	930	213	717	1	2	0.0013947	0.00938967
BnaC07g44240D	Bra034561	0.098502	0.232616	0.423453	930	215	715	66	43	0.0923077	0.2
BnaC03g66590D	Bra034561	0.0061856	0.0156527	0.395177	843	193.667	649.333	4	3	0.00616016	0.0154905
BnaC01g04790D	Bra034561	0.100198	0.286697	0.349493	930	213	717	67.25	50.75	0.0937936	0.238263
BnaC09g50000D	Bra028761	0.0636778	0.351291	0.181268	966	237.083	728.917	44.5	66.5	0.0610495	0.280492
BnaA03g55260D	Bra028761	0.205242	0.48147	0.426282	966	236.417	729.583	131	84	0.179555	0.355305
BnaC02g02350D	Bra028761	0.00687054	0.0667354	0.102952	966	234.917	731.083	5	15	0.00683917	0.0638524
BnaA10g25070D	Bra028761	0.0654222	0.330253	0.198098	966	237.083	728.917	45.6667	63.3333	0.0626501	0.267135
BnaA02g07630D	Bra020370	0.00139535	0.0506327	0.0275583	942	224.667	717.333	1	11	0.00139405	0.0489614
BnaA03g09760D	Bra020370	0.173212	0.901216	0.192198	948	228.167	719.833	111.333	119.667	0.154665	0.52447
BnaC02g10690D	Bra020370	0.00629374	0.102704	0.0612805	942	224	718	4.5	21.5	0.00626741	0.0959821
BnaA06g16160D	Bra018007	0.00376885	0.00788444	0.478012	1053	255	798	3	2	0.0037594	0.00784314
BnaC07g05770D	Bra001986	0.0027504	0.0282386	0.0973986	945	216.5	728.5	2	6	0.00274537	0.0277136
BnaA10g03290D	Bra015404	0.0013624	0.0127482	0.10687	972	237.333	734.667	1	3	0.00136116	0.0126404
BnaC05g03300D	Bra015404	0.0150948	0.0258739	0.5834	972	235.917	736.083	11	6	0.014944	0.0254327
BnaC08g44140D	Bra015404	0.0235069	0.224144	0.104874	972	237.417	734.583	17	46	0.0231424	0.193752
BnaA03g54060D	Bra011771	0.0587645	0.245938	0.23894	972	228.917	743.083	42	48	0.0565213	0.209683
BnaC01g01400D	Bra011771	0.00951423	0.142213	0.0669014	972	231.583	740.417	7	30	0.00945414	0.129543
BnaC07g46560D	Bra011771	0.0646392	0.221692	0.291572	972	229.25	742.75	46	44	0.061932	0.19193
BnaA01g03520D	Bra037007	0.0740723	0.315706	0.234624	906	208.917	697.083	49.1667	53.8333	0.070532	0.257678
BnaA03g52510D	Bra037007	0.00288116	0.0143889	0.200234	906	210.5	695.5	2	3	0.00287563	0.0142518
BnaA08g11780D	Bra037007	0.0938843	0.243676	0.385283	906	209.083	696.917	61.5	43.5	0.0882458	0.208051
BnaC07g44240D	Bra037007	0.0101328	0.085448	0.118585	906	210.5	695.5	7	17	0.0100647	0.0807601
BnaC01g04790D	Bra037007	0.074063	0.323195	0.229159	906	208.833	697.167	49.1667	54.8333	0.0705235	0.26257
BnaA09g05060D	Bra009728	0.0414313	0.304225	0.136186	1017	247.917	769.083	31	62	0.0403077	0.250084
BnaC07g30370D	Bra009728	0.0118113	0.024492	0.482251	1017	249	768	9	6	0.0117188	0.0240964
BnaC09g04610D	Bra009728	0.0462458	0.319776	0.144619	1017	247.75	769.25	34.5	64.5	0.0448489	0.260343
BnaC05g50770D	Bra024635	0.00529278	0.0930343	0.0568906	987	228.583	758.417	4	20	0.00527415	0.0874954
BnaA02g02520D	Bra008715	0.0675474	0.330349	0.204472	981	230.167	750.833	48.5	61.5	0.0645949	0.267198
BnaC02g05920D	Bra008715	0.0660454	0.285287	0.231505	981	229.667	751.333	47.5	54.5	0.0632209	0.2373
BnaC05g19990D	Bra008715	0.00671446	0.0129873	0.517	981	233	748	5	3	0.00668449	0.0128755
BnaA01g03520D	Bra011438	0.0101012	0.0444941	0.227023	906	208.333	697.667	7	9	0.0100334	0.0432
BnaA03g52510D	Bra011438	0.0710189	0.258053	0.275211	906	209.917	696.083	47.1667	45.8333	0.0677601	0.218341
BnaA08g11780D	Bra011438	0.0917726	0.266394	0.3445	906	208.5	697.5	60.25	46.75	0.0863799	0.224221
BnaC07g44240D	Bra011438	0.0749775	0.28195	0.265925	906	209.917	696.083	49.6667	49.3333	0.0713516	0.235014
BnaC01g04790D	Bra011438	0.011554	0.108296	0.106689	906	208.25	697.75	8	21	0.0114654	0.10084
BnaC04g34810D	Bra030241	0.0106966	0.031383	0.340839	981	227.75	753.25	8	7	0.0106206	0.0307355
BnaA04g12860D	Bra030241	0.00934384	0.0178182	0.524398	981	227.167	753.833	7	4	0.00928587	0.0176082
BnaA09g42650D	Bra030241	0.0399524	0.338989	0.117858	936	216.333	719.667	28	59	0.0389069	0.272727
BnaC08g35130D	Bra030241	0.0492822	0.335414	0.146929	984	229.25	754.75	36	62	0.0476979	0.270447
BnaC08g44110D	Bra015402	0.0596632	0.35362	0.168721	957	227.583	729.417	41.8333	64.1667	0.0573518	0.281948
BnaC09g25420D	Bra037877	0.0137175	0.0515778	0.265958	1050	240.75	809.25	11	12	0.0135928	0.0498442
BnaC03g28220D	Bra037877	0.0536	0.462877	0.115797	1044	241.75	802.25	41.5	83.5	0.0517295	0.345398
BnaA08g02580D	Bra014200	0.00478996	0.019238	0.248984	1101	263.25	837.75	4	5	0.00477469	0.0189934
BnaC08g02790D	Bra014200	0.0256551	0.0624432	0.410855	987	233.667	753.333	19	14	0.0252212	0.0599144
BnaA06g16150D	Bra029933	0.0532535	0.299423	0.177854	1041	253.167	787.833	40.5	62.5	0.0514068	0.246873
BnaA01g20660D	Bra029933	0.00509935	0.0488142	0.104464	1041	253.917	787.083	4	12	0.00508205	0.0472596
BnaC08g20810D	Bra029933	0.0678428	0.263862	0.257115	1038	251.75	786.25	51	56	0.0648649	0.222443
BnaC01g25860D	Bra029933	0.00765801	0.0446984	0.171326	1041	253.5	787.5	6	11	0.00761905	0.0433925
BnaC05g48680D	Bra039137	0.00693486	0.0888889	0.0780171	951	226.667	724.333	5	19	0.0069029	0.0838235
BnaA07g33560D	Bra015668	0.00304234	0.0895348	0.0339794	1308	319.917	988.083	3	27	0.00303618	0.084397
BnaC06g38150D	Bra015668	0.0112572	0.119231	0.0944157	1302	317.5	984.5	11	35	0.0111732	0.110236
BnaA02g24880D	Bra024972	0.0229187	0.32095	0.0714092	780	181.917	598.083	13.5	47.5	0.0225721	0.261109
BnaC07g19810D	Bra024972	0.00505407	0.0983593	0.0513837	780	184.417	595.583	3	17	0.00503708	0.0921826
BnaC02g33030D	Bra024972	0.0266783	0.318817	0.083679	780	182.25	597.75	15.6667	47.3333	0.0262094	0.259717
BnaA06g35670D	Bra024972	0.006735	0.0334473	0.201362	780	183.417	596.583	4	6	0.00670485	0.0327124
BnaC09g37760D	Bra020071	0.06431	0.282927	0.227303	981	238.667	742.333	45.75	56.25	0.06163	0.235684
BnaA10g15320D	Bra020071	0.0673066	0.288203	0.233539	981	239.25	741.75	47.75	57.25	0.0643748	0.239289
BnaC05g48680D	Bra023509	0.174186	0.936126	0.186071	948	223.167	724.833	112.667	119.333	0.155438	0.534727
BnaC02g05920D	Bra023509	0.0120056	0.0931428	0.128894	984	228.333	755.667	9	20	0.01191	0.0875912
BnaC05g19990D	Bra023509	0.071949	0.323338	0.22252	981	230.333	750.667	51.5	60.5	0.0686057	0.262663
BnaC08g44120D	Bra032476	0.07278	0.096718	0.752496	954	225.917	728.083	50.5	20.5	0.0693602	0.0907414
BnaA04g21990D	Bra017121	0.00314664	0.0351062	0.089632	1044	247.833	796.167	2.5	8.5	0.00314005	0.0342972
BnaC04g56590D	Bra017121	0.00251836	0.0245421	0.102614	1044	248.5	795.5	2	6	0.00251414	0.0241449
BnaA09g25570D	Bra014895	0.0572657	0.360434	0.15888	1035	255.083	779.917	43	73	0.0551341	0.286181
BnaA07g07020D	Bra014895	0.0236799	0.0397721	0.59539	996	245.25	750.75	17.5	9.5	0.02331	0.038736
BnaC07g08680D	Bra014895	0.00764257	0.060537	0.126246	1047	257.917	789.083	6	15	0.00760376	0.0581583
BnaC01g31810D	Bra031309	0.0527629	0.261921	0.201446	972	226.167	745.833	38	50	0.0509497	0.221076
BnaC01g17910D	Bra013938	0.0179298	0.132817	0.134997	972	238.25	733.75	13	29	0.0177172	0.121721
BnaA01g15150D	Bra013938	0.00272883	0.0432864	0.0630411	972	237.75	734.25	2	10	0.00272387	0.042061
BnaC03g20530D	Bra017206	0.0353446	0.261614	0.135102	984	230.917	753.083	26	51	0.0345247	0.220859
BnaA03g17000D	Bra017206	0.0339348	0.274589	0.123584	984	230.5	753.5	25	53	0.0331785	0.229935
BnaC09g07300D	Bra037849	0.00402056	0.0487977	0.0823924	981	232.833	748.167	3	11	0.0040098	0.0472441
BnaC09g24040D	Bra035235	0.00272264	0.0571915	0.0476056	972	236.083	735.917	2	13	0.0027177	0.0550653
BnaC02g07500D	Bra006423	0.0241219	0.162798	0.148171	924	228.917	695.083	16.5	33.5	0.0237382	0.146341
BnaC03g08610D	Bra006423	0.00432382	0.0451604	0.0957436	924	228.167	695.833	3	10	0.00431138	0.0438276
BnaA02g03720D	Bra006423	0.0338293	0.199182	0.169841	924	228.667	695.333	23	40	0.0330777	0.174927
BnaA10g03290D	Bra032474	0.0218822	0.279311	0.0783438	855	205.833	649.167	14	48	0.0215661	0.233198
BnaC05g03300D	Bra032474	0.0346019	0.29604	0.116882	855	204.417	650.583	22	50	0.0338158	0.244598
BnaC08g44140D	Bra032474	0.00463501	0.12105	0.0382901	855	205.75	649.25	3	23	0.00462072	0.111786
BnaA03g47720D	Bra019132	0.00284091	0.031823	0.0892724	930	224.667	705.333	2	7	0.00283554	0.0311573
BnaA01g15230D	Bra019132	0.031228	0.289247	0.107963	930	227.083	702.917	21.5	54.5	0.0305868	0.24
BnaC07g40000D	Bra019132	0.00426642	0.060171	0.070905	930	224.833	705.167	3	13	0.00425431	0.0578206
BnaA02g18580D	Bra015695	0.101344	0.310731	0.326146	1002	231.917	770.083	73	59	0.0947949	0.254402
BnaA07g33290D	Bra015695	0.011463	0.00954258	1.20125	1005	228.5	776.5	8.83333	2.16667	0.0113758	0.00948213
BnaC06g37840D	Bra015695	0.0143047	0.0404289	0.353824	1005	228.667	776.333	11	9	0.0141692	0.0393586
BnaC06g32660D	Bra016127	0.00487015	0.0825007	0.0590316	1080	256	824	4	20	0.00485437	0.078125
BnaA07g23450D	Bra016127	0.0367027	0.300573	0.122109	1080	256.417	823.583	29.5	63.5	0.0358191	0.247644
BnaC06g25550D	Bra004014	0.0105369	0.0583909	0.180454	996	231.417	764.583	8	13	0.0104632	0.0561757
BnaA07g27500D	Bra004014	0.0473023	0.370678	0.12761	996	232.5	763.5	35	68	0.0458415	0.292473
BnaC06g29700D	Bra004014	0.0501202	0.384194	0.130456	996	232.833	763.167	37	70	0.0484822	0.300644
BnaA07g24420D	Bra004014	0.00261838	0.00871469	0.300455	996	230.833	765.167	2	2	0.00261381	0.00866426
BnaA01g06830D	Bra011170	0.00135839	0.00877845	0.154741	966	229.167	736.833	1	2	0.00135716	0.00872727
BnaC07g42360D	Bra011170	0.0396568	0.327186	0.121206	966	228.167	737.833	28.5	60.5	0.0386266	0.265157
BnaA08g28220D	Bra032475	0.134549	0.262507	0.512554	939	227.25	711.75	87.6667	50.3333	0.123171	0.221489
BnaC08g44130D	Bra032475	0.096424	0.215274	0.447912	939	228	711	64.3333	42.6667	0.0904829	0.187135
BnaA01g01260D	Bra011683	0.0328595	0.162117	0.20269	2163	470.417	1692.58	54.4167	68.5833	0.0321501	0.145793
BnaA02g11200D	Bra028285	0.0445203	0.492527	0.0903917	960	231.25	728.75	31.5	83.5	0.0432247	0.361081
BnaC02g15500D	Bra028285	0.0423343	0.44823	0.0944477	960	231.167	728.833	30	78	0.0411617	0.337419
BnaC03g21830D	Bra000113	0.016232	0.102303	0.158666	1071	261.417	809.583	13	25	0.0160576	0.0956328
BnaA03g18320D	Bra000113	0.0137033	0.0981323	0.139641	1071	260.917	810.083	11	24	0.0135788	0.0919834
