# Supplementary material for: Genome-Wide Identification and Analysis of the Ascorbate Peroxidase (APX) Gene Family of Winter Rapeseed (Brassica rapa L.) Under Abiotic Stress
Source: Front Genet. 2022 Jan 21;12:753624. doi: 10.3389/fgene.2021.753624 (PMC8814366; doi:10.3389/fgene.2021.753624)
Supplement: Supplementary file 8 [file Table5.XLSX]

## Sheet:  B.rapa at 4℃
Table S5 Log2 means of FPKM of different cold-resistant varieties in RNA-seq under cold stress for BrAPXs and BnAPXs
Gene_id	Longyou-7_cold_3 h	Longyou-7_cold_24 h	Lenox_cold_3 h	Lenox_cold_24 h
Bra000058	-0.871484	-0.0840219	0.121126	-0.323445
Bra000059	1.08117	-0.300845	1.6302	-0.0488228
Bra000113	0	0	0	0
Bra000228	-1.71828	0	0	-0.769729
Bra001084	1.21445	1.92035	0.786722	-0.00518382
Bra001986	-0.734618	-1.39156	-1.78645	0.225373
Bra002269	1.8826	0.817819	-0.342296	-3.98644
Bra002270	-0.345263	-0.010649	-1.12839	-3.59857
Bra002271	0	0.0105092	0	0
Bra003918	2.504	3.18151	0.674106	0.736198
Bra004014	-0.733888	1.72627	-1.31028	2.12241
Bra004343	-1.08415	-0.323391	-0.598938	0.238485
Bra005346	-1.12723	-0.213014	0.16839	0.820261
Bra005456	0	0	0	0
Bra005458	0	0	0	0
Bra005850	0	0	0	0
Bra006423	0	0	0	0
Bra006769	-1.29884	-2.07026	-0.173633	-0.105022
Bra007831	0.597303	1.43411	-1.12488	-0.717271
Bra008291	0	0	0	0
Bra008715	0.545135	1.52036	1.71534	1.57339
Bra008775	-0.579457	-0.855213	0.0161238	-0.732956
Bra009105	0.312107	-0.00672885	0.548712	-0.83647
Bra009220	-0.0147073	-0.241775	0.288447	-1.45971
Bra009221	0.416409	0.0776092	1.03266	-0.251201
Bra009728	-1.09828	0	0	0.291697
Bra011170	0.75293	-0.214037	-0.918118	-1.62691
Bra011438	-1.53231	-3.21674	-1.87946	-3.71481
Bra011475	-1.69661	-1.39496	-0.816602	-0.9924
Bra011681	-0.107586	-1.83066	-0.651345	-1.60402
Bra011683	-1.22556	-2.0206	-0.0466187	-1.21704
Bra011771	-0.858211	-2.15652	-1.0945	-1.97502
Bra012061	1.2447	2.13416	1.97069	3.47265
Bra013053	-0.384737	-0.0983493	-1.00348	-0.715926
Bra013576	-0.287226	-0.789707	0.926349	0.550183
Bra013938	0	0	0	0
Bra013943	0	0	0	0
Bra014200	0.031534	-0.122739	0	0
Bra014895	0	0	0	0
Bra015402	0	0	0	0
Bra015403	2.36281	-0.967979	-0.076926	-1.58795
Bra015404	-0.709292	-1.13825	-0.97799	-0.718505
Bra015668	-0.263318	-1.20721	-0.505282	-1.01044
Bra015695	0	0	0.394631	0.230271
Bra016127	1.39083	0.700032	0.685066	-0.32672
Bra016930	0.424179	-2.5996	0.815264	-1.04815
Bra017120	1.72215	2.4406	0.643232	0.342384
Bra017121	-0.574513	-0.458283	0.334548	0.485155
Bra017206	1.25954	-1.66101	-0.831988	-0.578985
Bra017686	0.122088	0.68058	0.120438	0.723209
Bra017761	-0.618659	-0.944117	-0.0470624	0.142426
Bra017830	0.00362114	-1.17347	-0.508055	-1.91285
Bra018006	0.88795	0.827736	0.691249	0.909477
Bra018007	1.15381	-1.25994	0.679569	-2.72066
Bra018677	0.143098	0.557991	0.40071	0.114018
Bra019131	-0.672957	-2.69817	0	-0.882019
Bra019132	0	0	0	0
Bra020071	-0.0420351	0	0	-0.398726
Bra020072	0	0	0	0
Bra020191	0	0	0	0
Bra020370	-0.592784	-2.45319	-0.802975	-2.67297
Bra021488	1.162	0.364981	0.583521	-1.64066
Bra022090	0	0	0	0
Bra022195	1.25539	2.13518	-0.679722	0.400553
Bra022567	1.07002	0.990143	-1.13089	-1.26207
Bra023099	-0.177189	-0.814017	-1.05884	-0.14867
Bra023149	0	0	0	0
Bra023449	-1.65211	-0.727275	-0.309378	-0.135343
Bra023509	-1.82627	-0.125058	-1.54622	0
Bra023639	-0.725499	-3.40621	-0.626103	-0.797527
Bra023862	0.835074	-0.943953	-0.0860352	-0.822311
Bra024033	1.50069	-0.588999	0.0591662	-0.439309
Bra024102	0.656107	-0.772902	-0.796206	-2.32232
Bra024267	0.508849	0.768416	-0.246846	-2.03948
Bra024268	1.10315	1.65263	-0.0513799	0.105425
Bra024269	0.0381081	-1.54078	1.49903	0.1766
Bra024635	0	0	0	0
Bra024972	-1.3205	-1.36153	-0.505799	-0.584335
Bra025604	-0.117741	-0.976029	-1.12167	-2.76338
Bra026207	-1.36767	-0.177355	-0.247803	-1.7083
Bra026470	0	0.92512	2.38461	1.91971
Bra026822	2.64747	2.0815	2.43219	0
Bra028285	1.1372	-0.619082	-1.02632	0.392188
Bra028436	0.92728	-0.768665	-0.215483	-2.58435
Bra028761	0.247688	1.91582	0.302231	0.265994
Bra029933	0.299052	0.743091	0.571485	0.191098
Bra030241	0.868726	-0.736606	-1.05591	-1.61975
Bra030606	0	0	0	0
Bra030607	0	0	0	0
Bra030706	0	0	-0.633415	0.222637
Bra031309	-0.72949	0.0995147	-0.0214634	0.435273
Bra031598	0.181299	0.831064	0.448434	0.497855
Bra031832	0	0	0	0
Bra031933	0.805597	1.4504	0.754109	-1.24588
Bra031934	1.61998	0.815938	0.291583	-2.46981
Bra032474	-1.15059	-0.755715	-0.0171451	0.792956
Bra032475	0	0	0	0
Bra032476	0	0	0	0
Bra032477	0	0	0	0
Bra033040	1.8823	0.786906	0.0114353	-1.51486
Bra033551	0	0	0	0
Bra034561	-2.61276	-1.15839	-1.4311	-1.41349
Bra035235	2.91114	0.360514	0.0639548	-2.69276
Bra036330	0.957965	0	0	0
Bra036445	0	0	0	0
Bra036842	0	0	0	0
Bra037007	0.20563	-1.12152	-2.03919	-4.66274
Bra037176	0	0	0	0
Bra037713	0	0	0	0
Bra037849	-0.556218	-0.0204911	0.375827	-1.37731
Bra037877	0.70873	-0.184773	-0.453976	-1.6356
Bra038345	-0.915954	-1.00205	0.354172	0.922145
Bra038526	-0.478201	-2.12049	-0.338133	0.28549
Bra039059	1.05222	-0.907977	-0.46545	-2.66106
Bra039137	0	0	0	0
Bra039872	0	0	0.283658	1.19263
Bra039920	-0.448172	-0.545022	-0.579158	-0.907572
Bra040175	0	0	1.42817	2.24934

## Sheet:  B.rapa at -4℃
Table S5 Log2 means of FPKM of different cold-resistant varieties in RNA-seq under freezing stress for BrAPXs and BnAPXs
Gene_id	Longyou-7_freezing_6 h	Tianyou-2_freezing_6 h
Bra000058	-4.30627	-3.83821
Bra000059	-8.61222	-5.26963
Bra000113	0	-0.214584
Bra000228	1.91157	1.07122
Bra001084	2.21927	3.01473
Bra001986	-2.96965	-3.13798
Bra002269	-6.37484	0
Bra002270	-2.96478	0
Bra002271	0	-3.25466
Bra003918	-1.60939	-0.456952
Bra004014	0	2.10522
Bra004343	-3.6318	-4.3914
Bra005346	-2.00074	-1.79371
Bra005456	0	0
Bra005458	0	0
Bra005850	0	0
Bra006423	0	0
Bra006769	-2.58833	-1.36296
Bra007831	0	0
Bra008291	0	0
Bra008715	1.95885	-0.404042
Bra008775	-6.44773	-4.62682
Bra009105	-5.39473	-3.25
Bra009220	2.75315	2.90878
Bra009221	1.31281	0.0787925
Bra009728	0	0
Bra011170	-0.696622	-2.32059
Bra011438	-4.0887	-2.29701
Bra011475	0.244281	0
Bra011681	-3.50234	-2.41095
Bra011683	-3.35449	-3.08824
Bra011771	-6.34269	-3.29488
Bra012061	-2.94108	-1.94812
Bra013053	-1.40472	-2.33527
Bra013576	-2.22805	-1.09215
Bra013938	0	5.89924
Bra013943	0	0
Bra014200	0	-1.84171
Bra014895	0.681836	0.188039
Bra015402	0	0
Bra015403	0	0
Bra015404	0	0
Bra015668	-1.69417	-1.7695
Bra015695	0	-0.307286
Bra016127	-4.79	-3.3797
Bra016930	0.360533	-2.43304
Bra017120	-0.868097	-0.977036
Bra017121	-2.32403	-3.0136
Bra017206	-0.21735	-2.47594
Bra017686	0.121494	0.119574
Bra017761	-2.29939	-2.61239
Bra017830	-3.9802	-3.63861
Bra018006	-3.04439	-1.48748
Bra018007	0	-3.68361
Bra018677	0.384572	0.524897
Bra019131	-1.25204	0
Bra019132	0	0
Bra020071	0	0
Bra020072	0	1.8827
Bra020191	0	0
Bra020370	-6.79899	-4.19333
Bra021488	0	0
Bra022090	0	0
Bra022195	0	0
Bra022567	0	-2.88289
Bra023099	-5.19116	-1.2222
Bra023149	-1.19331	-1.96681
Bra023449	-1.23772	-3.82941
Bra023509	-2.09591	0
Bra023639	0.110497	0
Bra023862	-3.74391	-4.38029
Bra024033	-1.97199	0.643731
Bra024102	-4.33549	-3.49883
Bra024267	2.2452	0.580011
Bra024268	-6.29355	0
Bra024269	-4.06273	-0.57583
Bra024635	0	0
Bra024972	1.55504	3.0447
Bra025604	-3.94237	-2.52139
Bra026207	0	0
Bra026470	2.12332	4.83667
Bra026822	0	-0.326642
Bra028285	-1.47385	-3.10995
Bra028436	0	0
Bra028761	2.244	1.45942
Bra029933	-2.27843	-2.41278
Bra030241	0	-1.08851
Bra030606	0	0
Bra030607	0	0
Bra030706	5.64213	-1.18776
Bra031309	-1.11296	-0.596226
Bra031598	0.0286122	0.0335097
Bra031832	0	0
Bra031933	-2.40992	1.10471
Bra031934	-7.1325	0
Bra032474	0	0
Bra032475	0	0
Bra032476	0	0
Bra032477	0	0
Bra033040	-1.45319	-0.681566
Bra033551	0	0
Bra034561	-4.25498	0
Bra035235	0	0
Bra036330	0	0
Bra036445	0	0
Bra036842	0	0
Bra037007	0.161126	-1.69603
Bra037176	0	0
Bra037713	0	0
Bra037849	-2.47389	-3.80184
Bra037877	-5.47955	-3.07406
Bra038345	-3.31905	-3.46524
Bra038526	-2.35068	-1.92564
Bra039059	-5.14102	-2.32805
Bra039137	0	0
Bra039872	0.0639129	1.29343
Bra039920	1.05971	-0.932761
Bra040175	4.18643	0

## Sheet: B. napus at 4℃
Table S5 Log2 means of FPKM of different cold-resistant varieties in RNA-seq under cold stress for BrAPXs and BnAPXs
Gene_id	NTS-309_cold_24 h	Tianyou-2238_cold_24 h
BnaA01g00410D	-0.53953	0.224934
BnaA01g01260D	0	0
BnaA01g01280D	9.71549	7.64863
BnaA01g01600D	-0.229063	-1.88809
BnaA01g03170D	-6.48805	-7.98459
BnaA01g03180D	0	-8.1792
BnaA01g03520D	0.203086	3.12289
BnaA01g06830D	0.720577	-5.79012
BnaA01g08600D	0	0
BnaA01g11800D	-0.913608	1.35009
BnaA01g15150D	-1.32657	0.209688
BnaA01g15230D	0	0
BnaA01g17520D	0	0
BnaA01g20660D	-1.07532	1.55666
BnaA01g32160D	-0.237151	0
BnaA01g34030D	0	0
BnaA01g36520D	-2.77766	-0.629564
BnaA02g02010D	-1.52617	1.21652
BnaA02g02520D	8.35589	-10.488
BnaA02g03720D	0	0
BnaA02g04550D	4.03204	-0.731125
BnaA02g04560D	0	0
BnaA02g07630D	0	-1.42417
BnaA02g11200D	-0.833191	1.53127
BnaA02g14050D	0	0
BnaA02g18580D	0	0
BnaA02g24880D	0	0
BnaA02g29220D	-0.962206	2.07658
BnaA02g34060D	0	0
BnaA02g34070D	-0.396347	4.14944
BnaA03g06740D	0	0
BnaA03g09760D	0.665496	1.10502
BnaA03g17000D	1.81787	-0.544008
BnaA03g17800D	10.8365	12.253
BnaA03g18320D	0	0
BnaA03g19490D	0	0
BnaA03g28350D	0	0
BnaA03g39250D	0.0194338	0.0887133
BnaA03g43240D	0	0
BnaA03g47720D	0	0
BnaA03g47730D	0.104101	-3.25994
BnaA03g51170D	-0.69129	1.59124
BnaA03g52510D	-1.05681	0.893154
BnaA03g53120D	0.223485	-0.937709
BnaA03g54060D	-0.042681	-0.925779
BnaA03g55260D	0	0
BnaA04g09990D	-1.57374	3.66125
BnaA04g12860D	-3.5366	1.7946
BnaA04g21990D	-1.35753	7.05434
BnaA04g22000D	-0.12513	-0.579906
BnaA04g23960D	1.1278	-0.697588
BnaA04g25090D	0	9.87349
BnaA04g29190D	2.24257	1.13813
BnaA05g09700D	-10.3185	6.06159
BnaA05g19460D	-3.07743	3.64189
BnaA05g22930D	0.316891	0.481805
BnaA05g34020D	0	0
BnaA05g34960D	0.76377	0
BnaA06g04380D	0.989131	1.58634
BnaA06g16150D	0.737128	0.489177
BnaA06g16160D	-1.0815	0
BnaA06g23250D	-4.6812	-7.68746
BnaA06g23260D	0	0
BnaA06g23270D	-0.480233	2.59097
BnaA06g26600D	0	0
BnaA06g35670D	-3.50418	10.0418
BnaA07g01880D	8.78333	0
BnaA07g03710D	8.06356	2.77699
BnaA07g07020D	-2.147	0
BnaA07g12740D	0	0
BnaA07g23450D	-1.47945	-0.531766
BnaA07g24420D	0	0
BnaA07g27500D	-6.99499	0
BnaA07g29460D	-0.567139	3.50839
BnaA07g33290D	6.79064	0
BnaA07g33560D	0.091889	0.428971
BnaA08g02580D	8.22542	0
BnaA08g11780D	0.89303	-1.79346
BnaA08g28210D	0	0
BnaA08g28220D	0	0
BnaA09g02240D	-1.02346	1.37538
BnaA09g05060D	0	-7.38724
BnaA09g07380D	0	0
BnaA09g08390D	-0.544388	0.25159
BnaA09g21850D	-2.43398	0
BnaA09g25570D	-1.41253	0.800243
BnaA09g29780D	0	0
BnaA09g31650D	5.35826	0
BnaA09g41210D	-2.89787	13.022
BnaA09g42650D	-0.151904	-1.82153
BnaA09g49190D	0.648502	1.9325
BnaA09g53760D	-0.543149	1.78372
BnaA09g57020D	0.810364	10.3113
BnaA10g03270D	0	0
BnaA10g03280D	-0.565482	1.72263
BnaA10g03290D	0.14328	1.36676
BnaA10g15310D	0	0
BnaA10g15320D	1.37968	-0.80768
BnaA10g18930D	0	8.34836
BnaA10g19500D	0	0
BnaA10g24230D	2.16774	1.40542
BnaA10g24240D	2.76326	3.59511
BnaA10g25070D	-0.153416	2.28677
BnaA10g28130D	-0.322994	2.78108
BnaA10g28250D	0	0
BnaA10g29690D	0	2.43762
BnaC01g01390D	0	0
BnaC01g01400D	-0.673843	-0.25179
BnaC01g02300D	-0.599224	0.232736
BnaC01g02640D	-0.792078	-0.990657
BnaC01g04440D	-1.52787	9.33145
BnaC01g04790D	-0.731022	1.16661
BnaC01g10300D	0	0
BnaC01g13370D	-1.60374	1.74972
BnaC01g17910D	-0.751774	-1.97118
BnaC01g17990D	0	0
BnaC01g21870D	0	0
BnaC01g25860D	-0.329612	1.1928
BnaC01g28040D	-9.14965	8.56023
BnaC01g31810D	-2.42455	0.980848
BnaC01g39080D	6.62882	0
BnaC01g40580D	0	0
BnaC02g00920D	0	0
BnaC02g02350D	2.58194	1.99193
BnaC02g05160D	0.37154	0
BnaC02g05920D	1.53396	-3.11168
BnaC02g07500D	0	0
BnaC02g09180D	4.6958	-0.983488
BnaC02g09190D	0	0
BnaC02g09490D	3.36148	12.4892
BnaC02g10690D	2.43526	0.663505
BnaC02g10720D	0	0
BnaC02g15500D	0.631908	2.3318
BnaC02g16700D	0	0
BnaC02g18660D	0	8.68881
BnaC02g33030D	0	0
BnaC02g37290D	-1.39743	0.136846
BnaC02g42920D	0	0
BnaC02g42930D	0.550255	3.06313
BnaC03g02110D	0	0
BnaC03g08610D	0	0
BnaC03g20530D	0.711464	0.068397
BnaC03g21830D	0	0
BnaC03g23360D	0	0
BnaC03g28220D	8.63813	-0.294585
BnaC03g33490D	0	0
BnaC03g40020D	0	0
BnaC03g46570D	0.169061	0.279893
BnaC03g50050D	0	0
BnaC03g50060D	-4.23716	6.31964
BnaC03g50080D	0	0
BnaC03g50090D	-4.57323	6.54761
BnaC03g66590D	1.1516	-1.43367
BnaC04g09760D	-7.97256	9.33972
BnaC04g34810D	-1.87862	2.04173
BnaC04g47720D	3.72324	8.42995
BnaC04g48960D	0	0
BnaC04g56590D	1.72708	9.85428
BnaC04g56600D	-0.132495	8.96097
BnaC04g56610D	3.72735	1.48267
BnaC05g03280D	0	0
BnaC05g03290D	-0.110811	1.83506
BnaC05g03300D	0.292813	1.23607
BnaC05g05550D	0.658195	1.6206
BnaC05g19990D	-1.09595	0.285323
BnaC05g36360D	0.251804	-0.341525
BnaC05g48680D	0	0
BnaC05g49640D	-6.46891	7.14408
BnaC05g50770D	0	0
BnaC06g01060D	0	0
BnaC06g12560D	0.864535	3.75048
BnaC06g21080D	-8.04113	0
BnaC06g25550D	0	0
BnaC06g29700D	-8.43328	8.56023
BnaC06g32660D	-0.514217	3.3931
BnaC06g37840D	0	0
BnaC06g38150D	-0.156643	0.429638
BnaC07g03670D	0	0
BnaC07g03680D	0	0
BnaC07g05770D	2.98545	3.0744
BnaC07g08680D	1.93933	0
BnaC07g19810D	-7.13227	0
BnaC07g30370D	0	0
BnaC07g34540D	0	0
BnaC07g40000D	0	0
BnaC07g40010D	1.24815	0
BnaC07g42360D	0.942458	-2.95579
BnaC07g44240D	-3.11756	2.47491
BnaC07g45330D	-0.529181	-0.590738
BnaC07g46560D	-0.180063	-0.876307
BnaC07g51170D	-0.729214	0.878478
BnaC08g02790D	-7.87991	10.0157
BnaC08g20810D	-3.05606	13.5585
BnaC08g20820D	1.68205	0.425171
BnaC08g22410D	0.045096	-1.04128
BnaC08g33770D	-1.9289	2.04514
BnaC08g35130D	0.466478	-1.95825
BnaC08g39510D	1.37643	1.38799
BnaC08g43490D	0.0714401	2.13545
BnaC08g44110D	0	0
BnaC08g44120D	0	0
BnaC08g44130D	0	0
BnaC08g44140D	-7.41509	13.832
BnaC08g46330D	0	0
BnaC08g46340D	0	0
BnaC08g49050D	-3.97771	4.01114
BnaC09g01650D	-0.819463	0.545023
BnaC09g04610D	0	0
BnaC09g07300D	0	-6.86022
BnaC09g08120D	0	0
BnaC09g08690D	-0.0847989	-0.619769
BnaC09g19870D	0	0
BnaC09g24040D	3.15315	0
BnaC09g25420D	-0.992798	4.12015
BnaC09g37740D	0	0
BnaC09g37760D	10.6702	0.0378399
BnaC09g37770D	0	9.39457
BnaC09g48850D	3.31503	1.86935
BnaC09g48860D	2.44683	-9.04738
BnaC09g50000D	-1.31467	2.12434
BnaC09g54550D	-7.68428	7.24

## Sheet: B. napus at -2℃
Table S5 Log2 means of FPKM of different cold-resistant varieties in RNA-seq under freezing stress for BrAPXs and BnAPXs
Gene_id	2016TS(G)10_freezing_1 h	2016TS(G)10_freezing_3 h	2016TS(G)10_freezing_24 h
BnaA01g00410D	0.882655	2.20965	1.57592
BnaA01g01260D	0	0	0
BnaA01g01280D	0	0	0
BnaA01g01600D	-0.391972	1.42731	2.06283
BnaA01g03170D	0	0	0
BnaA01g03180D	0	0	0
BnaA01g03520D	-18.583	-0.0123289	1.74838
BnaA01g06830D	0	0	0
BnaA01g08600D	0	0	0
BnaA01g11800D	0.118633	-0.435857	0.166958
BnaA01g15150D	-0.076789	0.0826344	0.232682
BnaA01g15230D	0	0	0
BnaA01g17520D	0	0	0
BnaA01g20660D	-1.03014	-1.26671	-0.750719
BnaA01g32160D	0	0	0
BnaA01g34030D	0	0	0
BnaA01g36520D	0	0	0
BnaA02g02010D	0	-0.14666	1.68492
BnaA02g02520D	0	0	0
BnaA02g03720D	0	0	0
BnaA02g04550D	0	0	0
BnaA02g04560D	0	0	0
BnaA02g07630D	0	0	0
BnaA02g11200D	-1.27258	0.442754	0.376063
BnaA02g14050D	0	0	0
BnaA02g18580D	0	0	0
BnaA02g24880D	0	0	0
BnaA02g29220D	-1.12233	-0.388832	-0.929451
BnaA02g34060D	0	0	0
BnaA02g34070D	0	0	0
BnaA03g06740D	0	0	0
BnaA03g09760D	-0.140488	-0.298853	-0.437907
BnaA03g17000D	2.08147	2.99072	3.49162
BnaA03g17800D	0	0	0
BnaA03g18320D	0	0	0
BnaA03g19490D	0	0	0
BnaA03g28350D	0	0	0
BnaA03g39250D	0.255267	0.23022	0.0176927
BnaA03g43240D	0	0	0
BnaA03g47720D	0	0	0
BnaA03g47730D	0.345903	0.496101	-0.45784
BnaA03g51170D	0	0	0
BnaA03g52510D	0.369546	0.788614	1.94192
BnaA03g53120D	-0.655452	-0.862435	-0.780334
BnaA03g54060D	0.337578	-0.447348	-0.0390842
BnaA03g55260D	0	0	0
BnaA04g09990D	0.0473943	-0.206118	0.0285955
BnaA04g12860D	0.0331972	-0.0690913	0.992367
BnaA04g21990D	0	0	0
BnaA04g22000D	0	0	0
BnaA04g23960D	0	0.737733	2.49973
BnaA04g25090D	-0.199825	0.779183	-0.364302
BnaA04g29190D	-0.33235	-0.35294	-0.878174
BnaA05g09700D	0.131165	0.305681	0.0853771
BnaA05g19460D	-3.38905	-3.13044	-2.4712
BnaA05g22930D	-0.663323	-1.32669	-1.03918
BnaA05g34020D	0	0	0
BnaA05g34960D	0.312356	-0.0964397	-0.0560702
BnaA06g04380D	0.031326	-0.0399458	-0.162264
BnaA06g16150D	0.234374	1.26062	0.962667
BnaA06g16160D	-1.64616	-1.31187	-0.733551
BnaA06g23250D	0	0	0
BnaA06g23260D	0	0	0
BnaA06g23270D	0	0	0
BnaA06g26600D	0	0	0
BnaA06g35670D	0	0	0
BnaA07g01880D	0	0	0
BnaA07g03710D	0	0.300325	0
BnaA07g07020D	0.517633	0.409986	0.45929
BnaA07g12740D	0	0	0
BnaA07g23450D	-0.817959	-0.123785	0.39285
BnaA07g24420D	0	0	0
BnaA07g27500D	0	0	0
BnaA07g29460D	-0.376926	0.105197	0.444119
BnaA07g33290D	0	0	0
BnaA07g33560D	-0.372368	0.118932	-0.282149
BnaA08g02580D	0	0	0
BnaA08g11780D	1.99801	2.14502	1.14684
BnaA08g28210D	0	0	0
BnaA08g28220D	0	0	0
BnaA09g02240D	-0.00122021	-0.0430813	-0.428557
BnaA09g05060D	0.295695	0.101308	0
BnaA09g07380D	0	0	0
BnaA09g08390D	-2.34036	-2.34606	-2.11215
BnaA09g21850D	0	0	0
BnaA09g25570D	0.0808088	0.425864	0.809012
BnaA09g29780D	0	0	0
BnaA09g31650D	0	0	0
BnaA09g41210D	0.560194	0.703695	0.481952
BnaA09g49190D	0.0828895	0.0567686	-0.0426865
BnaA09g53760D	1.29351	1.9053	1.00382
BnaA09g57020D	0	0	0
BnaA10g03270D	0	0	0
BnaA10g03280D	1.31573	1.4007	0.795669
BnaA10g03290D	-0.437969	0.314469	-0.231747
BnaA10g15310D	0	0	0
BnaA10g15320D	0	0	0
BnaA10g18930D	0	0	0
BnaA10g19500D	0	0	0
BnaA10g24230D	2.72771	1.1818	1.1921
BnaA10g24240D	0	0	0
BnaA10g25070D	0	0	0
BnaA10g28130D	0	0	0
BnaA10g28250D	0	0	0
BnaA10g29690D	0	0	0
BnaC01g01390D	0	0	0
BnaC01g01400D	0.894725	0.621737	0.654289
BnaC01g02300D	0	0	0
BnaC01g02640D	0.0773853	0.89332	1.70137
BnaC01g04440D	0.735517	2.29074	0.617862
BnaC01g04790D	0.2544	-2.90656	1.19653
BnaC01g10300D	0	0	0
BnaC01g13370D	-0.155819	-0.887296	-0.146124
BnaC01g17910D	0	0	0
BnaC01g17990D	0	0	0
BnaC01g21870D	0	0	0
BnaC01g25860D	-1.95565	-1.67148	-2.4339
BnaC01g28040D	0	0	0
BnaC01g31810D	1.85738	2.92539	2.92218
BnaC01g39080D	0	0	0
BnaC01g40580D	0	0	0
BnaC02g00920D	0	0	0
BnaC02g02350D	0	0	0
BnaC02g05160D	0	0	0
BnaC02g05920D	0	0	1.67197
BnaC02g07500D	0	0	0
BnaC02g09180D	0	0	0
BnaC02g09190D	0	0	0
BnaC02g09490D	0	0	0
BnaC02g10690D	0	0	0
BnaC02g10720D	0	0	0
BnaC02g15500D	0	0	0
BnaC02g16700D	0	0	0
BnaC02g18660D	0	0	0
BnaC02g33030D	0	0	0
BnaC02g37290D	-0.300127	0.112184	-0.0989823
BnaC02g42920D	0	0	0
BnaC02g42930D	0	0	0
BnaC03g02110D	0	0	0
BnaC03g08610D	0	0	0
BnaC03g20530D	0.955304	2.08729	2.37841
BnaC03g21830D	0	0	0
BnaC03g23360D	0	0	0
BnaC03g28220D	0.534475	0.0397535	0
BnaC03g33490D	0	0	0
BnaC03g40020D	0	0	0
BnaC03g46570D	0.0778353	0.2293	-0.0907231
BnaC03g50050D	0	0	0
BnaC03g50060D	0	0	0
BnaC03g50080D	0	0	0
BnaC03g50090D	0	0	0
BnaC03g66590D	2.06646	1.98313	1.6688
BnaC04g09760D	0	0	0
BnaC04g34810D	2.39592	-0.808149	2.07156
BnaC04g47720D	0	0	0
BnaC04g48960D	0	0	0
BnaC04g56590D	0	0	0
BnaC04g56600D	0	0	0
BnaC04g56610D	0	0	0
BnaC05g03280D	0	0	0
BnaC05g03290D	1.90847	1.92783	1.59155
BnaC05g03300D	-0.0845473	0.00153489	-0.573206
BnaC05g05550D	0.273698	0.074259	0.124507
BnaC05g19990D	0	0	0
BnaC05g36360D	0.0737795	0.204147	0.909824
BnaC05g48680D	0	0	0
BnaC05g49640D	0	0	0
BnaC05g50770D	0	0	0
BnaC06g01060D	0	-1.02558	0
BnaC06g12560D	0	0	0
BnaC06g21080D	-0.26792	-0.264756	-2.46487
BnaC06g25550D	0	0	0
BnaC06g29700D	0	0	0
BnaC06g32660D	-0.706124	-0.479507	-0.164352
BnaC06g37840D	0	0	0
BnaC06g38150D	-0.163135	0.174334	-0.140652
BnaC07g03670D	0	0	0
BnaC07g03680D	0	0	0
BnaC07g05770D	0	-1.09252	0.400202
BnaC07g08680D	0	0	0
BnaC07g19810D	0	0	0
BnaC07g30370D	0	0	0
BnaC07g34540D	0	0	0
BnaC07g40000D	0	0	0
BnaC07g40010D	0	0	0
BnaC07g42360D	0	0	0
BnaC07g44240D	-1.03069	-1.64708	-0.40528
BnaC07g45330D	-0.325026	-0.552384	-0.465734
BnaC07g46560D	0.432997	0.68821	0.486538
BnaC07g51170D	0.226696	-1.42512	1.49726
BnaC08g02790D	0	0	0
BnaC08g20810D	-0.151486	-0.0610726	-0.261639
BnaC08g20820D	-0.255066	0.712606	0.834086
BnaC08g22410D	0.576752	1.25461	0.311989
BnaC08g33770D	0.319655	0.0801427	0.363114
BnaC08g35130D	-0.471102	-0.677487	-0.572455
BnaC08g39510D	0	0	0
BnaC08g43490D	0.23712	-0.104986	-0.33066
BnaC08g44110D	0	0	0
BnaC08g44120D	0	0	0
BnaC08g44130D	0	0	0
BnaC08g44140D	0	0	0
BnaC08g46330D	0	0	0
BnaC08g46340D	0	0	0
BnaC08g49050D	0.443121	-0.0721232	0.668542
BnaC09g01650D	-0.0117149	-0.308303	-0.278983
BnaC09g04610D	0	0	0
BnaC09g07300D	0	0	0
BnaC09g08120D	0	0	0
BnaC09g08690D	-0.741475	-0.495952	-0.0402132
BnaC09g19870D	0	0	0
BnaC09g24040D	0	0	0
BnaC09g25420D	0.612419	0.972835	1.48918
BnaC09g37740D	0	0	0
BnaC09g37760D	0	0	0
BnaC09g37770D	0	0	0
BnaC09g48850D	1.46142	5.10267	4.71206
BnaC09g48860D	0	0	0
BnaC09g50000D	0	0	0
BnaC09g54550D	0	0	0
